# Supplementary material for: Tuning the photophysical properties of 4′-substituted terpyridines – an experimental and theoretical study
Source: Royal Society of Chemistry journal article supplement (doi:10.1039/c6ob00038j), 2016-01-01

**Tuning the photophysical properties of 4'-substituted terpyridines - experimental and theoretical study**

**ELECTRONIC SUPPLEMENTARY INFORMATION**

**Anna Maroń<sup>a</sup>, Agata Szlapa<sup>b</sup>, Tomasz Klemens<sup>a</sup>, Sławomir Kula<sup>b</sup>, Barbara Machura<sup>a\*</sup>, Stanisław Krompiec<sup>b</sup>, Jan Grzegorz Małecki<sup>a</sup>, Anna Świtlicka-Olszewska<sup>a</sup>, Karol Erfurt<sup>c</sup>, Anna Chrobok<sup>c</sup>**

<sup>a</sup>*Department of Crystallography, Institute of Chemistry, University of Silesia, 9<sup>th</sup> Szkolna St., 40-006 Katowice, Poland*

<sup>b</sup>*Department of Inorganic, Organometallic Chemistry and Catalysis, Institute of Chemistry, University of Silesia, 9<sup>th</sup> Szkolna St., 40-006 Katowice, Poland*

<sup>c</sup>*Department of Chemical Organic Technology and Petrochemistry, Silesian University of Technology, Krzywoustego 4, 44-100 Gliwice, Poland*

**Abstract:** Several 2,2':6',2''-terpyridines substituted in 4'-position were synthesized and their photophysical properties were investigated by absorption and photoluminescence spectroscopy in dilute solutions and solid state. The studies confirmed that the absorption and emission wavelengths, fluorescence quantum yields and lifetimes of **1-R<sup>1-16</sup>** are strongly structure-related, demonstrating a decisive role of the nature of the substituent in determining photophysical properties of 4'-functionalized terpyridines. Additionally, the density functional theory (DFT) calculations were performed for **1-R<sup>1-16</sup>** to get an insight into their electronic structure and spectroscopic properties.

**Keywords:** 2,2':6',2''-terpyridine derivatives, absorption and fluorescence spectra, effect of solvent polarity, intramolecular charge transfer, DFT calculations.

\* Corresponding author, email: [bmachura@poczta.onet.pl](mailto:bmachura@poczta.onet.pl)

## Tables:

**Table S1.** Experimental and calculated bond lengths [ $\text{\AA}$ ] and angles [ $^\circ$ ] for 2.2':6'.2''-terpyridine derivatives

**Table S2.** Short intra- and intermolecular contacts detected in structures **1-R<sup>3</sup>**, **1-R<sup>7</sup>**, **1-R<sup>8</sup>** and **1-R<sup>14</sup>**.

**Table S3.** Calculated Onsager cavity radius ( $a$ )

**Table S4.** Electrochemical properties and optical band gaps of **1-R<sup>1-16</sup>** derivatives

**Table S5.** The energies and characters of the selected calculated transitions assigned to the lowest experimental absorption bands of the compounds **1-R<sup>1-16</sup>** (in acetonitrile)

## Figures:

**Figure S1.** View of the packing of **1-R<sup>3</sup>**, **1-R<sup>7</sup>**, **1-R<sup>8</sup>** and **1-R<sup>14</sup>** showing short intra- and intermolecular C—H $\cdots$ O and C—H $\cdots$ N contacts.

**Figure S2.** Hirshfeld surfaces, 2D fingerprint plots and percentage contributions to the Hirshfeld surface area for the various close intermolecular contacts for molecules of **1-R<sup>3</sup>**, **1-R<sup>7</sup>** and **1-R<sup>14</sup>** compounds.

**Figure S3.** Plot of difference between absorption and fluorescence wavenumber  $\Delta\bar{\nu}_{st}$  vs. solvent polarity parameter  $\Delta f$  for **1-R<sup>4</sup>**.

**Figure S4.** Plot of difference between absorption and fluorescence wavenumber  $\Delta\bar{\nu}_{st}$  vs. solvent polarity parameter  $\Delta f$  for **1-R<sup>7</sup>**.

**Figure S5.** Plot of difference between absorption and fluorescence wavenumber  $\Delta\bar{\nu}_{st}$  vs. solvent polarity parameter  $\Delta f$  for **1-R<sup>9</sup>**.

**Figure S6.** Plot of difference between absorption and fluorescence wavenumber  $\Delta\bar{\nu}_{st}$  vs. solvent polarity parameter  $\Delta f$  for **1-R<sup>10</sup>**.

**Figure S7.** Plot of difference between absorption and fluorescence wavenumber  $\Delta\bar{\nu}_{st}$  vs. solvent polarity parameter  $\Delta f$  for **1-R<sup>11</sup>**.

**Figure S8.** Plot of difference between absorption and fluorescence wavenumber  $\Delta\bar{\nu}_{st}$  vs. solvent polarity parameter  $\Delta f$  for **1-R<sup>14</sup>**.

**Figure S9.** Frontier molecular orbitals of **1-R<sup>1-16</sup>** calculated at DFT/B3LYP level using the polarizable continuum model (MeCN).

**Figure S10.** Partial density of states diagrams for **1-R<sup>1-16</sup>**.

**Figure S11.** Electronic absorption spectra of compounds **1-R<sup>3-6</sup>**, **1-R<sup>8-9</sup>**, **1-R<sup>11</sup>**, **1-R<sup>13-14</sup>**.

**Figure S12.** Excitation and emission spectra of compounds **1-R<sup>1-16</sup>**

**Figure S13.** Relative orientation of the experimental (blue) and optimised (red) molecules of **1-R<sup>3</sup>**, **1-R<sup>7</sup>**, **1-R<sup>8</sup>** and **1-R<sup>14</sup>**.

**Figure S14.** Experimental and calculated with CIS(D) and TD-DFT method absorption spectra

**Table S1.** Experimental and calculated bond lengths [Å] and angles [°] for 2.2':6'.2"-terpyridine derivatives.

| Bonds [Å]        |            |             |          | Angles [°]       |                  |            |                  |            |        |
|------------------|------------|-------------|----------|------------------|------------------|------------|------------------|------------|--------|
|                  |            |             |          | 1-R <sup>3</sup> |                  |            |                  |            |        |
| exp              | calc       |             |          | exp              | calc             |            |                  | exp        | calc   |
| N(1)–C(1)        | 1.340(2)   | N(4)–C(27)  | 1.339(2) | 1.353            | C(1)–N(1)–C(5)   | 122.74(17) | C(27)–N(4)–C(31) | 117.57(15) | 118.74 |
| N(1)–C(5)        | 1.345(2)   | N(4)–C(31)  | 1.347(2) | 1.354            | C(10)–N(2)–C(6)  | 116.50(15) | C(32)–N(5)–C(36) | 116.8(2)   | 118.74 |
| N(2)–C(6)        | 1.337(2)   | N(5)–C(32)  | 1.339(3) | 1.358            | C(15)–N(3)–C(11) | 116.8(2)   | C(41)–N(6)–C(37) | 116.69(18) | 118.76 |
| N(2)–C(10)       | 1.342(3)   | N(5)–C(36)  | 1.345(3) | 1.347            | N(1)–C(1)–C(2)   | 122.74(17) | N(4)–C(27)–C(28) | 122.94(16) | 122.10 |
| N(3)–C(11)       | 1.345(3)   | N(6)–C(37)  | 1.344(2) | 1.358            | N(1)–C(1)–C(6)   | 116.50(15) | N(4)–C(27)–C(32) | 116.31(15) | 117.11 |
| N(3)–C(15)       | 1.334(3)   | N(6)–C(41)  | 1.331(3) | 1.347            | N(1)–C(5)–C(4)   | 122.64(15) | N(4)–C(31)–C(30) | 122.66(15) | 122.21 |
| C(1)–C(2)        | 1.388(2)   | C(27)–C(28) | 1.388(3) | 1.402            | N(1)–C(5)–C(11)  | 116.32(16) | N(4)–C(31)–C(37) | 116.19(15) | 117.06 |
| C(1)–C(6)        | 1.493(3)   | C(27)–C(32) | 1.496(3) | 1.484            | N(2)–C(6)–C(1)   | 116.03(16) | N(5)–C(32)–C(27) | 116.08(17) | 116.82 |
| C(2)–C(3)        | 1.393(3)   | C(28)–C(29) | 1.390(3) | 1.405            | N(2)–C(6)–C(7)   | 122.72(18) | N(5)–C(32)–C(33) | 122.83(18) | 121.72 |
| C(3)–C(4)        | 1.388(2)   | C(29)–C(30) | 1.392(2) | 1.406            | N(2)–C(10)–C(9)  | 124.1(2)   | N(5)–C(36)–C(35) | 124.1(2)   | 122.99 |
| C(3)–C(16)       | 1.490(2)   | C(29)–C(42) | 1.489(2) | 1.489            | N(3)–C(11)–C(5)  | 115.78(18) | N(6)–C(37)–C(31) | 115.78(16) | 116.81 |
| C(4)–C(5)        | 1.381(3)   | C(30)–C(31) | 1.381(2) | 1.402            | N(3)–C(11)–C(12) | 122.49(18) | N(6)–C(37)–C(38) | 122.49(16) | 121.72 |
| C(5)–C(11)       | 1.492(2)   | C(31)–C(37) | 1.493(2) | 1.484            | N(3)–C(15)–C(14) | 124.9(3)   | N(6)–C(41)–C(40) | 124.7(2)   | 122.98 |
| C(6)–C(7)        | 1.383(3)   | C(32)–C(33) | 1.379(3) | 1.404            |                  |            |                  |            |        |
| C(7)–C(8)        | 1.378(3)   | C(33)–C(34) | 1.390(3) | 1.396            |                  |            |                  |            |        |
| C(8)–C(9)        | 1.365(4)   | C(34)–C(35) | 1.364(4) | 1.400            |                  |            |                  |            |        |
| C(9)–C(10)       | 1.368(4)   | C(35)–C(36) | 1.364(4) | 1.398            |                  |            |                  |            |        |
| C(11)–C(12)      | 1.377(3)   | C(37)–C(38) | 1.378(3) | 1.404            |                  |            |                  |            |        |
| C(12)–C(13)      | 1.388(3)   | C(38)–C(39) | 1.382(3) | 1.396            |                  |            |                  |            |        |
| C(13)–C(14)      | 1.370(4)   | C(39)–C(40) | 1.373(3) | 1.400            |                  |            |                  |            |        |
| C(14)–C(15)      | 1.357(5)   | C(40)–C(41) | 1.374(4) | 1.399            |                  |            |                  |            |        |
| C(16)–C(25)      | 1.425(3)   | C(42)–C(51) | 1.432(2) | 1.443            |                  |            |                  |            |        |
| C(16)–C(17)      | 1.373(2)   | C(42)–C(43) | 1.363(3) | 1.387            |                  |            |                  |            |        |
| C(17)–C(18)      | 1.398(3)   | C(43)–C(44) | 1.398(3) | 1.414            |                  |            |                  |            |        |
| C(18)–C(19)      | 1.365(3)   | C(44)–C(45) | 1.371(2) | 1.381            |                  |            |                  |            |        |
| C(19)–C(20)      | 1.431(2)   | C(45)–C(46) | 1.425(3) | 1.432            |                  |            |                  |            |        |
| C(19)–O(1)       | 1.357(2)   | C(45)–O(2)  | 1.358(2) | 1.389            |                  |            |                  |            |        |
| C(26)–O(1)       | 1.421(2)   | C(52)–O(2)  | 1.415(2) | 1.451            |                  |            |                  |            |        |
| C(20)–C(21)      | 1.408(3)   | C(46)–C(47) | 1.419(2) | 1.421            |                  |            |                  |            |        |
| C(20)–C(25)      | 1.418(2)   | C(46)–C(51) | 1.421(2) | 1.438            |                  |            |                  |            |        |
| C(21)–C(22)      | 1.366(3)   | C(47)–C(48) | 1.360(3) | 1.381            |                  |            |                  |            |        |
| C(22)–C(23)      | 1.398(3)   | C(48)–C(49) | 1.394(3) | 1.415            |                  |            |                  |            |        |
| C(23)–C(24)      | 1.354(3)   | C(49)–C(50) | 1.365(3) | 1.382            |                  |            |                  |            |        |
| C(24)–C(25)      | 1.422(2)   | C(50)–C(51) | 1.410(2) | 1.425            |                  |            |                  |            |        |
| 1-R <sup>7</sup> |            |             |          |                  |                  |            |                  |            |        |
| N(1)–C(1)        | 1.3423(17) |             |          | 1.355            | C(1)–N(1)–C(5)   | 117.19(11) |                  |            | 118.56 |
| N(1)–C(5)        | 1.3427(18) |             |          | 1.355            | C(10)–N(2)–C(6)  | 117.62(13) |                  |            | 118.75 |
| N(2)–C(6)        | 1.3401(18) |             |          | 1.359            | C(15)–N(3)–C(11) | 117.32(15) |                  |            | 118.75 |
| N(2)–C(10)       | 1.3362(19) |             |          | 1.349            | N(1)–C(1)–C(2)   | 122.79(12) |                  |            | 122.18 |
| N(3)–C(11)       | 1.3328(19) |             |          | 1.359            | N(1)–C(1)–C(6)   | 117.33(11) |                  |            | 116.85 |
| N(3)–C(15)       | 1.333(2)   |             |          | 1.349            | N(1)–C(5)–C(4)   | 123.02(12) |                  |            | 122.18 |
| N(4)–C(19)       | 1.3748(17) |             |          | 1.383            | N(1)–C(5)–C(11)  | 116.31(11) |                  |            | 116.85 |
| N(4)–C(22)       | 1.4334(19) |             |          | 1.466            | N(2)–C(6)–C(1)   | 116.29(11) |                  |            | 116.99 |
| N(4)–C(23)       | 1.4358(19) |             |          | 1.466            | N(2)–C(6)–C(7)   | 121.82(13) |                  |            | 121.59 |
| C(1)–C(2)        | 1.3836(18) |             |          | 1.400            | N(2)–C(10)–C(9)  | 123.67(16) |                  |            | 123.00 |
| C(1)–C(6)        | 1.4876(19) |             |          | 1.486            | N(3)–C(11)–C(5)  | 116.35(12) |                  |            | 116.99 |
| C(2)–C(3)        | 1.3926(18) |             |          | 1.409            | N(3)–C(11)–C(12) | 122.01(13) |                  |            | 121.59 |
| C(3)–C(4)        | 1.3894(18) |             |          | 1.409            | N(3)–C(15)–C(14) | 124.11(18) |                  |            | 123.00 |
| C(3)–C(16)       | 1.4772(17) |             |          | 1.478            |                  |            |                  |            |        |
| C(4)–C(5)        | 1.3889(18) |             |          | 1.400            |                  |            |                  |            |        |
| C(5)–C(11)       | 1.4917(18) |             |          | 1.486            |                  |            |                  |            |        |
| C(6)–C(7)        | 1.3795(18) |             |          | 1.404            |                  |            |                  |            |        |
| C(7)–C(8)        | 1.378(2)   |             |          | 1.397            |                  |            |                  |            |        |
| C(8)–C(9)        | 1.361(3)   |             |          | 1.400            |                  |            |                  |            |        |
| C(9)–C(10)       | 1.371(2)   |             |          | 1.399            |                  |            |                  |            |        |
| C(11)–C(12)      | 1.3777(19) |             |          | 1.404            |                  |            |                  |            |        |
| C(12)–C(13)      | 1.376(2)   |             |          | 1.398            |                  |            |                  |            |        |
| C(13)–C(14)      | 1.359(3)   |             |          | 1.400            |                  |            |                  |            |        |
| C(14)–C(15)      | 1.366(3)   |             |          | 1.399            |                  |            |                  |            |        |
| C(16)–C(21)      | 1.3897(18) |             |          | 1.411            |                  |            |                  |            |        |
| C(16)–C(17)      | 1.3908(19) |             |          | 1.411            |                  |            |                  |            |        |
| C(17)–C(18)      | 1.3762(19) |             |          | 1.391            |                  |            |                  |            |        |
| C(18)–C(19)      | 1.3978(19) |             |          | 1.421            |                  |            |                  |            |        |
| C(19)–C(20)      | 1.4007(19) |             |          | 1.421            |                  |            |                  |            |        |
| C(20)–C(21)      | 1.3763(18) |             |          | 1.391            |                  |            |                  |            |        |
| 1-R <sup>8</sup> |            |             |          |                  |                  |            |                  |            |        |
| N(1)–C(1)        | 1.3415(16) |             |          | 1.353            | C(1)–N(1)–C(5)   | 118.22(17) |                  |            | 118.9  |
| N(1)–C(1)#1      | 1.3415(16) |             |          | 1.353            | C(4)–N(2)–C(8)   | 117.37(14) |                  |            | 118.8  |
| N(2)–C(4)        | 1.3358(18) |             |          | 1.358            | C(11)–N(3)–C(11) | 115.55(19) |                  |            | 117.3  |
| N(2)–C(8)        | 1.3381(19) |             |          | 1.347            | N(1)–C(1)–C(2)   | 122.49(13) |                  |            | 122.1  |
| N(3)–C(11)       | 1.3309(18) |             |          | 1.352            | N(1)–C(1)–C(4)   | 116.21(13) |                  |            | 117.2  |
| N(3)–C(11)#1     | 1.3309(18) |             |          | 1.352            | N(2)–C(4)–C(1)   | 116.45(13) |                  |            | 116.7  |
| C(1)–C(2)        | 1.388(2)   |             |          | 1.402            | N(2)–C(4)–C(5)   | 122.19(13) |                  |            | 121.8  |
| C(1)–C(4)        | 1.4875(19) |             |          | 1.484            | N(2)–C(8)–C(7)   | 124.00(16) |                  |            | 124.7  |
| C(2)–C(3)        | 1.3895(17) |             |          | 1.404            | N(3)–C(11)–C(10) | 124.29(15) |                  |            | 123.9  |

|                         |            |       |                  |          |        |
|-------------------------|------------|-------|------------------|----------|--------|
| C(3)–C(2)#1             | 1.3895(17) | 1.404 |                  |          |        |
| C(3)–C(9)               | 1.490(3)   | 1.485 |                  |          |        |
| C(4)–C(5)               | 1.387(2)   | 1.404 |                  |          |        |
| C(5)–C(6)               | 1.378(2)   | 1.396 |                  |          |        |
| C(6)–C(7)               | 1.367(2)   | 1.400 |                  |          |        |
| C(7)–C(8)               | 1.368(2)   | 1.399 |                  |          |        |
| C(9)–C(10)#1            | 1.3843(17) | 1.407 |                  |          |        |
| C(9)–C(10)              | 1.3843(17) | 1.407 |                  |          |        |
| C(10)–C(11)             | 1.371(2)   | 1.396 |                  |          |        |
| <b>1–R<sup>14</sup></b> |            |       |                  |          |        |
| N(1)–C(1)               | 1.350(3)   | 1.355 | C(1)–N(1)–C(5)   | 119.2(2) | 118.87 |
| N(1)–C(5)               | 1.351(3)   | 1.355 | C(10)–N(2)–C(6)  | 116.6(3) | 118.72 |
| N(2)–C(6)               | 1.356(3)   | 1.359 | C(15)–N(3)–C(11) | 115.8(3) | 118.71 |
| N(2)–C(10)              | 1.337(4)   | 1.349 | N(1)–C(1)–C(2)   | 121.3(2) | 122.17 |
| N(3)–C(11)              | 1.333(3)   | 1.359 | N(1)–C(1)–C(6)   | 116.6(3) | 117.01 |
| N(3)–C(15)              | 1.304(4)   | 1.349 | N(1)–C(5)–C(4)   | 120.9(2) | 122.17 |
| C(1)–C(2)               | 1.350(4)   | 1.399 | N(1)–C(5)–C(11)  | 117.4(2) | 117.00 |
| C(1)–C(6)               | 1.481(4)   | 1.485 | N(2)–C(6)–C(1)   | 116.9(2) | 116.85 |
| C(2)–C(3)               | 1.377(4)   | 1.407 | N(2)–C(6)–C(7)   | 122.2(2) | 121.71 |
| C(3)–C(4)               | 1.392(4)   | 1.406 | N(2)–C(10)–C(9)  | 122.8(3) | 122.94 |
| C(3)–C(16)              | 1.449(4)   | 1.452 | N(3)–C(11)–C(5)  | 117.2(2) | 116.87 |
| C(4)–C(5)               | 1.364(4)   | 1.400 | N(3)–C(11)–C(12) | 121.5(3) | 121.69 |
| C(5)–C(11)              | 1.481(4)   | 1.485 | N(3)–C(15)–C(14) | 123.8(3) | 122.97 |
| C(6)–C(7)               | 1.372(4)   | 1.404 |                  |          |        |
| C(7)–C(8)               | 1.340(4)   | 1.397 |                  |          |        |
| C(8)–C(9)               | 1.337(4)   | 1.400 |                  |          |        |
| C(9)–C(10)              | 1.357(4)   | 1.399 |                  |          |        |
| C(11)–C(12)             | 1.351(4)   | 1.404 |                  |          |        |
| C(12)–C(13)             | 1.296(4)   | 1.397 |                  |          |        |
| C(13)–C(14)             | 1.290(5)   | 1.400 |                  |          |        |
| C(14)–C(15)             | 1.318(5)   | 1.399 |                  |          |        |
| C(16)–O(1)              | 1.359(5)   | 1.405 |                  |          |        |
| C(16)–C(17)             | 1.321(12)  | 1.375 |                  |          |        |
| C(17)–C(18)             | 1.485(19)  | 1.436 |                  |          |        |
| C(18)–C(19)             | 1.23(2)    | 1.366 |                  |          |        |

**Table S2.** Short intra- and intermolecular contacts detected in the structures **1–R<sup>3</sup>**, **1–R<sup>7</sup>** and **1–R<sup>14</sup>**.

| <b>D–H•••A</b>          | <b>D–H</b> | <b>H•••A</b> | <b>D•••A</b><br>[Å] | <b>D–H•••A</b><br>[°] |
|-------------------------|------------|--------------|---------------------|-----------------------|
| <b>1–R<sup>3</sup></b>  |            |              |                     |                       |
| C(2)–H(2)•••N(2)        | 0.93       | 2.47         | 2.790(2)            | 100.00                |
| C(4)–H(4)•••N(3)        | 0.93       | 2.47         | 2.791(3)            | 100.40                |
| C(7)–H(7)•••N(1)        | 0.93       | 2.50         | 2.809(3)            | 99.6                  |
| C(21)–H(21)•••O(1)      | 0.93       | 2.42         | 2.736(3)            | 100.00                |
| C(28)–H(28)•••N(5)      | 0.93       | 2.48         | 2.798(3)            | 99.9                  |
| C(30)–H(30)•••N(6)      | 0.93       | 2.47         | 2.794(2)            | 100.20                |
| C(38)–H(38)•••N(4)      | 0.93       | 2.51         | 2.814(2)            | 99.6                  |
| <b>1–R<sup>7</sup></b>  |            |              |                     |                       |
| C(2)–H(2)•••N(2)        | 0.93       | 2.46         | 2.7829(18)          | 100.40                |
| <b>1–R<sup>14</sup></b> |            |              |                     |                       |
| C(2)–H(2)•••N(2)        | 0.93       | 2.49         | 2.815(4)            | 100.70                |
| C(4)–H(4)•••O(1)        | 0.93       | 2.51         | 2.827(6)            | 99.9                  |
| C(4)–H(4)•••N(3)        | 0.93       | 2.50         | 2.809(4)            | 99.8                  |
| C(7)–H(7)•••N(1)        | 0.93       | 2.48         | 2.794(4)            | 99.6                  |
| C(12)–H(12)•••N(1)      | 0.93       | 2.50         | 2.806(4)            | 99.7                  |

**Table S3.** Calculated Onsager cavity radius ( $a$ ).

|                  | $a$ [Å] |                   | $a$ [Å] |
|------------------|---------|-------------------|---------|
| 1-R <sup>1</sup> | 6.14    | 1-R <sup>9</sup>  | 5.24    |
| 1-R <sup>2</sup> | 5.86    | 1-R <sup>10</sup> | 5.45    |
| 1-R <sup>3</sup> | 5.57    | 1-R <sup>11</sup> | 5.24    |
| 1-R <sup>4</sup> | 5.65    | 1-R <sup>12</sup> | 5.83    |
| 1-R <sup>5</sup> | 5.51    | 1-R <sup>13</sup> | 5.72    |
| 1-R <sup>6</sup> | 5.50    | 1-R <sup>14</sup> | 5.65    |
| 1-R <sup>7</sup> | 5.91    | 1-R <sup>15</sup> | 5.50    |
| 1-R <sup>8</sup> | 5.41    | 1-R <sup>16</sup> | 5.37    |

**Table S4.** Electrochemical properties and optical band gaps of the compounds 1-R<sup>1-16</sup>.

| Compound          | CV <sup>b</sup>      |                     |                        |                        |                     | E <sub>g</sub> <sup>opt</sup> [eV] <sup>a</sup> |
|-------------------|----------------------|---------------------|------------------------|------------------------|---------------------|-------------------------------------------------|
|                   | E <sub>red</sub> [V] | E <sub>ox</sub> [V] | E <sub>HOMO</sub> [eV] | E <sub>LUMO</sub> [eV] | E <sub>g</sub> [eV] |                                                 |
| 1-R <sup>1</sup>  | -2.29                | 0.78                | -5.88                  | -2.81                  | 3.06                | 2.93                                            |
| 1-R <sup>2</sup>  | -2.27                | 1.18                | -6.28                  | -2.83                  | 3.45                | 3.41                                            |
| 1-R <sup>3</sup>  | -2.16                | 0.90<br>1.23        | -6.00                  | -2.94                  | 3.06                | 3.06                                            |
| 1-R <sup>4</sup>  | -2.28                | 1.19                | -6.29                  | -2.82                  | 3.48                | 3.48                                            |
| 1-R <sup>5</sup>  | -2.21<br>-2.46       | 1.25                | -6.35                  | -2.89                  | 3.46                | 3.48                                            |
| 1-R <sup>6</sup>  | -2.11                | 1.08                | -6.18                  | -2.99                  | 3.18                | 2.90                                            |
| 1-R <sup>7</sup>  | -2.26                | 0.36<br>0.60        | -5.46                  | -2.84                  | 2.61                | 2.64                                            |
| 1-R <sup>8</sup>  | -2.07<br>-2.39       | 1.00                | -6.10                  | -3.03                  | 3.07                | 3.48                                            |
| 1-R <sup>9</sup>  | -2.20                | 1.20                | -6.30                  | -2.90                  | 3.40                | 3.50                                            |
| 1-R <sup>10</sup> | -2.36                | 0.73<br>1.00        | -5.83                  | -2.74                  | 3.09                | 2.93                                            |
| 1-R <sup>11</sup> | -2.18                | 1.15                | -6.25                  | -2.92                  | 3.26                | 3.44                                            |
| 1-R <sup>12</sup> | -2.16<br>-2.47       | 0.76<br>1.08        | -5.86                  | -2.95                  | 2.91                | 2.85                                            |
| 1-R <sup>13</sup> | -2.02<br>-2.40       | 1.16                | -6.26                  | -3.08                  | 3.18                | 3.33                                            |
| 1-R <sup>14</sup> | -2.20                | 0.94                | -6.04                  | -2.90                  | 3.14                | 3.46                                            |
| 1-R <sup>15</sup> | -2.14<br>-2.38       | 0.81                | -5.91                  | -2.96                  | 2.95                | 3.09                                            |
| 1-R <sup>16</sup> | -2.21                | 1.16                | -6.26                  | -2.89                  | 3.37                | 3.26                                            |

a. E<sub>g</sub><sup>opt</sup> = 1241/λ<sub>em</sub>b. Measured in CH<sub>2</sub>Cl<sub>2</sub> solution, GC as working electrode, HOMO = -5.1 - E<sub>ox</sub>; LUMO = -5.1 - E<sub>red</sub>; scan rate 100 [mV/s]

**Table S5.** The energies and characters of the selected calculated transitions assigned to the lowest experimental absorption bands of the compounds **1-R<sup>1-16</sup>** (in acetonitrile)

|                        |        | $\lambda_{\text{abs}}$<br>[nm] | Calculated transitions                                |                                                   |                                                           |                                                                                                           |
|------------------------|--------|--------------------------------|-------------------------------------------------------|---------------------------------------------------|-----------------------------------------------------------|-----------------------------------------------------------------------------------------------------------|
|                        |        |                                | $\lambda$ [nm]                                        | $f$                                               | The most important orbital excitations                    | Character                                                                                                 |
| <b>1-R<sup>1</sup></b> | CIS(D) | 385.4                          | 484.4                                                 | 0.0177                                            | H→L (19%), H→L+2 (81%)                                    | $\pi_{\text{R}} \rightarrow \pi_{\text{terpy}}^*$                                                         |
|                        |        |                                | 391.7                                                 | 0.1684                                            | H→L (70%), H→L+2 (18%)                                    | $\pi_{\text{R}} \rightarrow \pi_{\text{R}}^*$                                                             |
|                        | TD     | 385.4                          | 389.3                                                 | 0.1542                                            | H→L (87%)                                                 | $\pi_{\text{R}} \rightarrow \pi_{\text{R}}^*$                                                             |
|                        |        |                                | 369.3                                                 | 0.0300                                            | H→L+2 (87%)                                               | $\pi_{\text{R}} \rightarrow \pi_{\text{terpy}}^*$                                                         |
| <b>1-R<sup>2</sup></b> | CIS(D) | 288.1                          | 374.0                                                 | 0.3403                                            | H→L (88%)                                                 | $\pi_{\text{R}} \rightarrow \pi_{\text{terpy}}^*$                                                         |
|                        |        |                                | 339.3                                                 | 0.1276                                            | H-2→L (78%)                                               | $\pi_{\text{terpy}} \rightarrow \pi_{\text{terpy}}^*$                                                     |
|                        |        |                                | 315.9                                                 | 0.2246                                            | H→L+2 (58%), H→L+3 (33%)                                  | $\pi_{\text{R}} \rightarrow \pi_{\text{terpy}}^*$                                                         |
|                        |        |                                | 310.5                                                 | 0.1494                                            | H-6→L+1 (29%), H-2→L+1 (46%)                              | $\pi_{\text{terpy}} \rightarrow \pi_{\text{terpy}}^*$                                                     |
|                        |        |                                | 307.8                                                 | 0.0557                                            | H-6→L+1 (70%), H-2→L+1 (17%)                              | $\pi_{\text{terpy}} \rightarrow \pi_{\text{terpy}}^*$                                                     |
|                        | TD     | 288.1                          | 311.9                                                 | 0.8069                                            | H→L (97%)                                                 | $\pi_{\text{R}} \rightarrow \pi_{\text{terpy}}^*$                                                         |
|                        |        |                                | 294.5                                                 | 0.2528                                            | H-1→L (55%), H→L+1 (41%)                                  | $\pi_{\text{terpy}} \rightarrow \pi_{\text{terpy}}^*$ , $\pi_{\text{R}} \rightarrow \pi_{\text{terpy}}^*$ |
|                        |        |                                | 278.5                                                 | 0.3465                                            | H-1→L+1 (89%)                                             | $\pi_{\text{terpy}} \rightarrow \pi_{\text{terpy}}^*$                                                     |
| <b>1-R<sup>3</sup></b> | CIS(D) | 325.9                          | 438.6                                                 | 0.1203                                            | H→L (63%), H→L+1 (27%)                                    | $\pi_{\text{R}} \rightarrow \pi_{\text{terpy}}^*$                                                         |
|                        |        |                                | 333.7                                                 | 0.1198                                            | H-2→L (52%)                                               | $\pi_{\text{terpy}} \rightarrow \pi_{\text{terpy}}^*$                                                     |
|                        |        |                                | 324.0                                                 | 0.1458                                            | H→L+2 (28%) H-4→L+1 (25%), H-4→L (19%)                    | $\pi_{\text{R}} \rightarrow \pi_{\text{R}}^*$ , $\pi_{\text{terpy}} \rightarrow \pi_{\text{terpy}}^*$     |
|                        |        |                                | 320.2                                                 | 0.1512                                            | H-4→L (29%), H-4→L+1 (16%), H→L+2 (24%)                   | $\pi_{\text{terpy}} \rightarrow \pi_{\text{terpy}}^*$ , $\pi_{\text{R}} \rightarrow \pi_{\text{R}}^*$     |
|                        | TD     | 325.9                          | 350.3                                                 | 0.2308                                            | H→L (90%)                                                 | $\pi_{\text{R}} \rightarrow \pi_{\text{terpy}}^*$                                                         |
|                        |        |                                | 289.0                                                 | 0.1038                                            | H-2→L (35%), H-1→L (19%)                                  | $\pi_{\text{terpy}} \rightarrow \pi_{\text{terpy}}^*$                                                     |
| <b>1-R<sup>4</sup></b> | CIS(D) | 329.6                          | 346.7                                                 | 0.0544                                            | H-3→L+1 (39%), H-1→L (55%)                                | $\pi_{\text{terpy}} \rightarrow \pi_{\text{terpy}}^*$ , $\pi_{\text{R}} \rightarrow \pi_{\text{terpy}}^*$ |
|                        |        |                                | 320.0                                                 | 0.1175                                            | H-3→L+1 (52%), H-1→L (26%)                                | $\pi_{\text{terpy}} \rightarrow \pi_{\text{terpy}}^*$ , $\pi_{\text{R}} \rightarrow \pi_{\text{terpy}}^*$ |
|                        |        |                                | 319.3                                                 | 0.2125                                            | H-3→L (73%)                                               | $\pi_{\text{terpy}} \rightarrow \pi_{\text{terpy}}^*$                                                     |
|                        | TD     | 329.6                          | 306.1                                                 | 0.1778                                            | H→L (83%)                                                 | $\pi_{\text{terpy}} \rightarrow \pi_{\text{terpy}}^*$                                                     |
|                        |        |                                | 278.4                                                 | 0.5440                                            | H→L+1 (79%)                                               | $\pi_{\text{terpy}} \rightarrow \pi_{\text{terpy}}^*$                                                     |
|                        |        | 289.0                          | 272.8                                                 | 0.2344                                            | H-1→L (83%)                                               | $\pi_{\text{R}} \rightarrow \pi_{\text{terpy}}^*$                                                         |
| 271.4                  | 0.3275 |                                | H-1→L+1 (80%)                                         | $\pi_{\text{R}} \rightarrow \pi_{\text{terpy}}^*$ |                                                           |                                                                                                           |
| <b>1-R<sup>5</sup></b> | CIS(D) | 331.8                          | 327.5                                                 | 0.2512                                            | H-3→L (80%)                                               | $\pi_{\text{terpy}} \rightarrow \pi_{\text{terpy}}^*$                                                     |
|                        |        |                                | 325.4                                                 | 0.1241                                            | H-3→L+1 (43%), H-1→L (37%)                                | $\pi_{\text{terpy}} \rightarrow \pi_{\text{terpy}}^*$ , $\pi_{\text{R}} \rightarrow \pi_{\text{terpy}}^*$ |
|                        |        |                                | 308.9                                                 | 0.1895                                            | H-1→L+1 (69%)                                             | $\pi_{\text{R}} \rightarrow \pi_{\text{terpy}}^*$                                                         |
|                        | TD     | 331.8                          | 306.6                                                 | 0.1699                                            | H→L (81%)                                                 | $\pi_{\text{terpy}} \rightarrow \pi_{\text{terpy}}^*$                                                     |
|                        |        |                                | 280.1                                                 | 0.7924                                            | H-1→L (52%), H→L+1 (40%)                                  | $\pi_{\text{R}} \rightarrow \pi_{\text{terpy}}^*$                                                         |
|                        |        | 288.6                          | 0.2801                                                | H-1→L+1 (80%)                                     | $\pi_{\text{R}} \rightarrow \pi_{\text{terpy}}^*$         |                                                                                                           |
| <b>1-R<sup>6</sup></b> | CIS(D) | 343.4                          | <b>344.7</b>                                          | <b>0.0738</b>                                     | <b>H-3→L+1 (32%), H-1→L (62%)</b>                         | <b><math>\pi_{\text{terpy}} \rightarrow \pi_{\text{terpy}}^*</math></b>                                   |
|                        |        |                                | 316.3                                                 | 0.0944                                            | H-3→L+1 (40%), H-3→L (14%), H-1→L (13%)                   | $\pi_{\text{terpy}} \rightarrow \pi_{\text{terpy}}^*$                                                     |
|                        |        |                                | 315.4                                                 | 0.1250                                            | H-4→L (11%), H-3→L (44%), H-3→L+1 (14%)                   | $\pi_{\text{terpy}} \rightarrow \pi_{\text{terpy}}^*$                                                     |
|                        | TD     | 343.4                          | 305.9                                                 | 0.1992                                            | H→L (85%)                                                 | $\pi_{\text{terpy}} \rightarrow \pi_{\text{terpy}}^*$                                                     |
|                        |        |                                | 277.4                                                 | 0.2426                                            | H-3→L (28%), H→L+1 (54%)                                  | $\pi_{\text{terpy}} \rightarrow \pi_{\text{terpy}}^*$                                                     |
|                        |        | 287.6                          | 276.7                                                 | 0.1376                                            | H-3→L (40%), H→L+1 (39%)                                  | $\pi_{\text{terpy}} \rightarrow \pi_{\text{terpy}}^*$                                                     |
|                        |        |                                | 267.8                                                 | 0.2686                                            | H-1→L (82%)                                               | $\pi_{\text{terpy}} \rightarrow \pi_{\text{terpy}}^*$                                                     |
| 266.8                  | 0.3817 | H-1→L+1 (76%)                  | $\pi_{\text{terpy}} \rightarrow \pi_{\text{terpy}}^*$ |                                                   |                                                           |                                                                                                           |
| <b>1-R<sup>7</sup></b> | CIS(D) | 432.3                          | 494.7                                                 | 0.2217                                            | H→L+1 (91%)                                               | $\pi_{\text{R}} \rightarrow \pi_{\text{terpy}}^*$                                                         |
|                        |        |                                | 418.8                                                 | 0.0653                                            | H→L+2 (94%)                                               | $\pi_{\text{R}} \rightarrow \pi_{\text{terpy}}^*$                                                         |
|                        |        | 351.9                          | 330.7                                                 | 0.1204                                            | H-2→L+1 (74%)                                             | $\pi_{\text{terpy}} \rightarrow \pi_{\text{terpy}}^*$                                                     |
|                        |        |                                | 325.9                                                 | 0.7213                                            | H→L+4 (70%)                                               | $\pi_{\text{R}} \rightarrow \pi_{\text{terpy}}^*$                                                         |
|                        | TD     | 432.3                          | 400.7                                                 | 0.0004                                            | H→L (99%)                                                 | $\pi_{\text{R}} \rightarrow \pi_{\text{terpy}}^*$                                                         |
|                        |        |                                | 351.9                                                 | 0.4182                                            | H→L+1 (99%)                                               | $\pi_{\text{R}} \rightarrow \pi_{\text{terpy}}^*$                                                         |
| <b>1-R<sup>8</sup></b> | CIS(D) | 314.7                          | 352.3                                                 | 0.0972                                            | H-3→L (67%), H-1→L (18%)                                  | $\pi_{\text{terpy}} \rightarrow \pi_{\text{terpy}}^*$ , $\pi_{\text{R}} \rightarrow \pi_{\text{terpy}}^*$ |
|                        |        |                                | 311.0                                                 | 0.0697                                            | H-6→L (16%), H-5→L (29%), H-3→L+1 (31%),<br>H-1→L+1 (14%) | $\pi_{\text{terpy}} \rightarrow \pi_{\text{terpy}}^*$ , $\pi_{\text{R}} \rightarrow \pi_{\text{terpy}}^*$ |

|                         |        |       |        |                          |                                                                                                       |                                                                                                                    |
|-------------------------|--------|-------|--------|--------------------------|-------------------------------------------------------------------------------------------------------|--------------------------------------------------------------------------------------------------------------------|
|                         |        |       | 298.8  | 0.0348                   | H-2→L+2 (52%)                                                                                         | $\pi_{\text{terpy}} \rightarrow \pi_{\text{terpy}}^*$                                                              |
|                         | TD     | 314.7 | 312.4  | 0.1961                   | H→L (92%)                                                                                             | $\pi_{\text{terpy}} \rightarrow \pi_{\text{terpy}}^*$                                                              |
| <b>1-R<sup>9</sup></b>  | CIS(D) | 327.4 | 358.0  | 0.0986                   | H-1→L (65%)                                                                                           | $\pi_{\text{terpy}} \rightarrow \pi_{\text{terpy}}^*$                                                              |
|                         |        |       | 313.3  | 0.0664                   | H-6→L (33%), H-1→L+1 (42%)                                                                            | $\pi_{\text{terpy}} \rightarrow \pi_{\text{terpy}}^*$                                                              |
|                         |        |       | 301.7  | 0.2189                   | H-4→L+1 (47%)                                                                                         | $\pi_{\text{terpy}} \rightarrow \pi_{\text{terpy}}^*$                                                              |
|                         |        |       | 300.8  | 0.0863                   | H-6→L+1 (24%), H-1→L+2 (34%)                                                                          | $\pi_{\text{terpy}} \rightarrow \pi_{\text{terpy}}^*$                                                              |
|                         | TD     | 327.4 | 317.1  | 0.1839                   | H→L (90%)                                                                                             | $\pi_{\text{terpy}} \rightarrow \pi_{\text{terpy}}^*$                                                              |
| <b>1-R<sup>10</sup></b> | CIS(D) | 378.4 | 401.2  | 0.1598                   | H→L+1 (78%)                                                                                           | $\pi_{\text{R}} \rightarrow \pi_{\text{terpy}}^*$                                                                  |
|                         |        |       | 354.9  | 0.0565                   | H→L+2 (91%)                                                                                           | $\pi_{\text{R}} \rightarrow \pi_{\text{terpy}}^*$                                                                  |
|                         | TD     | 378.4 | 353.2  | 0.0021                   | H→L (59%), H→L+1 (37%)                                                                                | $\pi_{\text{R}} \rightarrow \pi_{\text{terpy}}^*$                                                                  |
|                         |        |       | 335.28 | 0.3172                   | H→L (39%), H→L+1 (60%)                                                                                | $\pi_{\text{R}} \rightarrow \pi_{\text{terpy}}^*$                                                                  |
| <b>1-R<sup>11</sup></b> | CIS(D) | 343.4 | 358.1  | 0.0310                   | H-2→L+1 (33%), H-1→L (33%), H-1→L+1 (15%)                                                             | $\pi_{\text{terpy}} \rightarrow \pi_{\text{terpy}}^*$ , $\pi_{\text{R}} \rightarrow \pi_{\text{terpy}}^*$          |
|                         |        |       | 330.6  | 0.0655                   | H-1→L (37%), H-2→L (20%), H-5→L (10%)                                                                 | $\pi_{\text{R}} \rightarrow \pi_{\text{terpy}}^*$ , $\pi_{\text{terpy}} \rightarrow \pi_{\text{terpy}}^*$          |
|                         |        |       | 322.8  | 0.1509                   | H-2→L+1 (43%), H-2→L (19%), H-1→L (11%)                                                               | $\pi_{\text{terpy}} \rightarrow \pi_{\text{terpy}}^*$ , $\pi_{\text{R}} \rightarrow \pi_{\text{terpy}}^*$          |
|                         | TD     | 343.4 | 314.8  | 0.1181                   | H-1→L+1 (21%), H→L (75%)                                                                              | $\pi_{\text{R}} \rightarrow \pi_{\text{terpy}}^*$ , $\pi_{\text{terpy}} \rightarrow \pi_{\text{terpy}}^*$          |
| <b>1-R<sup>12</sup></b> | CIS(D) | 354.6 | 427.7  | 0.6143                   | H→L (74%)                                                                                             | $\pi_{\text{R}} \rightarrow \pi_{\text{R/terpy}}^*$                                                                |
|                         |        |       | 368.4  | 0.0791                   | H-2→L (86%)                                                                                           | $\pi_{\text{terpy}} \rightarrow \pi_{\text{R/terpy}}^*$                                                            |
|                         |        |       | 360.5  | 0.3430                   | H→L+3 (49%), H→L+2 (39%),                                                                             | $\pi_{\text{R}} \rightarrow \pi_{\text{terpy}}^*$                                                                  |
|                         |        |       | 337.1  | 0.5199                   | H→L+3 (42%), H→L+2 (22%),                                                                             | $\pi_{\text{R}} \rightarrow \pi_{\text{terpy}}^*$                                                                  |
|                         | TD     | 354.6 | 378.9  | 0.9871                   | H→L (99%)                                                                                             | $\pi_{\text{R}} \rightarrow \pi_{\text{R/terpy}}^*$                                                                |
|                         |        |       | 351.4  | 0.0017                   | H→L+1 (87%)                                                                                           | $\pi_{\text{R}} \rightarrow \pi_{\text{terpy}}^*$                                                                  |
| <b>1-R<sup>13</sup></b> | CIS(D) | 315.0 | 354.7  | 0.3611                   | H-2→L (44%), H-4→L (23%), H→L (11%)                                                                   | $\pi_{\text{R/terpy}} \rightarrow \pi_{\text{terpy}}^*$ ,<br>$\pi_{\text{terpy}} \rightarrow \pi_{\text{terpy}}^*$ |
|                         |        |       | 341.6  | 0.1075                   | H-2→L+1 (30%), H-4→L (29%),                                                                           | $\pi_{\text{R/terpy}} \rightarrow \pi_{\text{terpy}}^*$ ,<br>$\pi_{\text{terpy}} \rightarrow \pi_{\text{terpy}}^*$ |
|                         |        |       | 321.5  | 0.228                    | H→L+2 (54%), H→L+3 (30%)                                                                              | $\pi_{\text{R}} \rightarrow \pi_{\text{terpy}}^*$                                                                  |
|                         |        |       | 314.4  | 0.0706                   | H-6→L (50%), H-4→L+1 (18%), H→L+3 (10%)                                                               | $\pi_{\text{terpy}} \rightarrow \pi_{\text{terpy}}^*$ , $\pi_{\text{R}} \rightarrow \pi_{\text{terpy}}^*$          |
|                         |        |       | 302.0  | 0.0592                   | H-2→L+2 (39%), H-6→L+1 (23%)                                                                          | $\pi_{\text{R/terpy}} \rightarrow \pi_{\text{terpy}}^*$                                                            |
|                         | TD     | 315.0 | 326.9  | 0.1397                   | H-1→L (39%), H→L+1 (41%)                                                                              | $\pi_{\text{terpy}} \rightarrow \pi_{\text{terpy}}^*$ , $\pi_{\text{R}} \rightarrow \pi_{\text{terpy}}^*$          |
|                         |        |       | 311.8  | 0.1416                   | H-3→L (56%), H-2→L (27%)                                                                              | $\pi_{\text{terpy}} \rightarrow \pi_{\text{terpy}}^*$ ,<br>$\pi_{\text{R/terpy}} \rightarrow \pi_{\text{terpy}}^*$ |
| <b>1-R<sup>14</sup></b> | CIS(D) | 342.7 | 347.4  | 0.2045                   | H→L (70%)                                                                                             | $\pi_{\text{R}} \rightarrow \pi_{\text{terpy}}^*$                                                                  |
|                         |        |       | 331.9  | 0.1941                   | H-2→L (70%)                                                                                           | $\pi_{\text{terpy}} \rightarrow \pi_{\text{terpy}}^*$                                                              |
|                         |        |       | 312.3  | 0.0573                   | H→L+2 (71%)                                                                                           | $\pi_{\text{terpy}} \rightarrow \pi_{\text{terpy}}^*$                                                              |
|                         |        |       | 308.1  | 0.2242                   | H-2→L+1 (66%)                                                                                         | $\pi_{\text{terpy}} \rightarrow \pi_{\text{terpy}}^*$                                                              |
|                         | TD     | 342.7 | 320.8  | 0.0366                   | H-1→L (41%), H→L+1 (57%)                                                                              | $\pi_{\text{terpy}} \rightarrow \pi_{\text{terpy}}^*$ , $\pi_{\text{R}} \rightarrow \pi_{\text{R}}^*$              |
|                         |        |       | 304.2  | 0.5190                   | H→L (97%)                                                                                             | $\pi_{\text{R}} \rightarrow \pi_{\text{terpy}}^*$                                                                  |
|                         |        | 292.5 | 0.3563 | H-1→L (56%), H→L+1 (42%) | $\pi_{\text{terpy}} \rightarrow \pi_{\text{terpy}}^*$ , $\pi_{\text{R}} \rightarrow \pi_{\text{R}}^*$ |                                                                                                                    |
|                         |        |       | 276.5  | 0.2544                   | H-1→L+1 (93%)                                                                                         | $\pi_{\text{terpy}} \rightarrow \pi_{\text{R}}^*$                                                                  |

|                         |        |       |       |        |                            |                                                       |
|-------------------------|--------|-------|-------|--------|----------------------------|-------------------------------------------------------|
| <b>1-R<sup>15</sup></b> | CIS(D) | 350.5 | 327.7 | 0.1113 | H-2→L+1 (73%)              | $\pi_{\text{terpy}} \rightarrow \pi_{\text{terpy}}^*$ |
|                         |        |       | 310.4 | 0.1664 | H-2→L (58%)                | $\pi_{\text{terpy}} \rightarrow \pi_{\text{terpy}}^*$ |
|                         | TD     | 350.5 | 337.4 | 0.0411 | H→L (99%)                  | $\pi_{\text{R}} \rightarrow \pi_{\text{terpy}}^*$     |
|                         |        |       | 327.9 | 0.0343 | H→L+1 (99%)                | $\pi_{\text{R}} \rightarrow \pi_{\text{terpy}}^*$     |
| <b>1-R<sup>16</sup></b> | CIS(D) | 313.0 | 418.1 | 0.1915 | H→L (68%), H→L+2 (23%)     | $\pi_{\text{R}} \rightarrow \pi_{\text{terpy}}^*$     |
|                         |        |       | 371.0 | 0.0813 | H→L+2 (52%)                | $\pi_{\text{R}} \rightarrow \pi_{\text{terpy}}^*$     |
|                         |        |       | 344.5 | 0.0844 | H-2→L (64%), H-4→L+1 (29%) | $\pi_{\text{terpy}} \rightarrow \pi_{\text{terpy}}^*$ |
|                         |        |       | 325.1 | 0.0708 | H-4→L (57%), H-4→L+1 (13%) | $\pi_{\text{terpy}} \rightarrow \pi_{\text{terpy}}^*$ |
|                         | TD     | 313.0 | 353.2 | 0.4717 | H→L (96%)                  | $\pi_{\text{R}} \rightarrow \pi_{\text{terpy}}^*$     |
|                         |        |       | 303.1 | 0.2749 | H-1→L (89%)                | $\pi_{\text{terpy}} \rightarrow \pi_{\text{terpy}}^*$ |
|                         |        |       | 291.9 | 0.1808 | H→L+2 (94%)                | $\pi_{\text{R}} \rightarrow \pi_{\text{terpy}}^*$     |
|                         |        |       | 279.8 | 0.1788 | H-1→L+1 (63%)              | $\pi_{\text{terpy}} \rightarrow \pi_{\text{terpy}}^*$ |



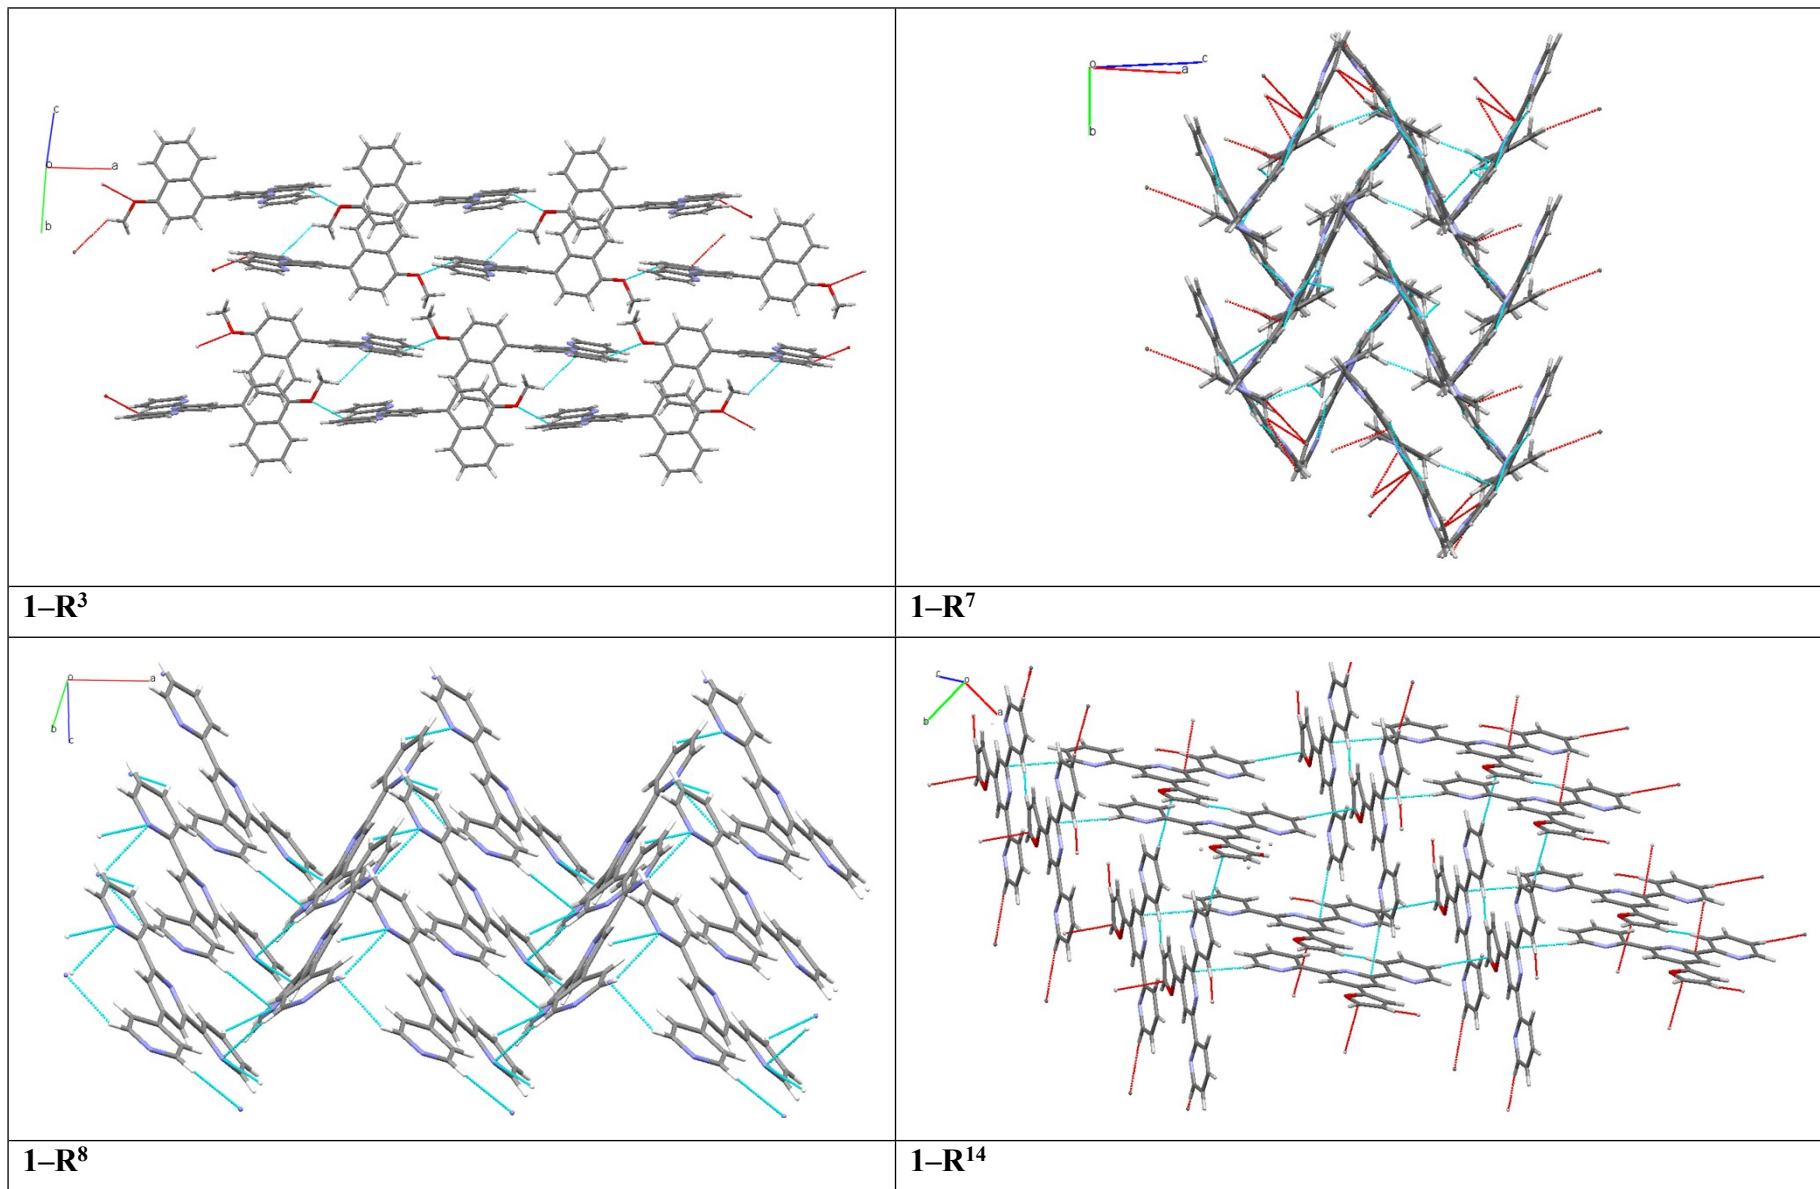

**Figure S1:** View of the packing of **1-R<sup>3</sup>**, **1-R<sup>7</sup>**, **1-R<sup>8</sup>** and **1-R<sup>14</sup>** showing short intra- and intermolecular C—H•••O and C—H•••N contacts.

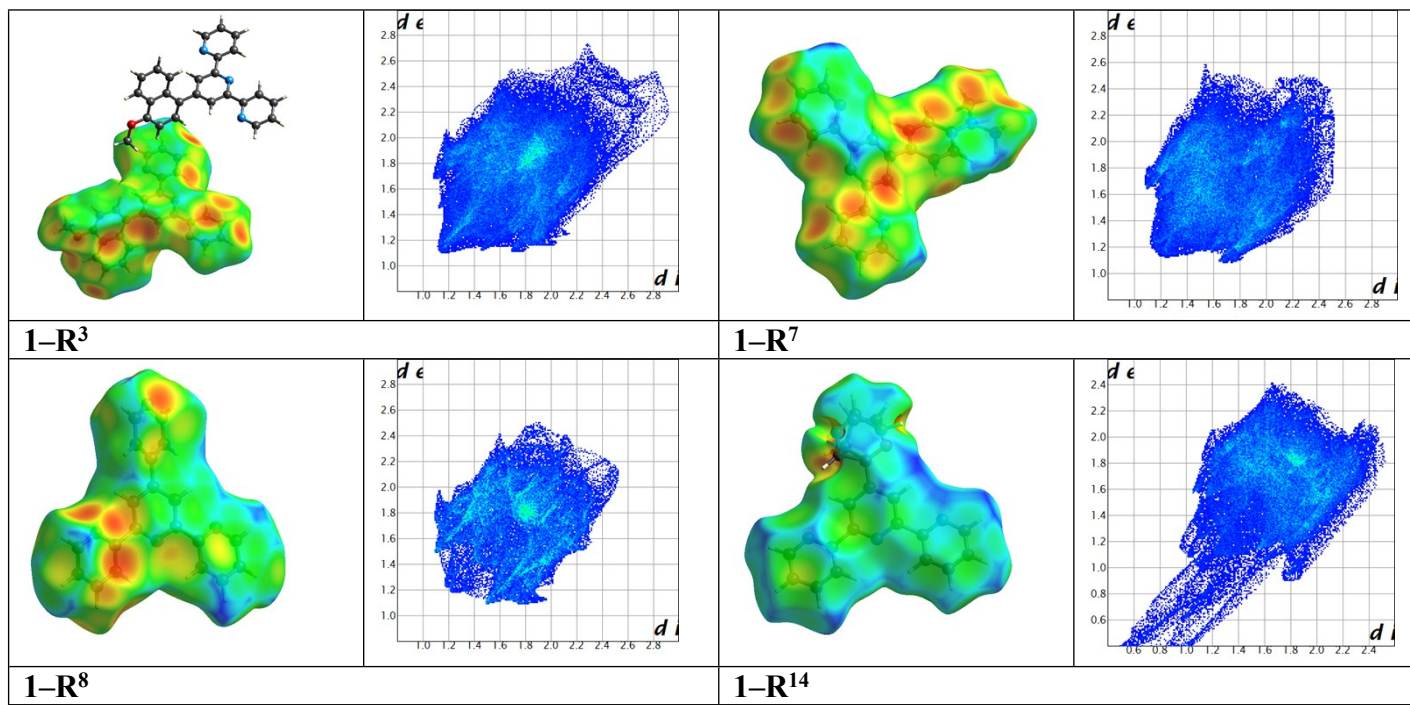

**Figure S2.** Hirshfeld surfaces, 2D fingerprint plots and percentage contributions to the Hirshfeld surface area for the various close intermolecular contacts for molecules of 1-R<sup>3</sup>, 1-R<sup>7</sup> and 1-R<sup>14</sup> compounds.

**Figure S3.** Plot of difference between absorption and fluorescence wavenumber  $\Delta\bar{\nu}_{st}$  vs. solvent polarity parameter  $\Delta f$  for **1-R<sup>4</sup>**.

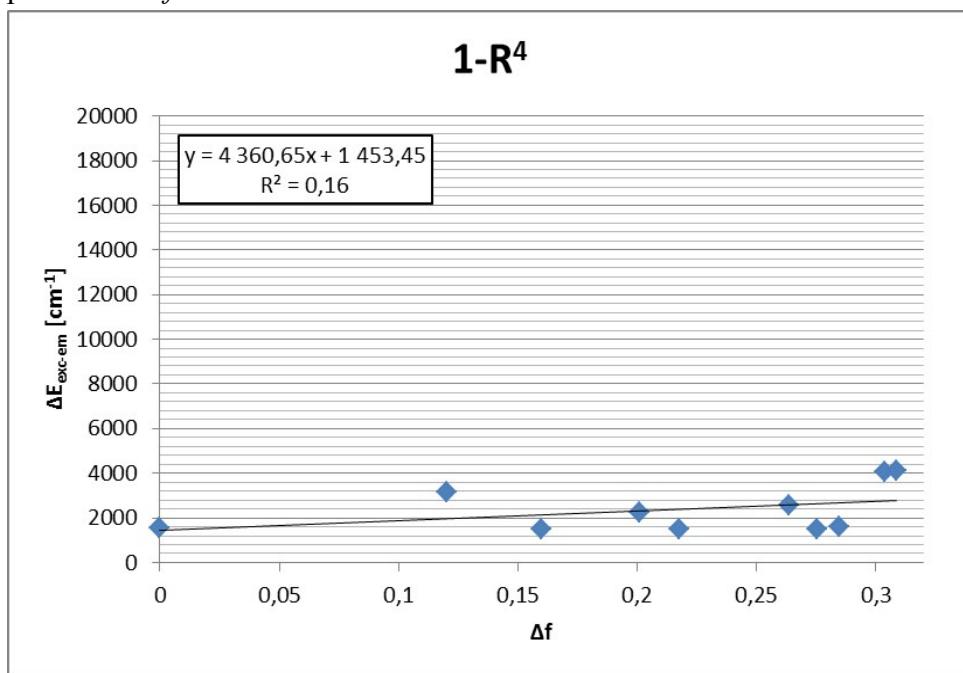

| Solvent               | $\Delta f$ |
|-----------------------|------------|
| Methanol              | 0.309      |
| Acetonitrile          | 0.304      |
| Acetone               | 0.285      |
| N,N-dimethylformamide | 0.275      |
| Dimethyl sulfoxide    | 0.264      |
| Dichloromethane       | 0.218      |
| Ethyl acetate         | 0.201      |
| Diethyl ether         | 0.160      |
| Dipropyl ether        | 0.120      |
| Cyclohexane           | 0.0        |

**Figure S4.** Plot of difference between absorption and fluorescence wavenumber  $\Delta\bar{\nu}_{st}$  vs. solvent polarity parameter  $\Delta f$  for **1-R<sup>7</sup>**.

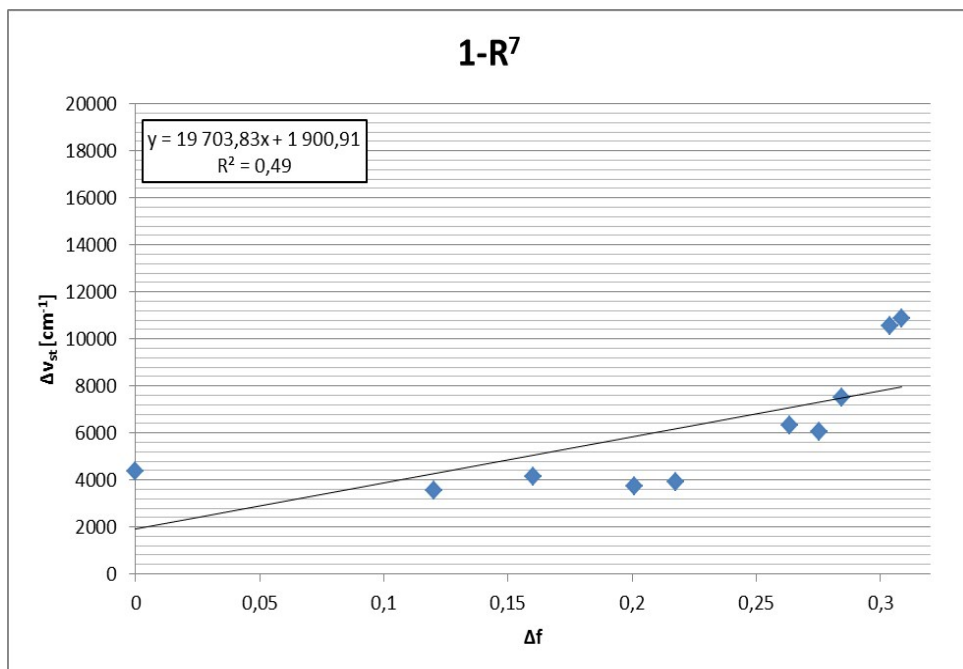

| Solvent               | $\Delta f$ |
|-----------------------|------------|
| Methanol              | 0.309      |
| Acetonitrile          | 0.304      |
| Acetone               | 0.285      |
| N,N-dimethylformamide | 0.275      |
| Dimethyl sulfoxide    | 0.264      |
| Dichloromethane       | 0.218      |
| Ethyl acetate         | 0.201      |
| Diethyl ether         | 0.160      |
| Dipropyl ether        | 0.120      |
| Cyclohexane           | 0.0        |

**Figure S5.** Plot of difference between absorption and fluorescence wavenumber  $\Delta\bar{\nu}_{st}$  vs. solvent polarity parameter  $\Delta f$  for **1-R<sup>9</sup>**.

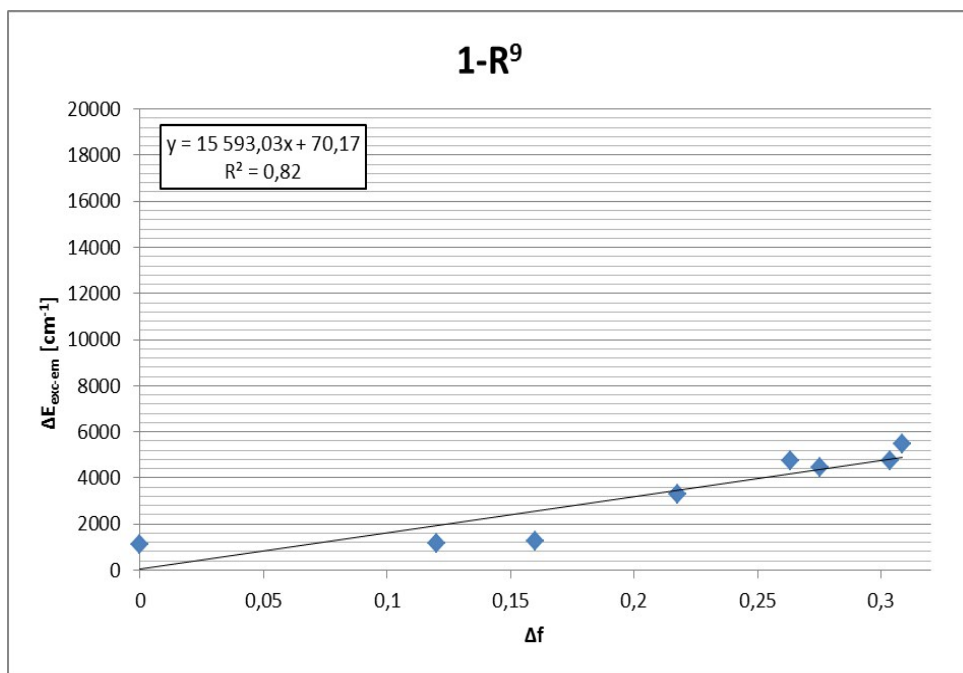

| Solvent               | $\Delta f$ |
|-----------------------|------------|
| Methanol              | 0.309      |
| Acetonitrile          | 0.304      |
| Acetone               | 0.285      |
| N,N-dimethylformamide | 0.275      |
| Dimethyl sulfoxide    | 0.264      |
| Dichloromethane       | 0.218      |
| Ethyl acetate         | 0.201      |
| Diethyl ether         | 0.160      |
| Dipropyl ether        | 0.120      |
| Cyclohexane           | 0.0        |

**Figure S6.** Plot of difference between absorption and fluorescence wavenumber  $\Delta\bar{\nu}_{st}$  vs. solvent polarity parameter  $\Delta f$  for **1-R<sup>10</sup>**.

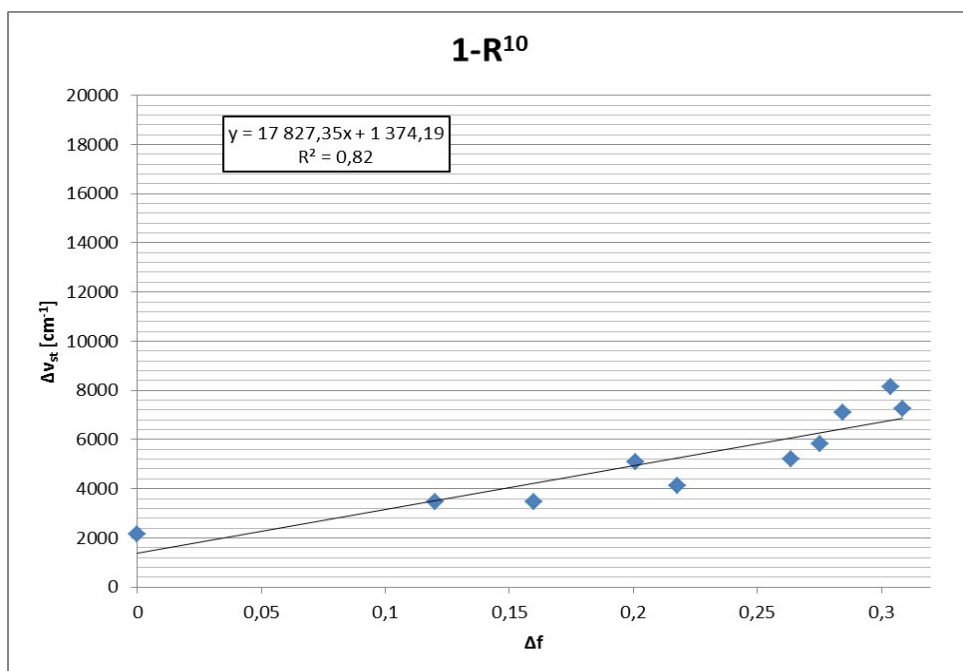

| Solvent               | $\Delta f$ |
|-----------------------|------------|
| Methanol              | 0.309      |
| Acetonitrile          | 0.304      |
| Acetone               | 0.285      |
| N,N-dimethylformamide | 0.275      |
| Dimethyl sulfoxide    | 0.264      |
| Dichloromethane       | 0.218      |
| Ethyl acetate         | 0.201      |
| Diethyl ether         | 0.160      |
| Dipropyl ether        | 0.120      |
| Cyclohexane           | 0.0        |

**Figure S7.** Plot of difference between absorption and fluorescence wavenumber  $\Delta\bar{\nu}_{st}$  vs. solvent polarity parameter  $\Delta f$  for **1-R<sup>11</sup>**.

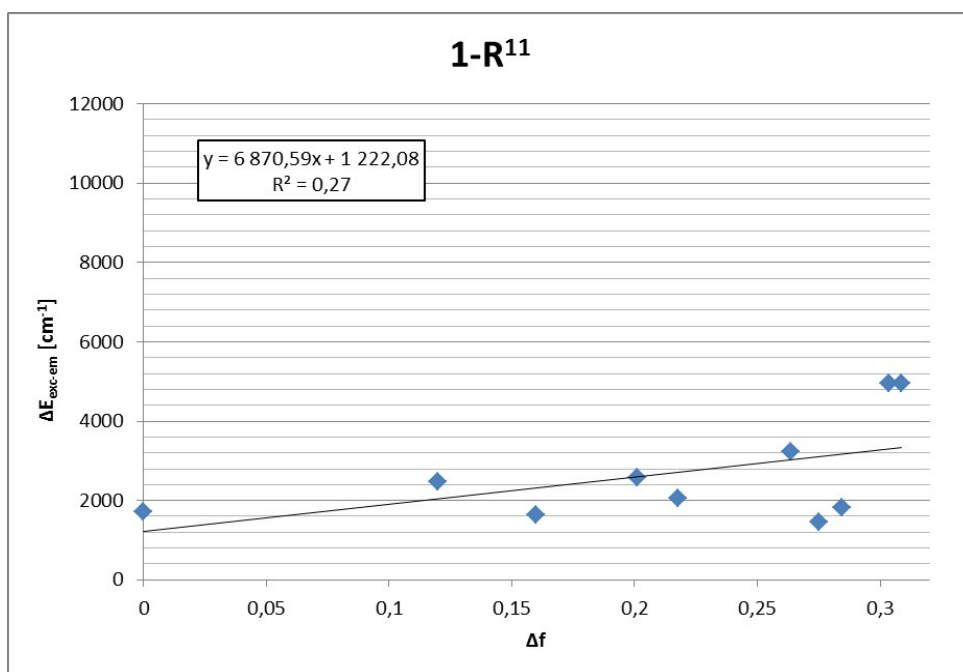

| Solvent               | $\Delta f$ |
|-----------------------|------------|
| Methanol              | 0.309      |
| Acetonitrile          | 0.304      |
| Acetone               | 0.285      |
| N,N-dimethylformamide | 0.275      |
| Dimethyl sulfoxide    | 0.264      |
| Dichloromethane       | 0.218      |
| Ethyl acetate         | 0.201      |
| Diethyl ether         | 0.160      |
| Dipropyl ether        | 0.120      |
| Cyclohexane           | 0.0        |

**Figure S8.** Plot of difference between absorption and fluorescence wavenumber  $\Delta\bar{\nu}_{st}$  vs. solvent polarity parameter  $\Delta f$  for **1-R<sup>14</sup>**.

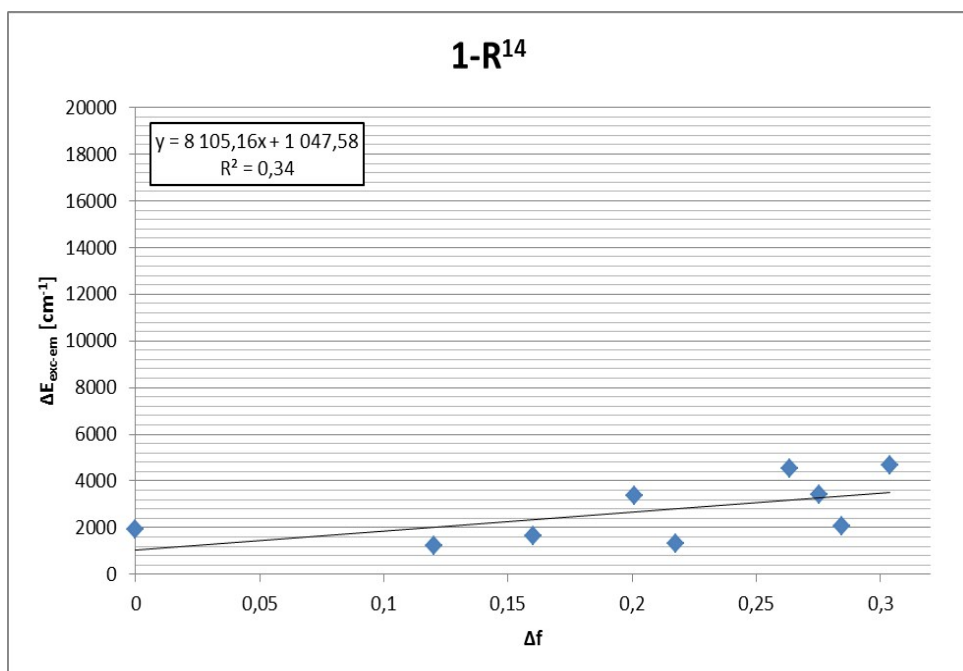

| Solvent               | $\Delta f$ |
|-----------------------|------------|
| Methanol              | 0.309      |
| Acetonitrile          | 0.304      |
| Acetone               | 0.285      |
| N,N-dimethylformamide | 0.275      |
| Dimethyl sulfoxide    | 0.264      |
| Dichloromethane       | 0.218      |
| Ethyl acetate         | 0.201      |
| Diethyl ether         | 0.160      |
| Dipropyl ether        | 0.120      |
| Cyclohexane           | 0.0        |

**Figure S9.** Frontier molecular orbitals of **1-R<sup>1-16</sup>** calculated at DFT/B3LYP level using the polarizable continuum model (MeCN).

| Compound               | HOMO (energy in eV)                                                                               | LUMO                                                                                               |
|------------------------|---------------------------------------------------------------------------------------------------|----------------------------------------------------------------------------------------------------|
| <b>1-R<sup>1</sup></b> | 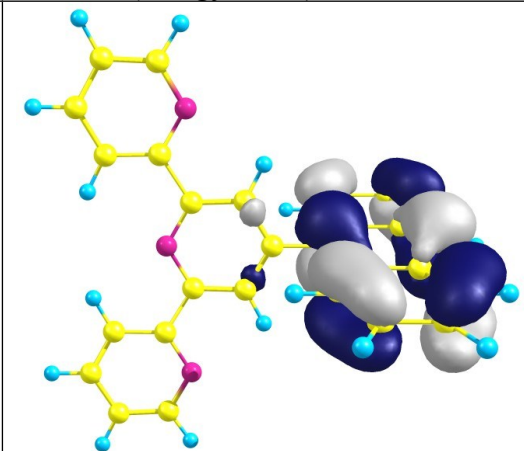<br>(-5.34 eV)   | <br>(-1.80 eV)   |
| <b>1-R<sup>2</sup></b> | <br>(-6.07 eV)  | <br>(-1.71 eV)  |
| <b>1-R<sup>3</sup></b> | <br>(-5.61 eV) | <br>(-1.60 eV) |

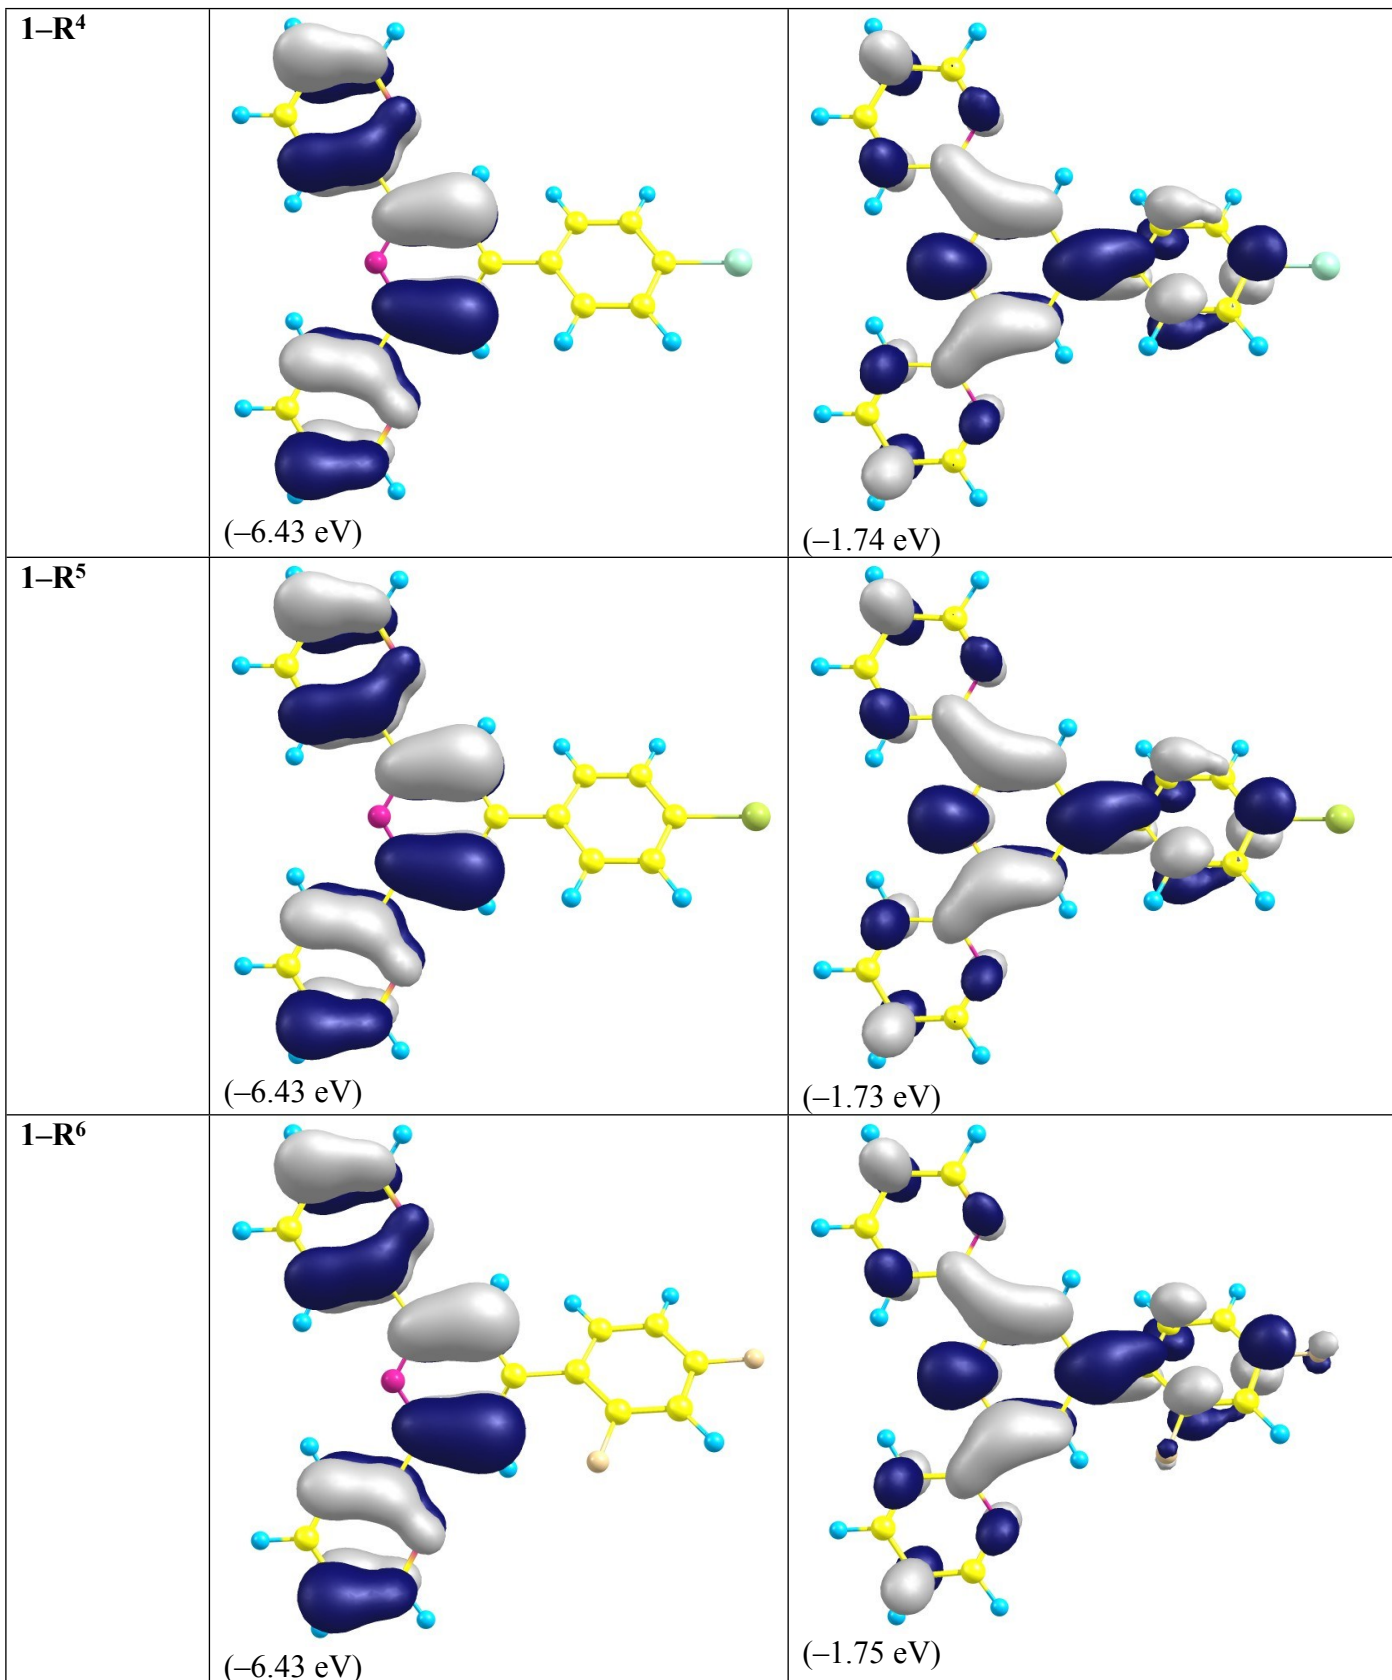

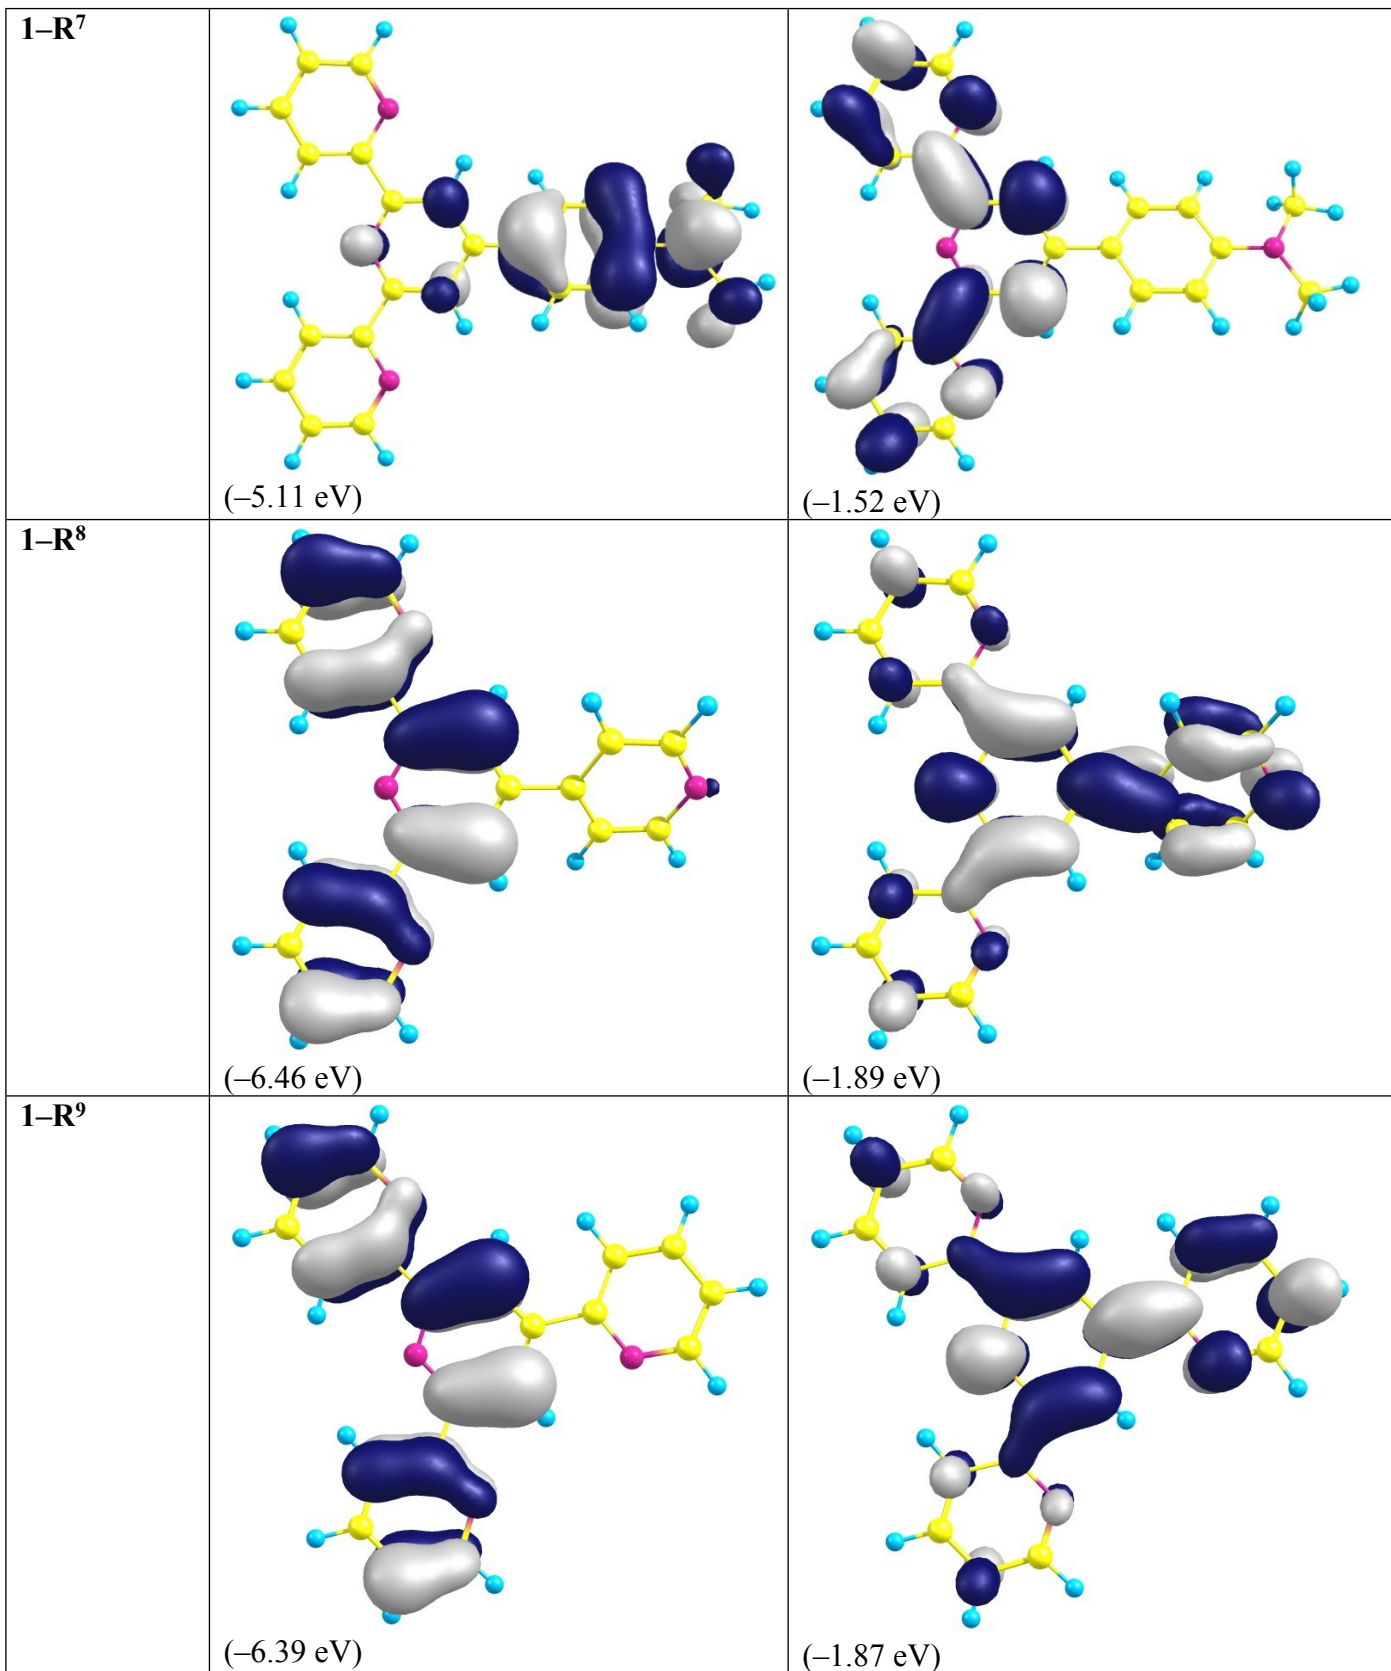



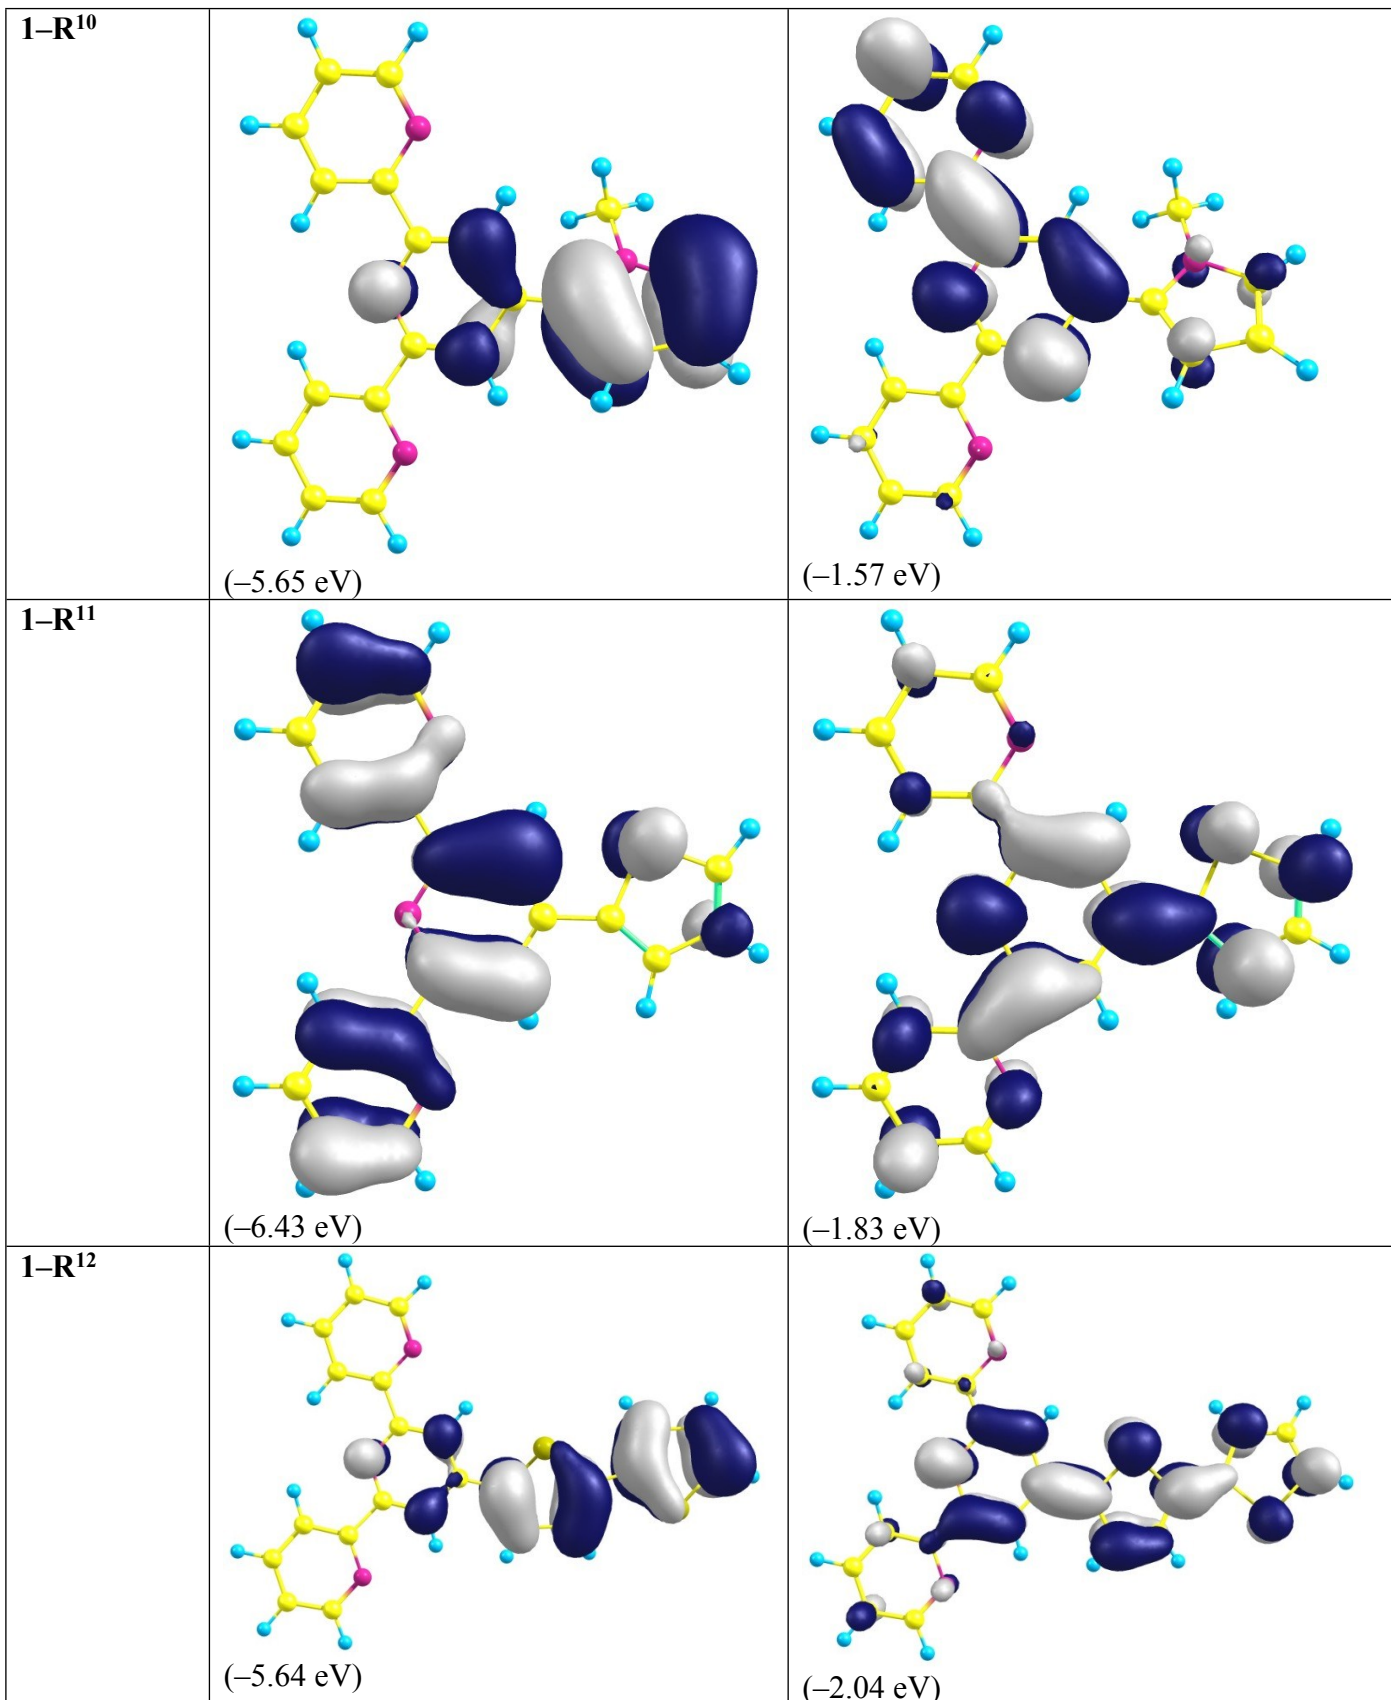

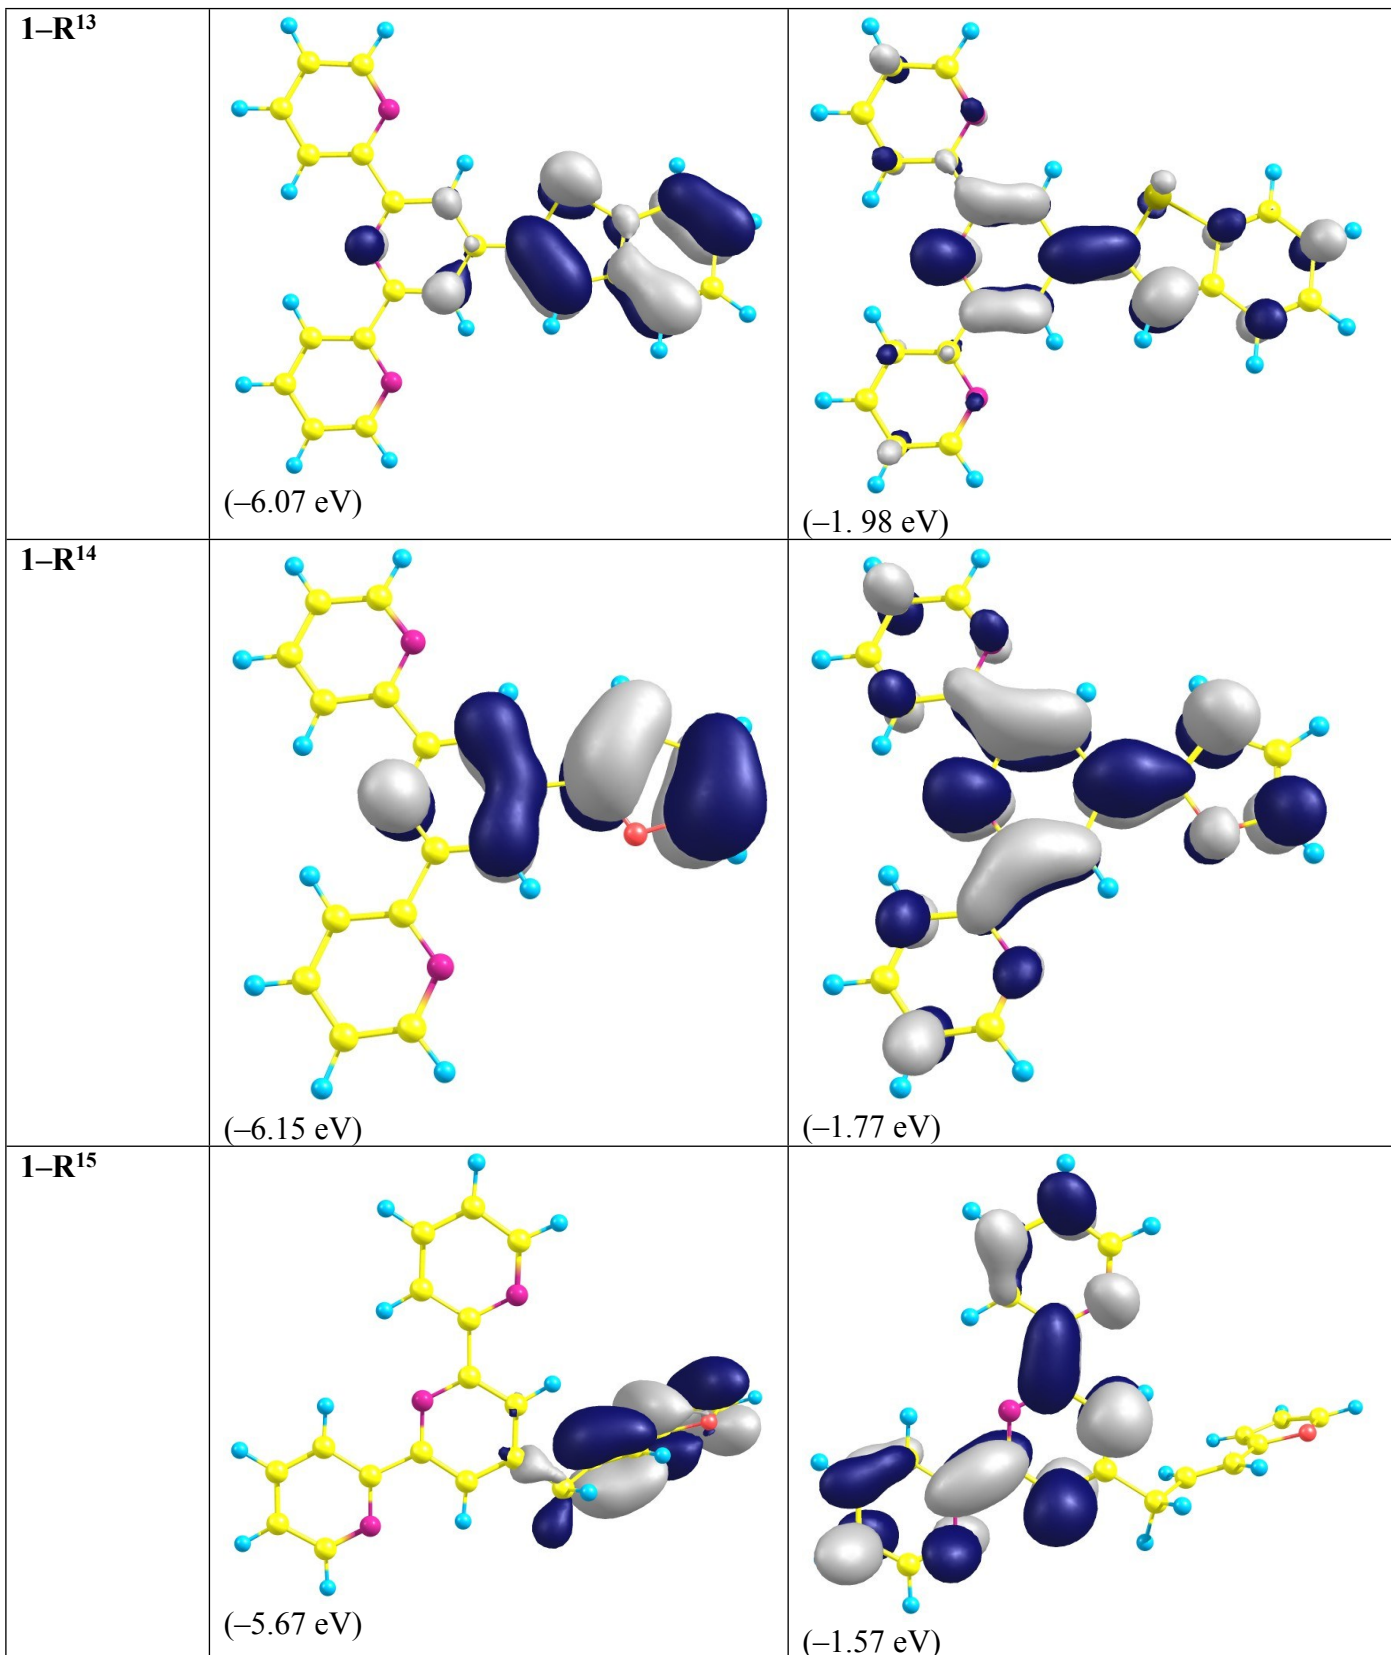

1-R<sup>16</sup>

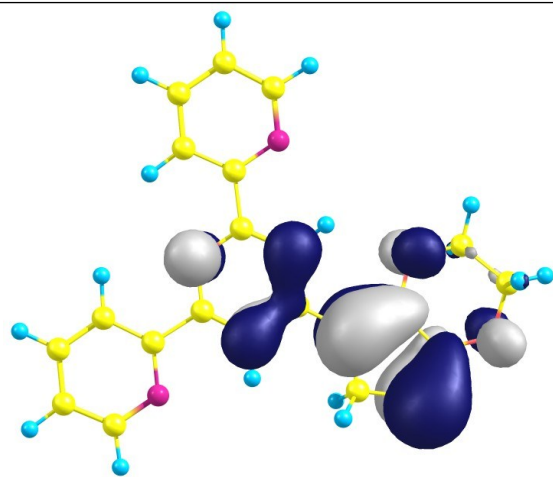

(-5.53 eV)

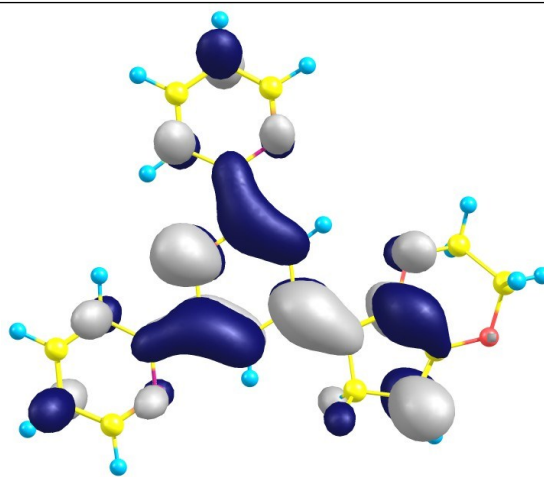

(-1.69 eV)

**Figure S10.** Partial density of states diagrams for **1-R<sup>1-16</sup>**

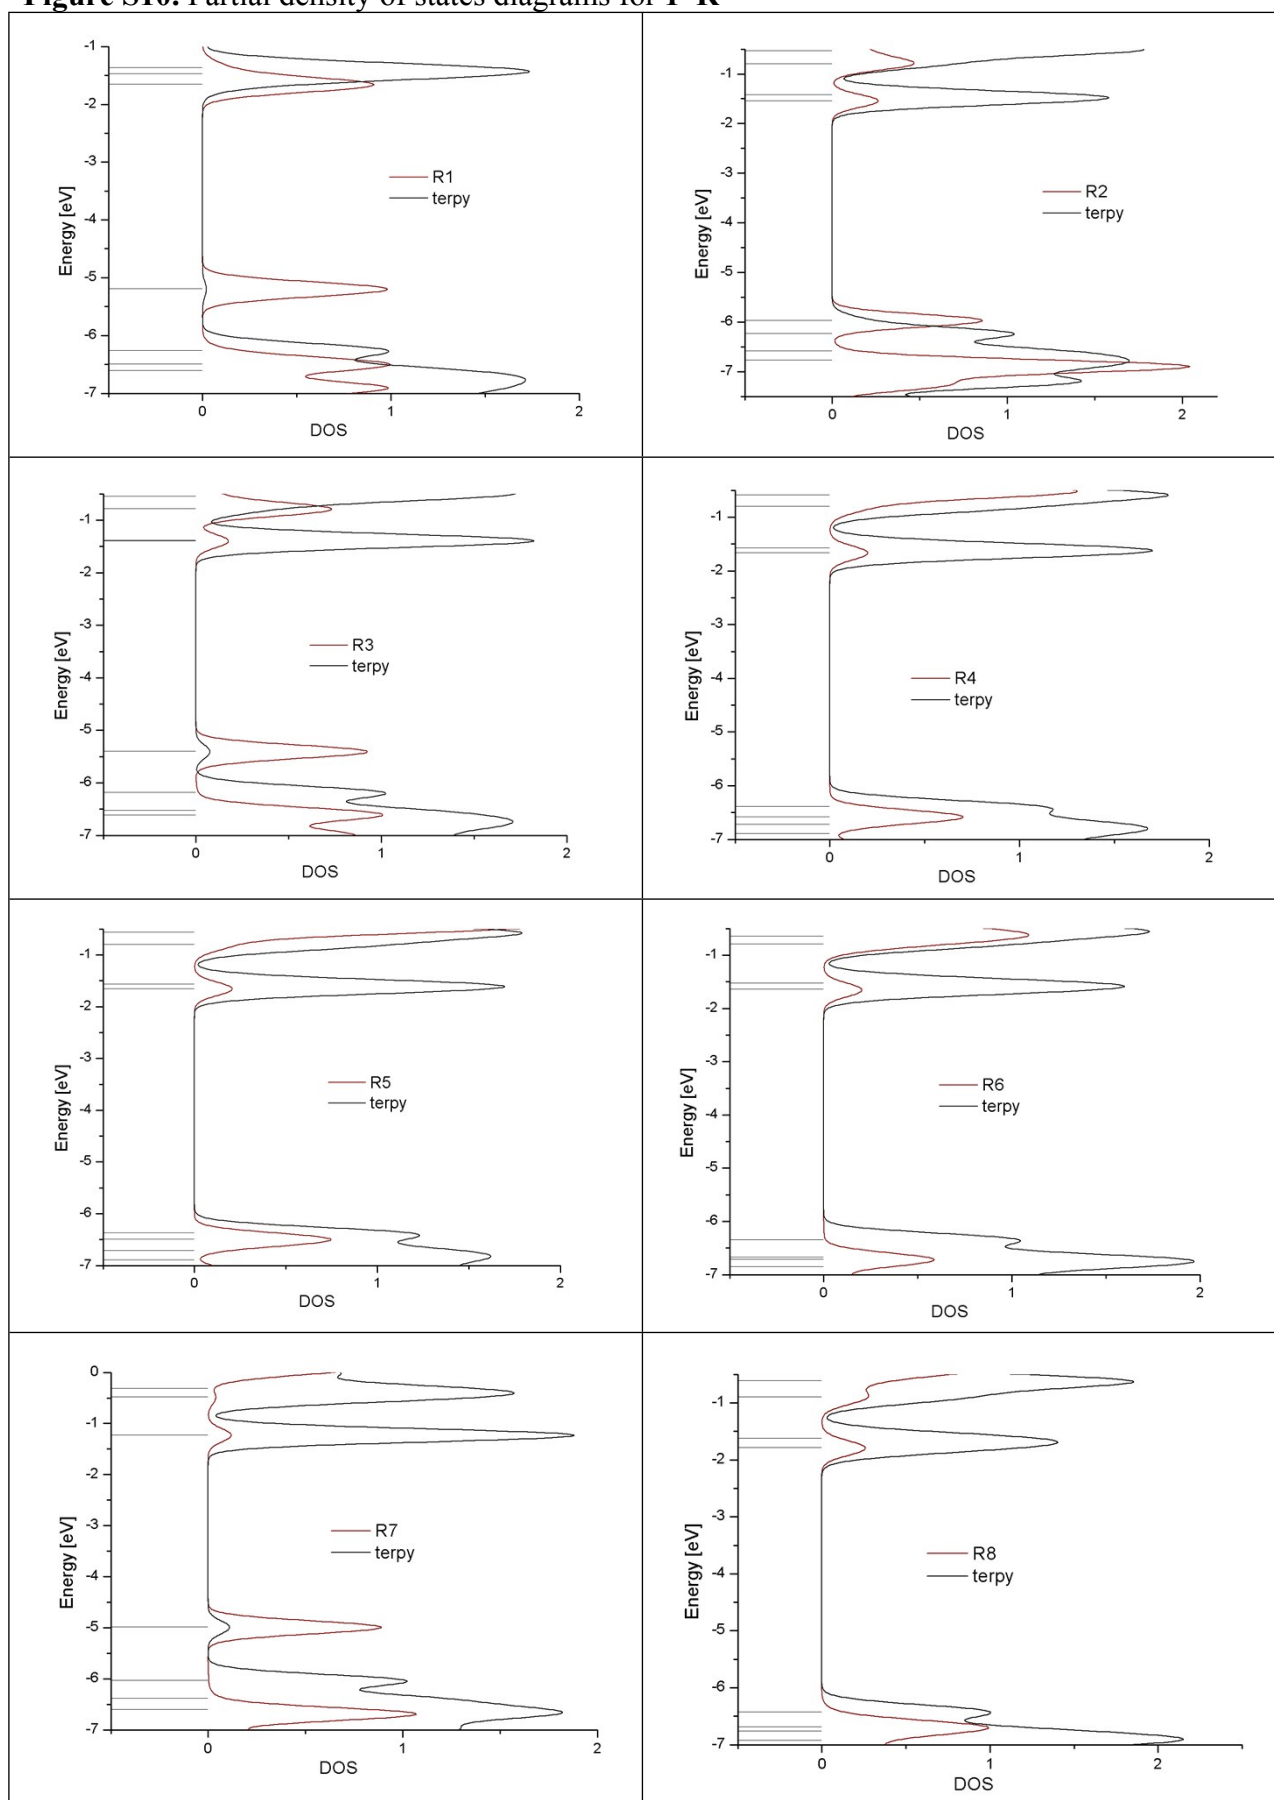

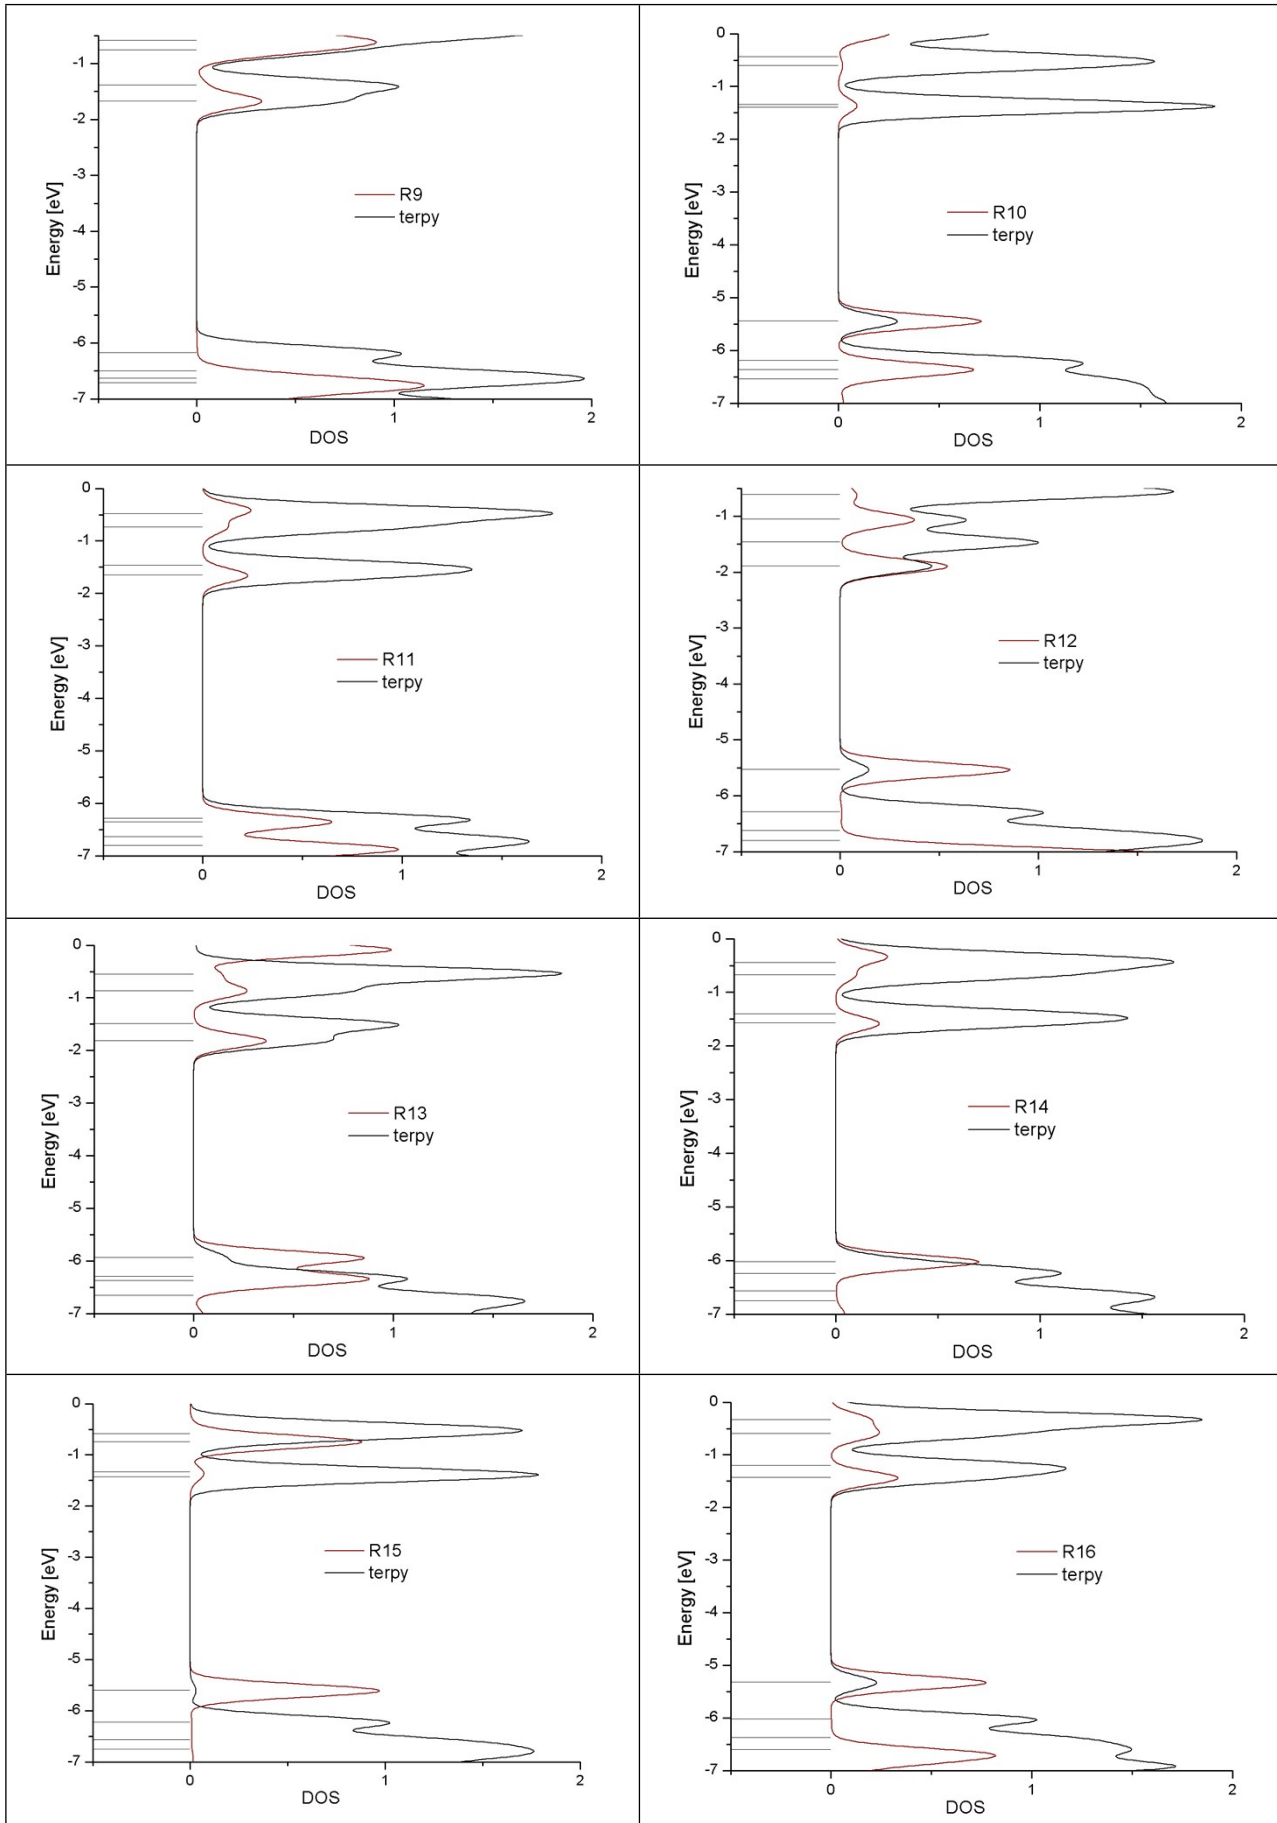

**Figure S11.** Electronic absorption spectra of compounds **1-R<sup>3-6</sup>**, **1-R<sup>8-9</sup>**, **1-R<sup>11</sup>**, **1-R<sup>13-14</sup>**.

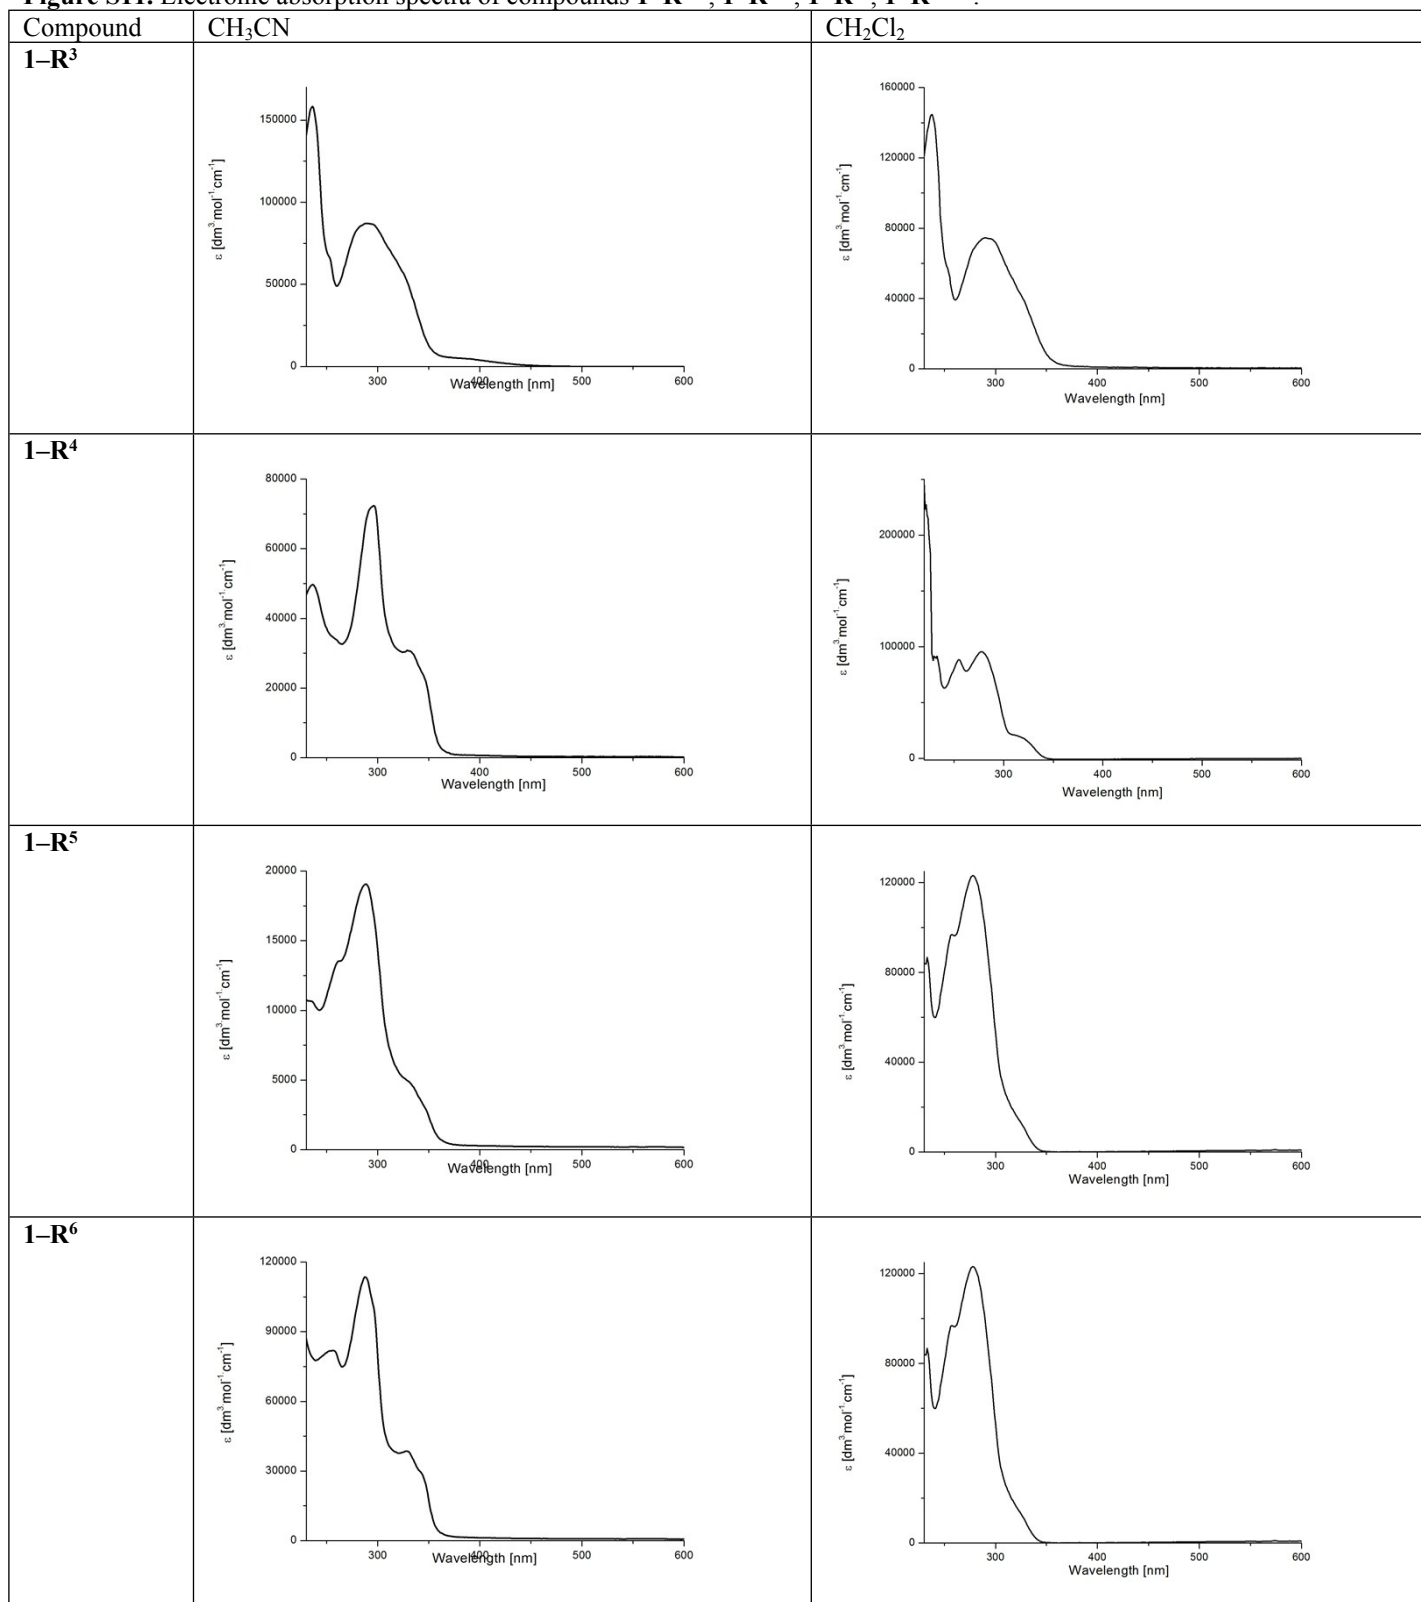

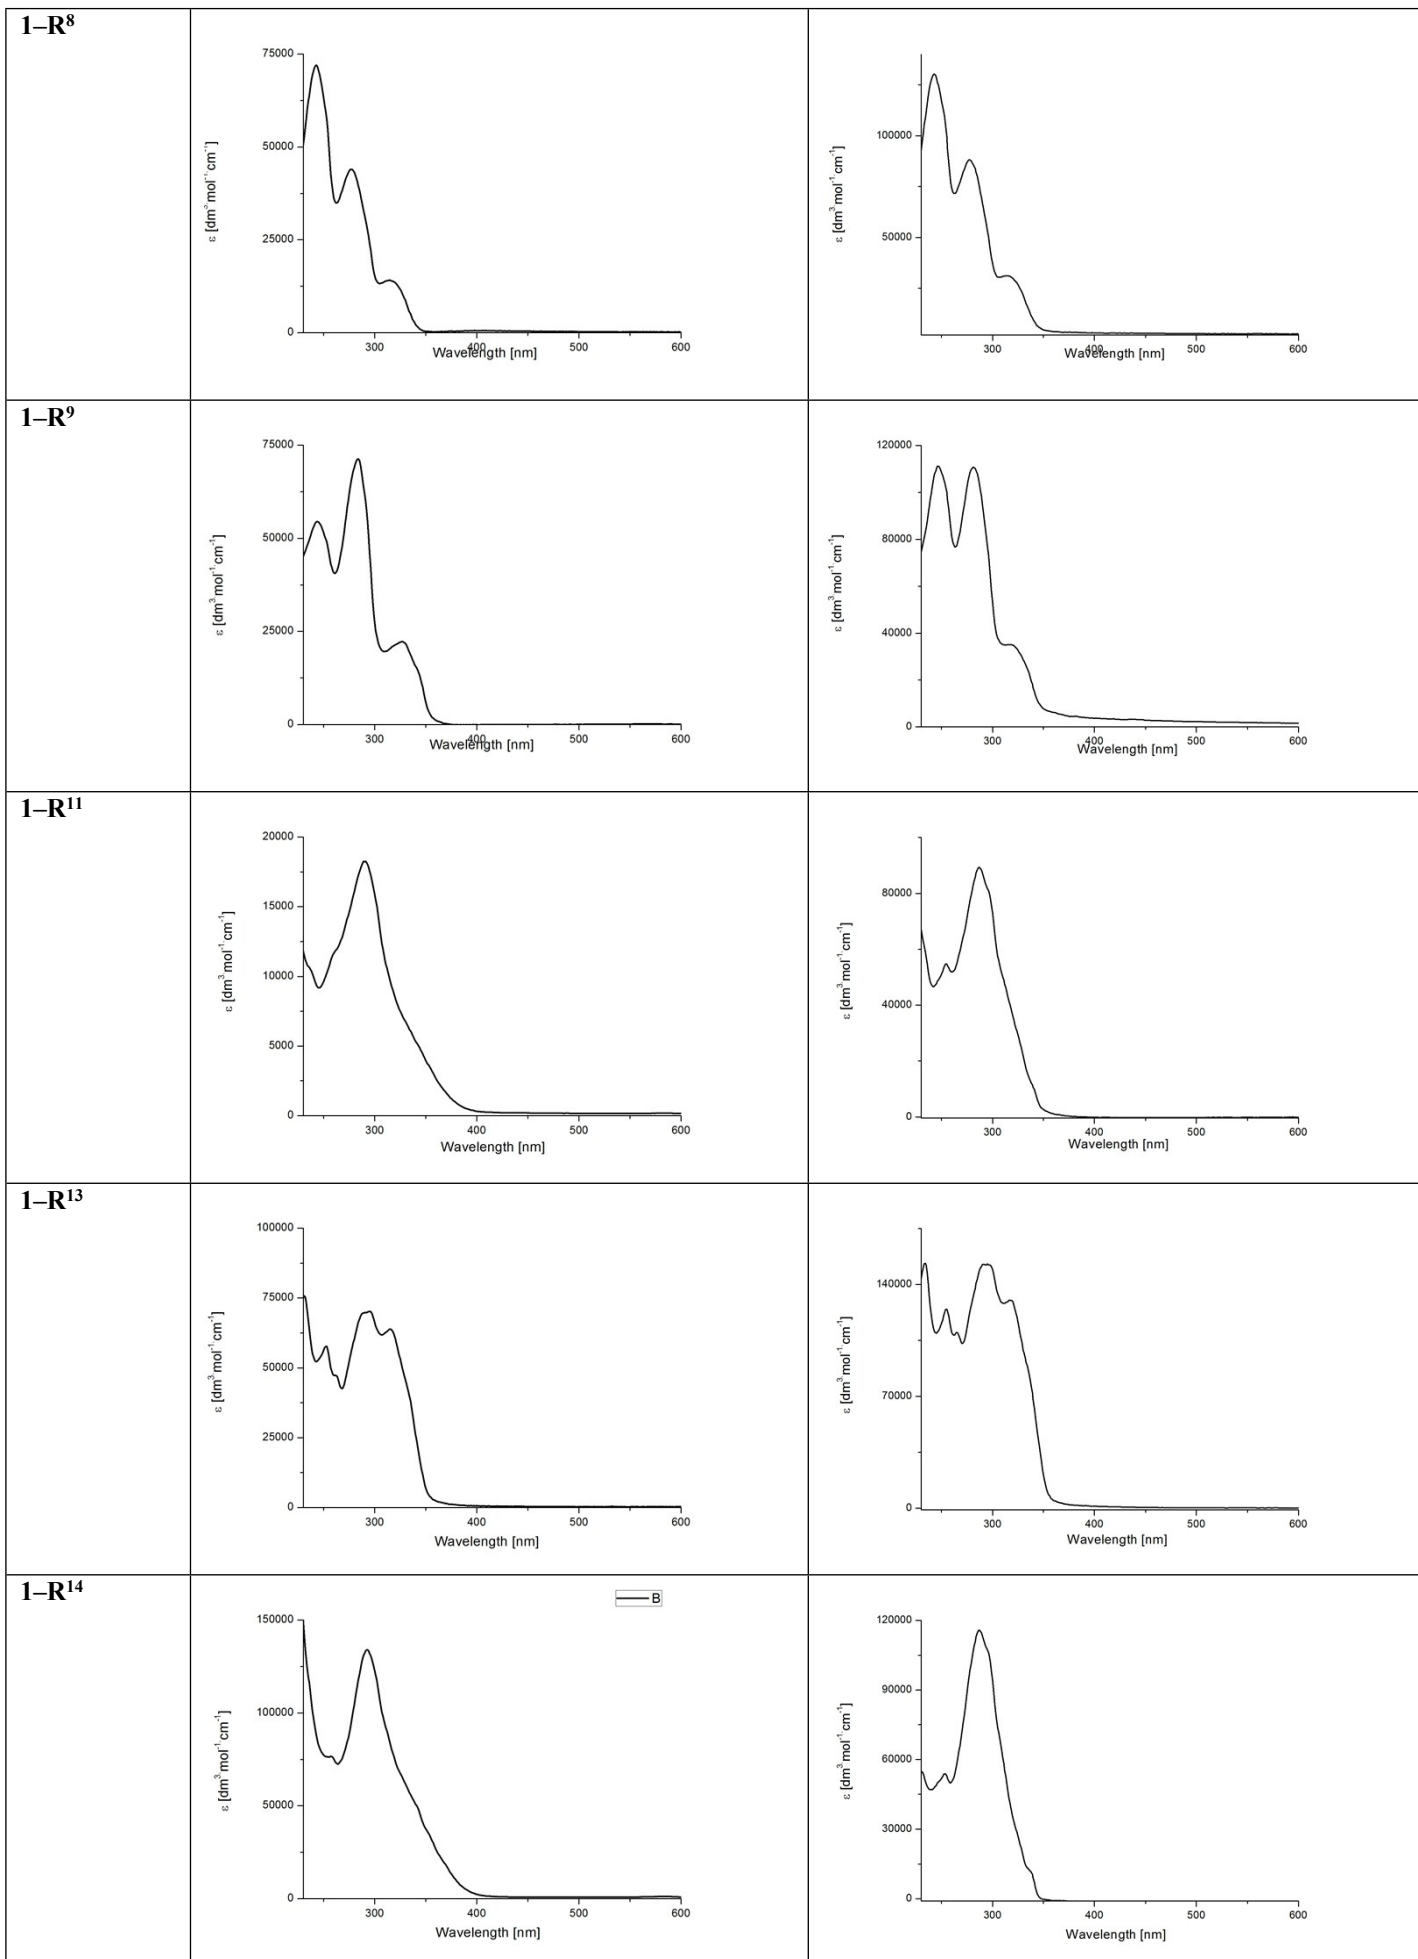

**Figure S12.** Excitation and emission spectra of compounds **1-R<sup>1-16</sup>**.

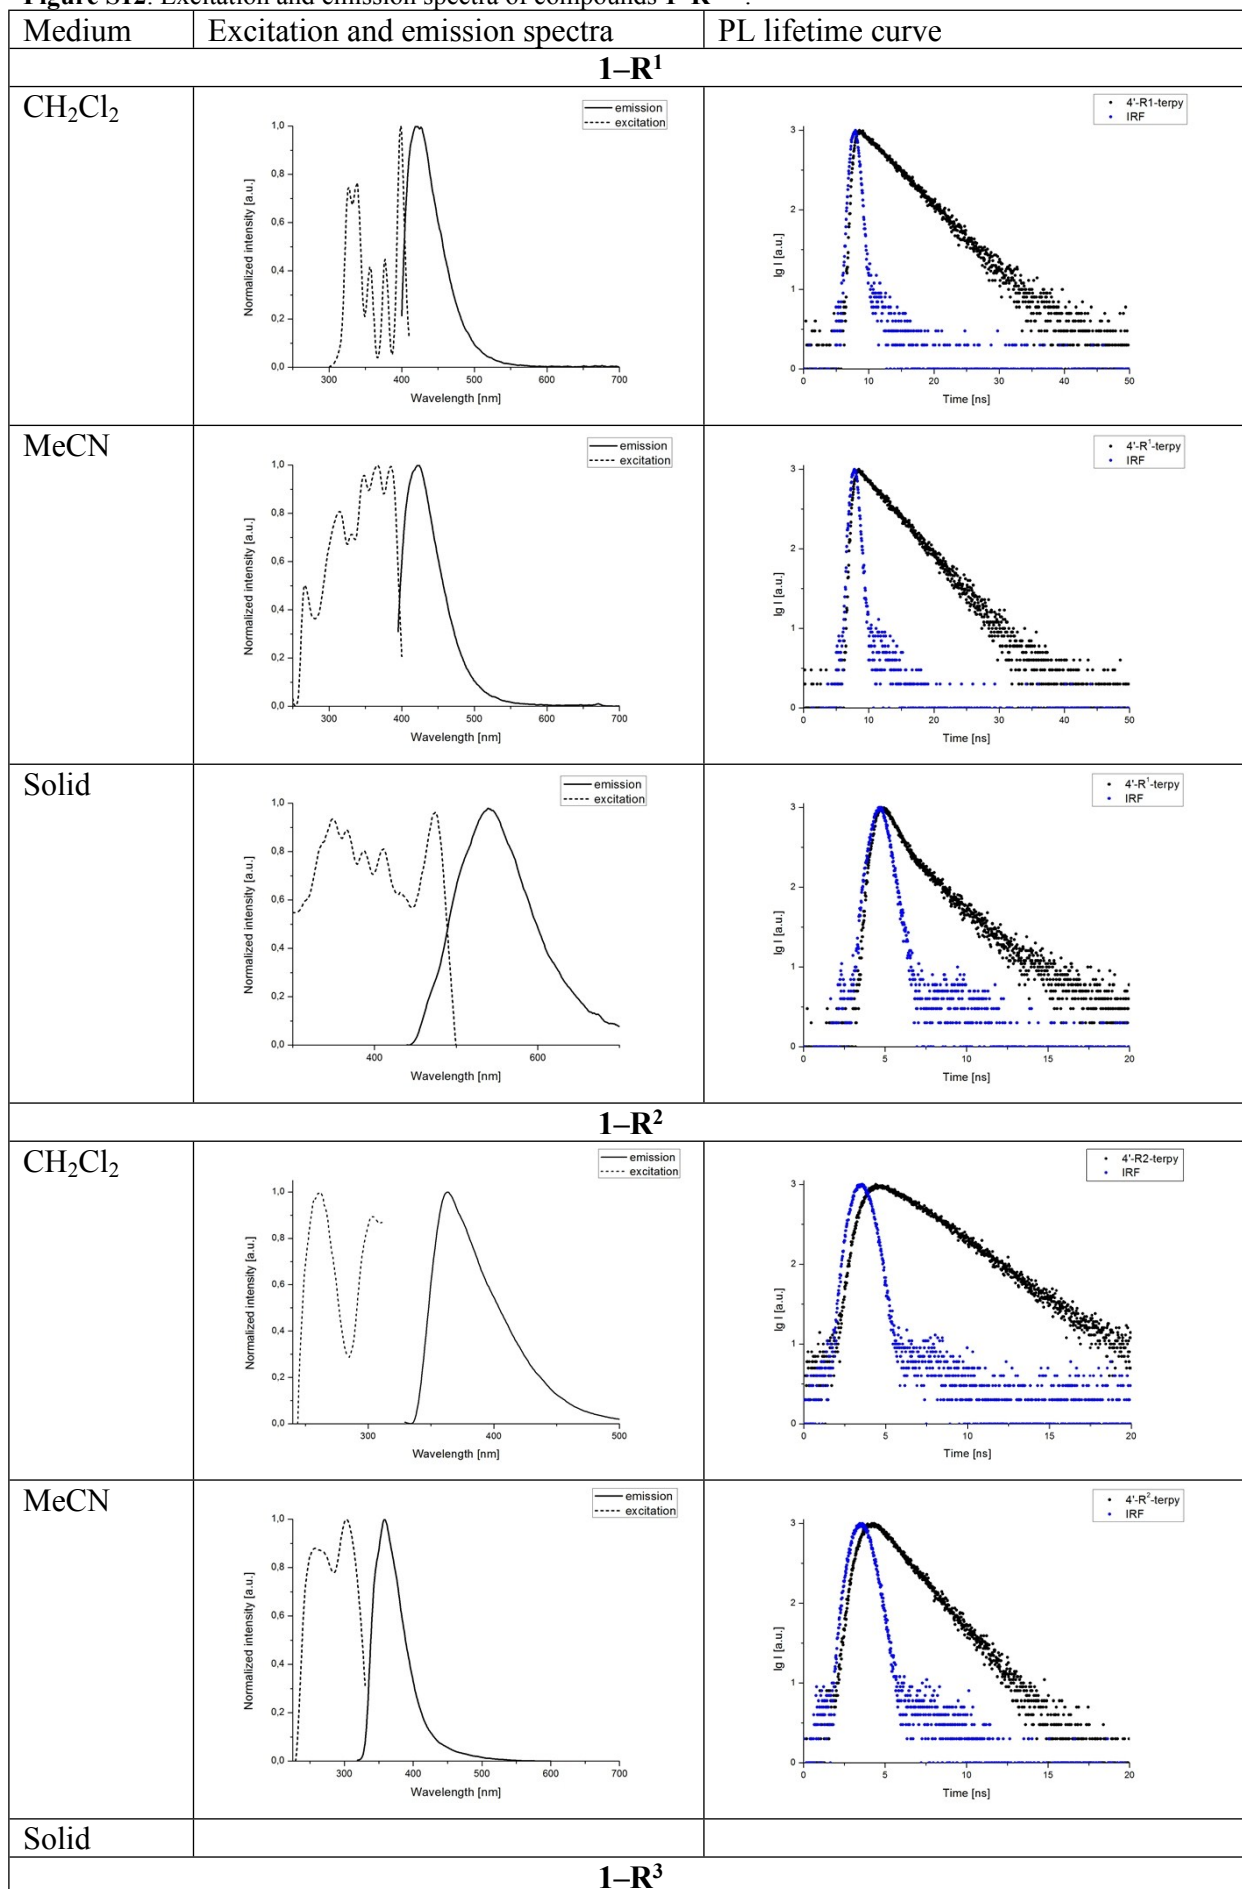



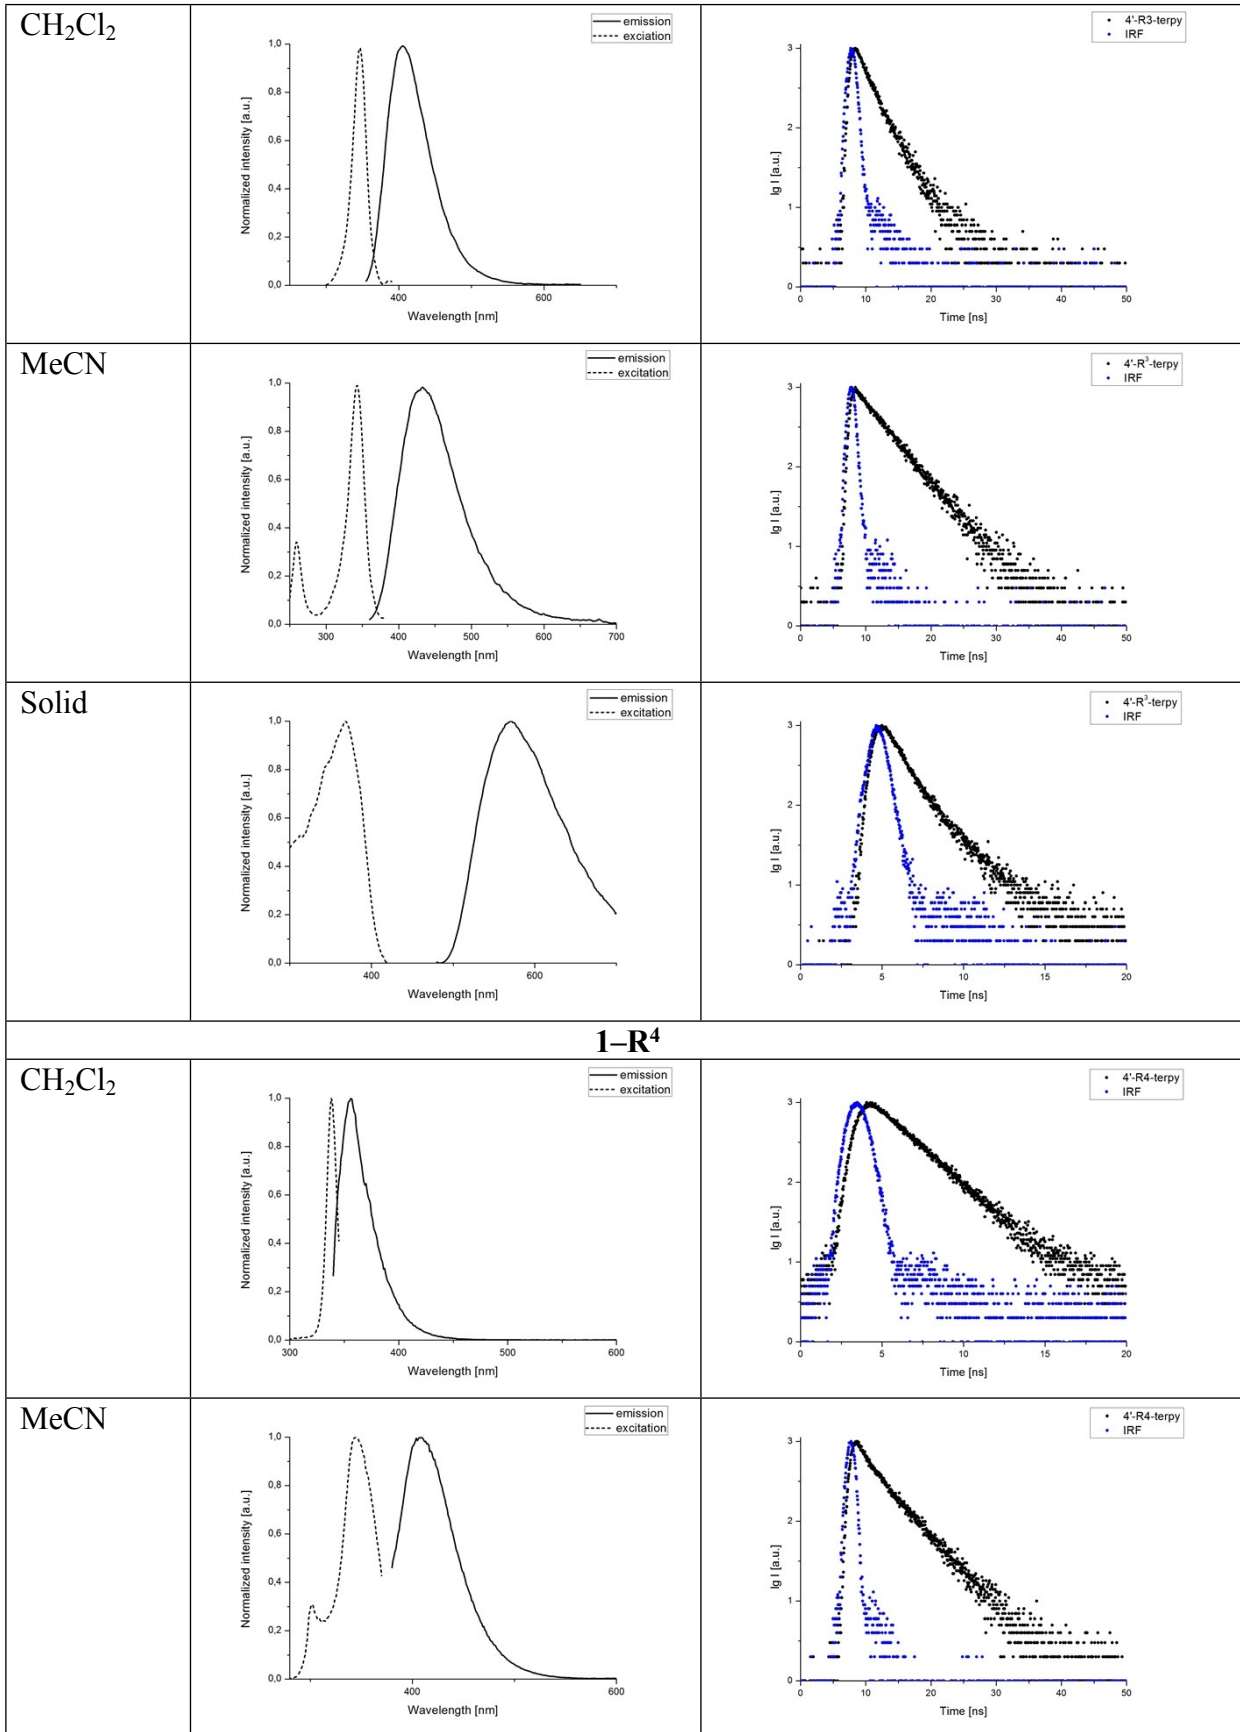

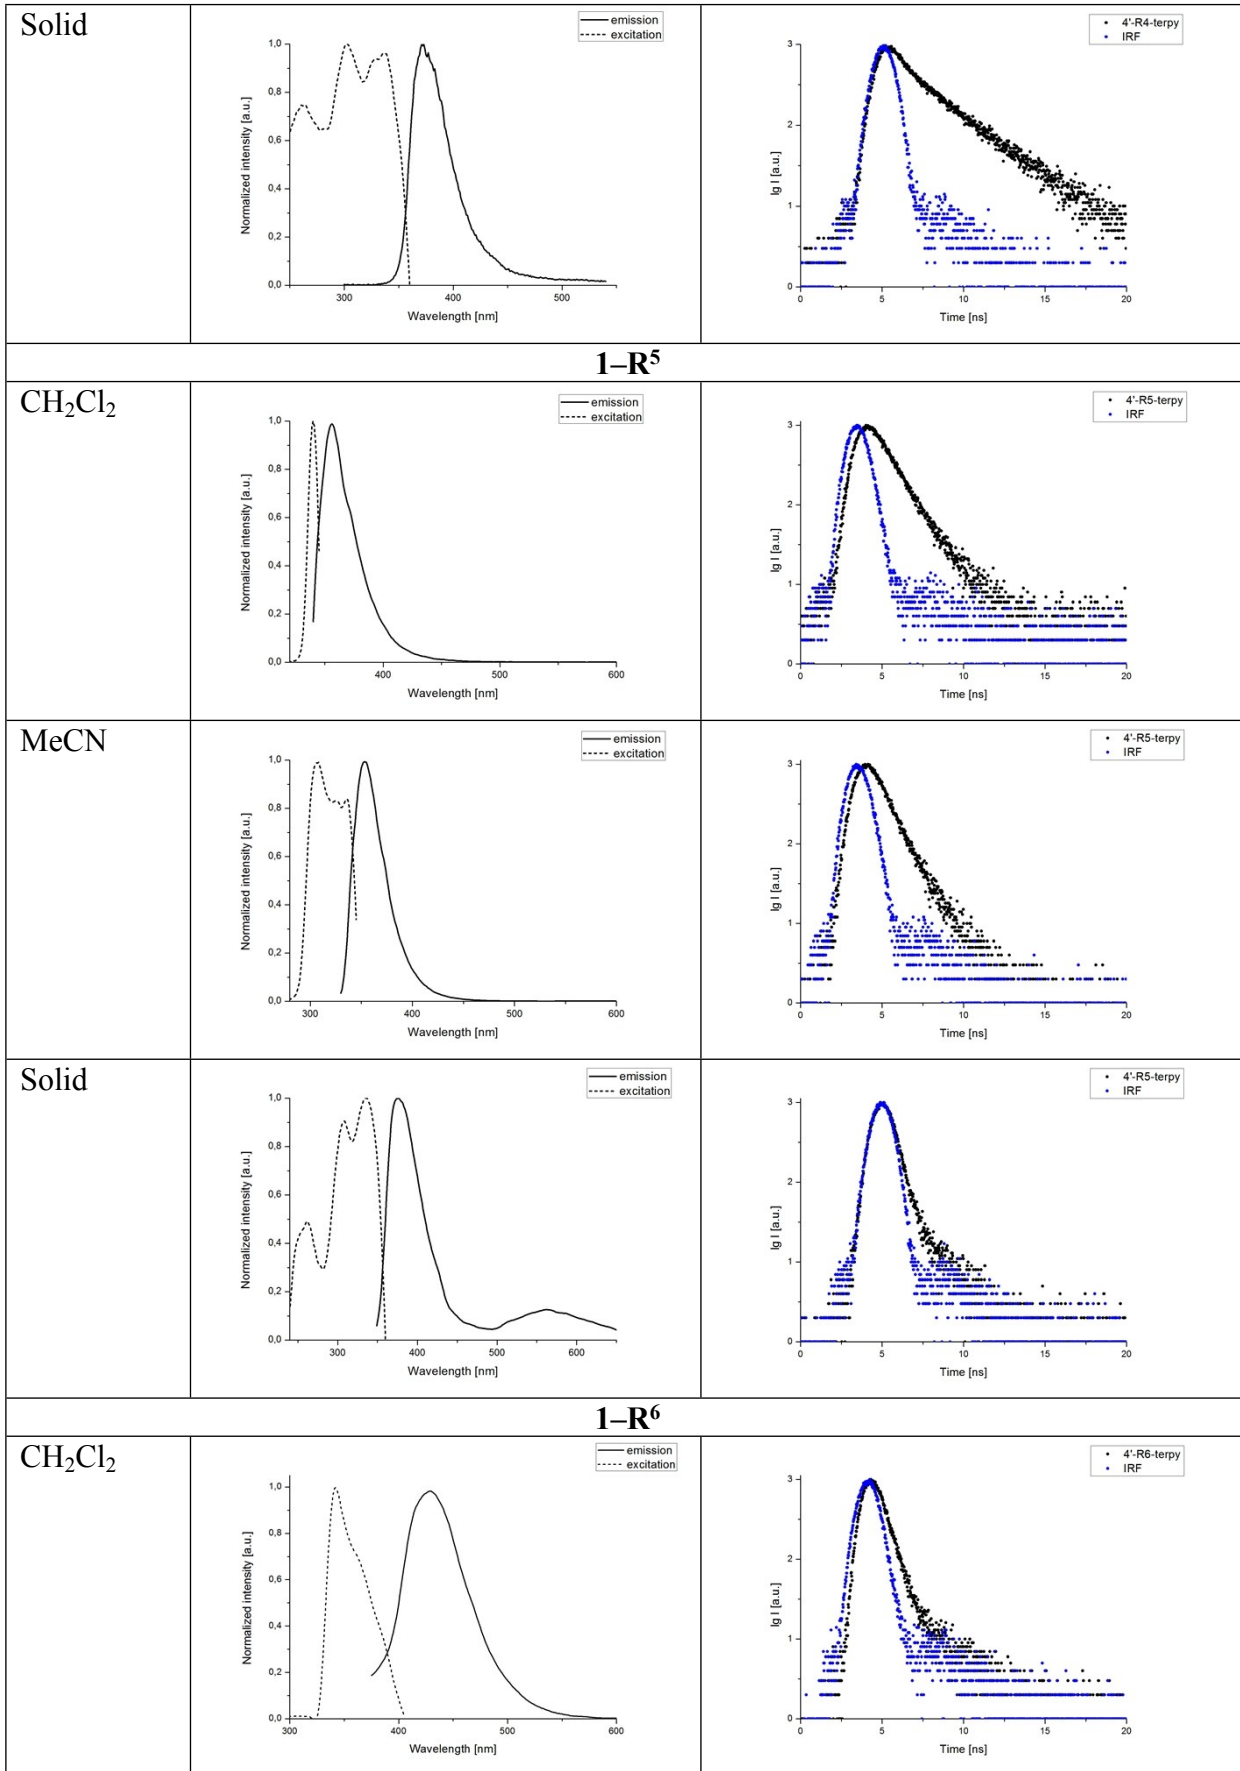

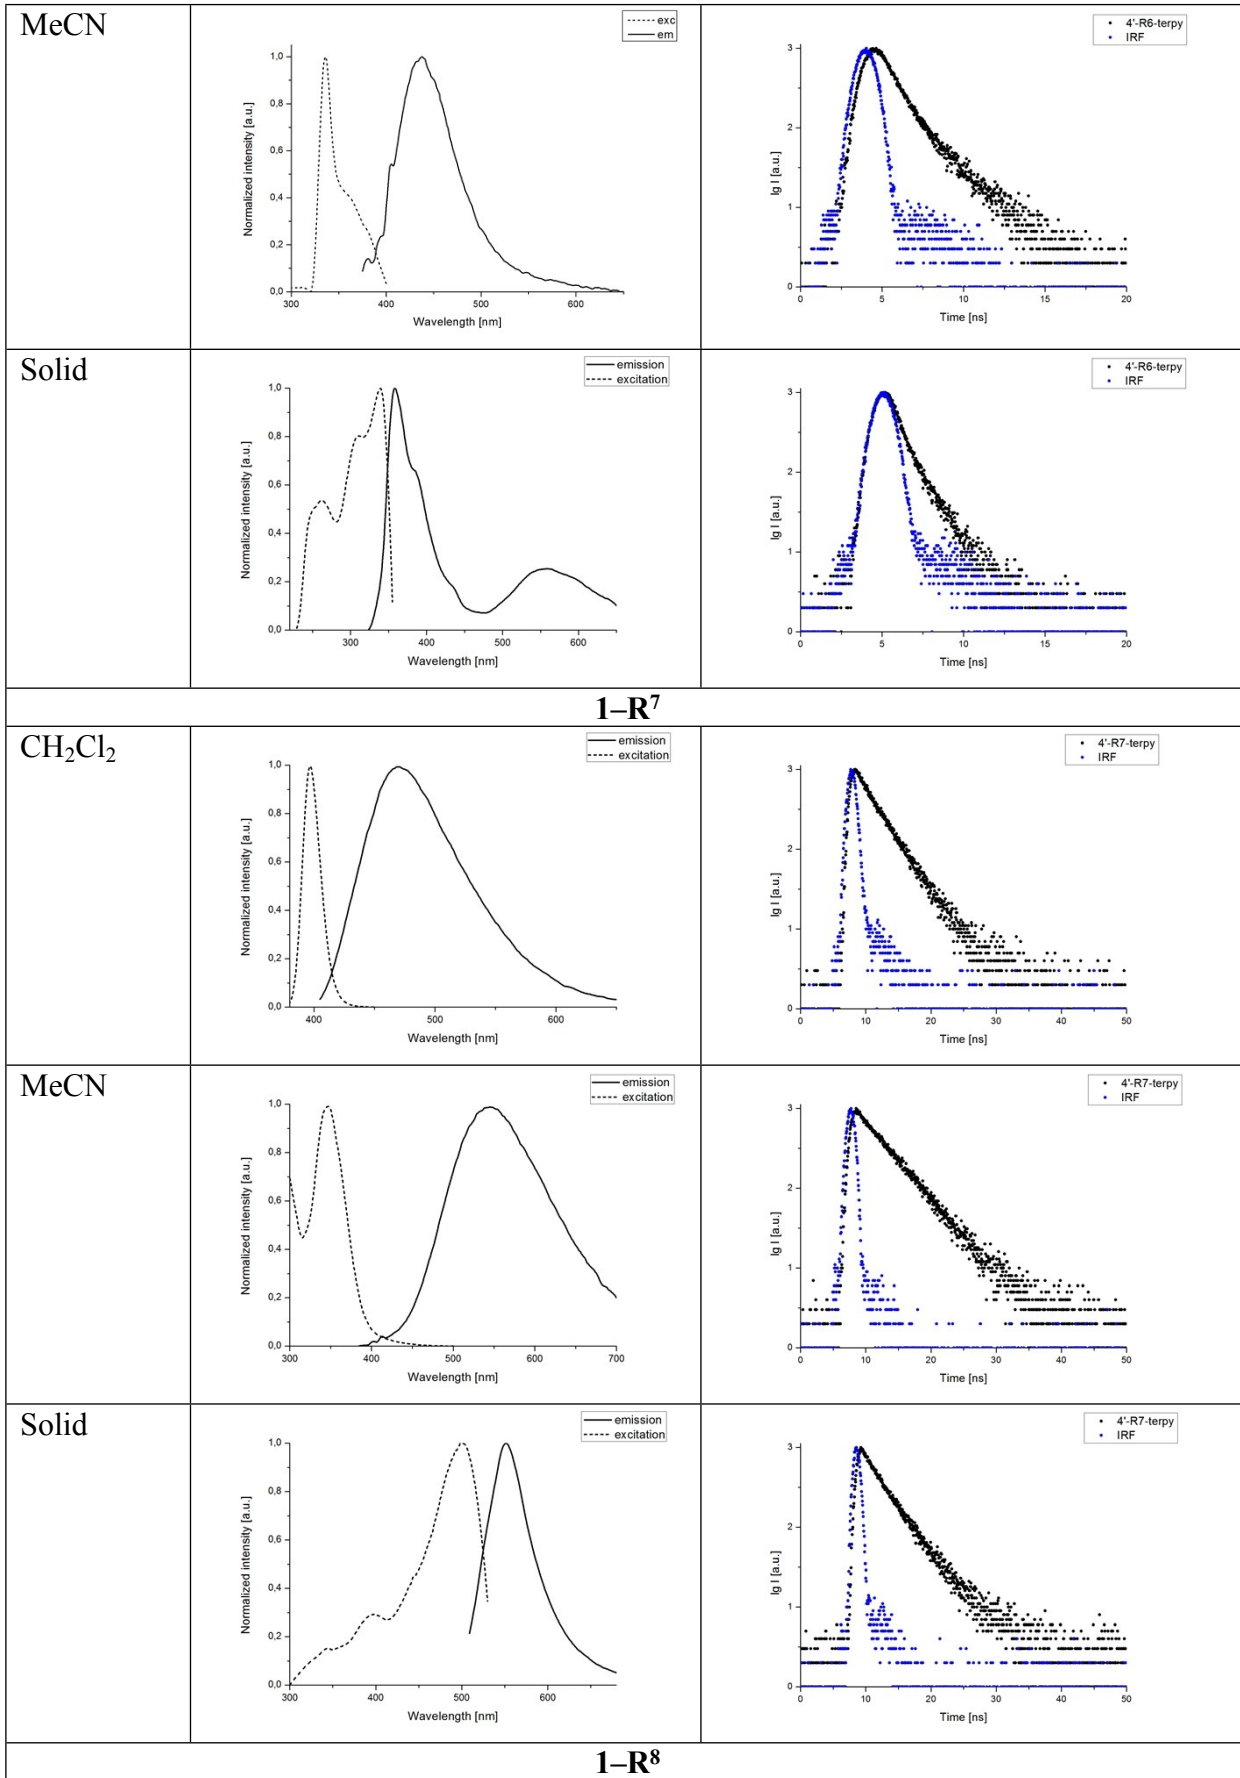

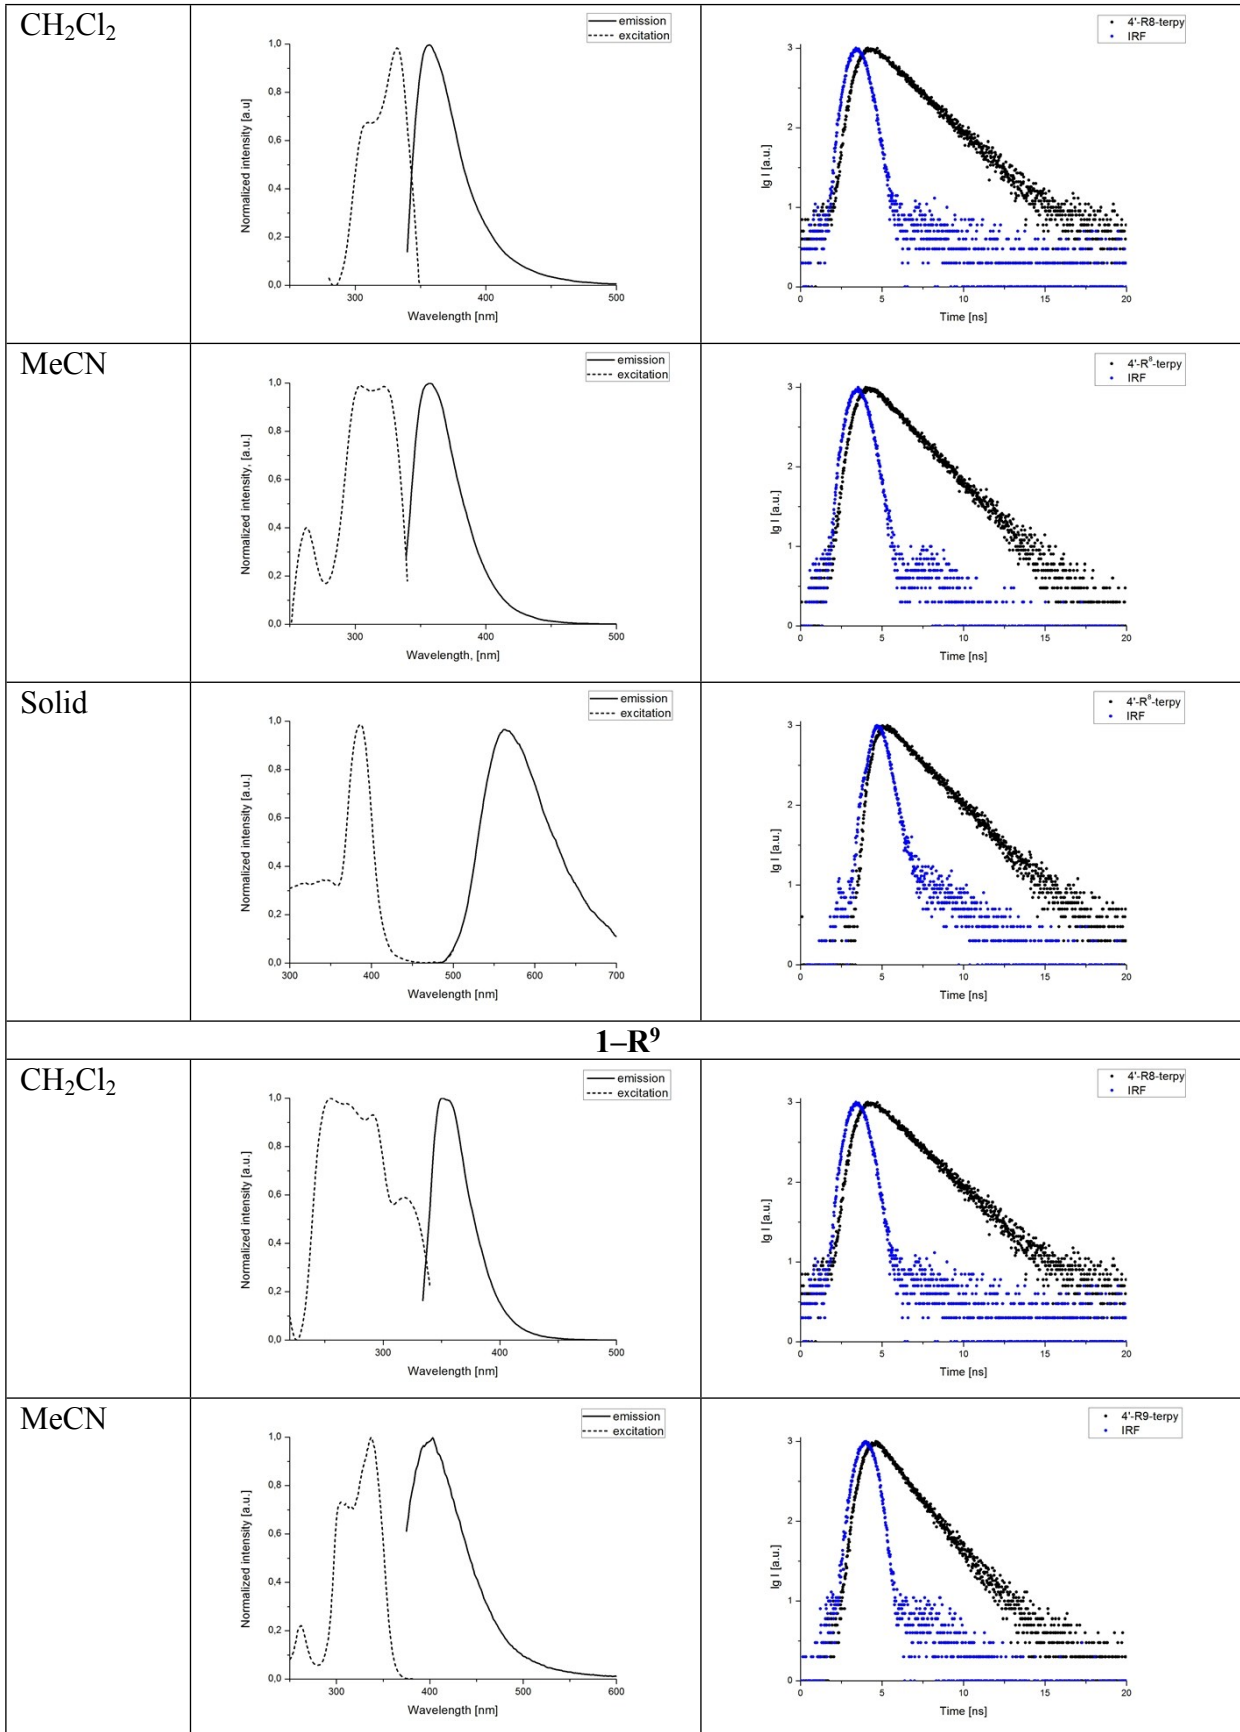

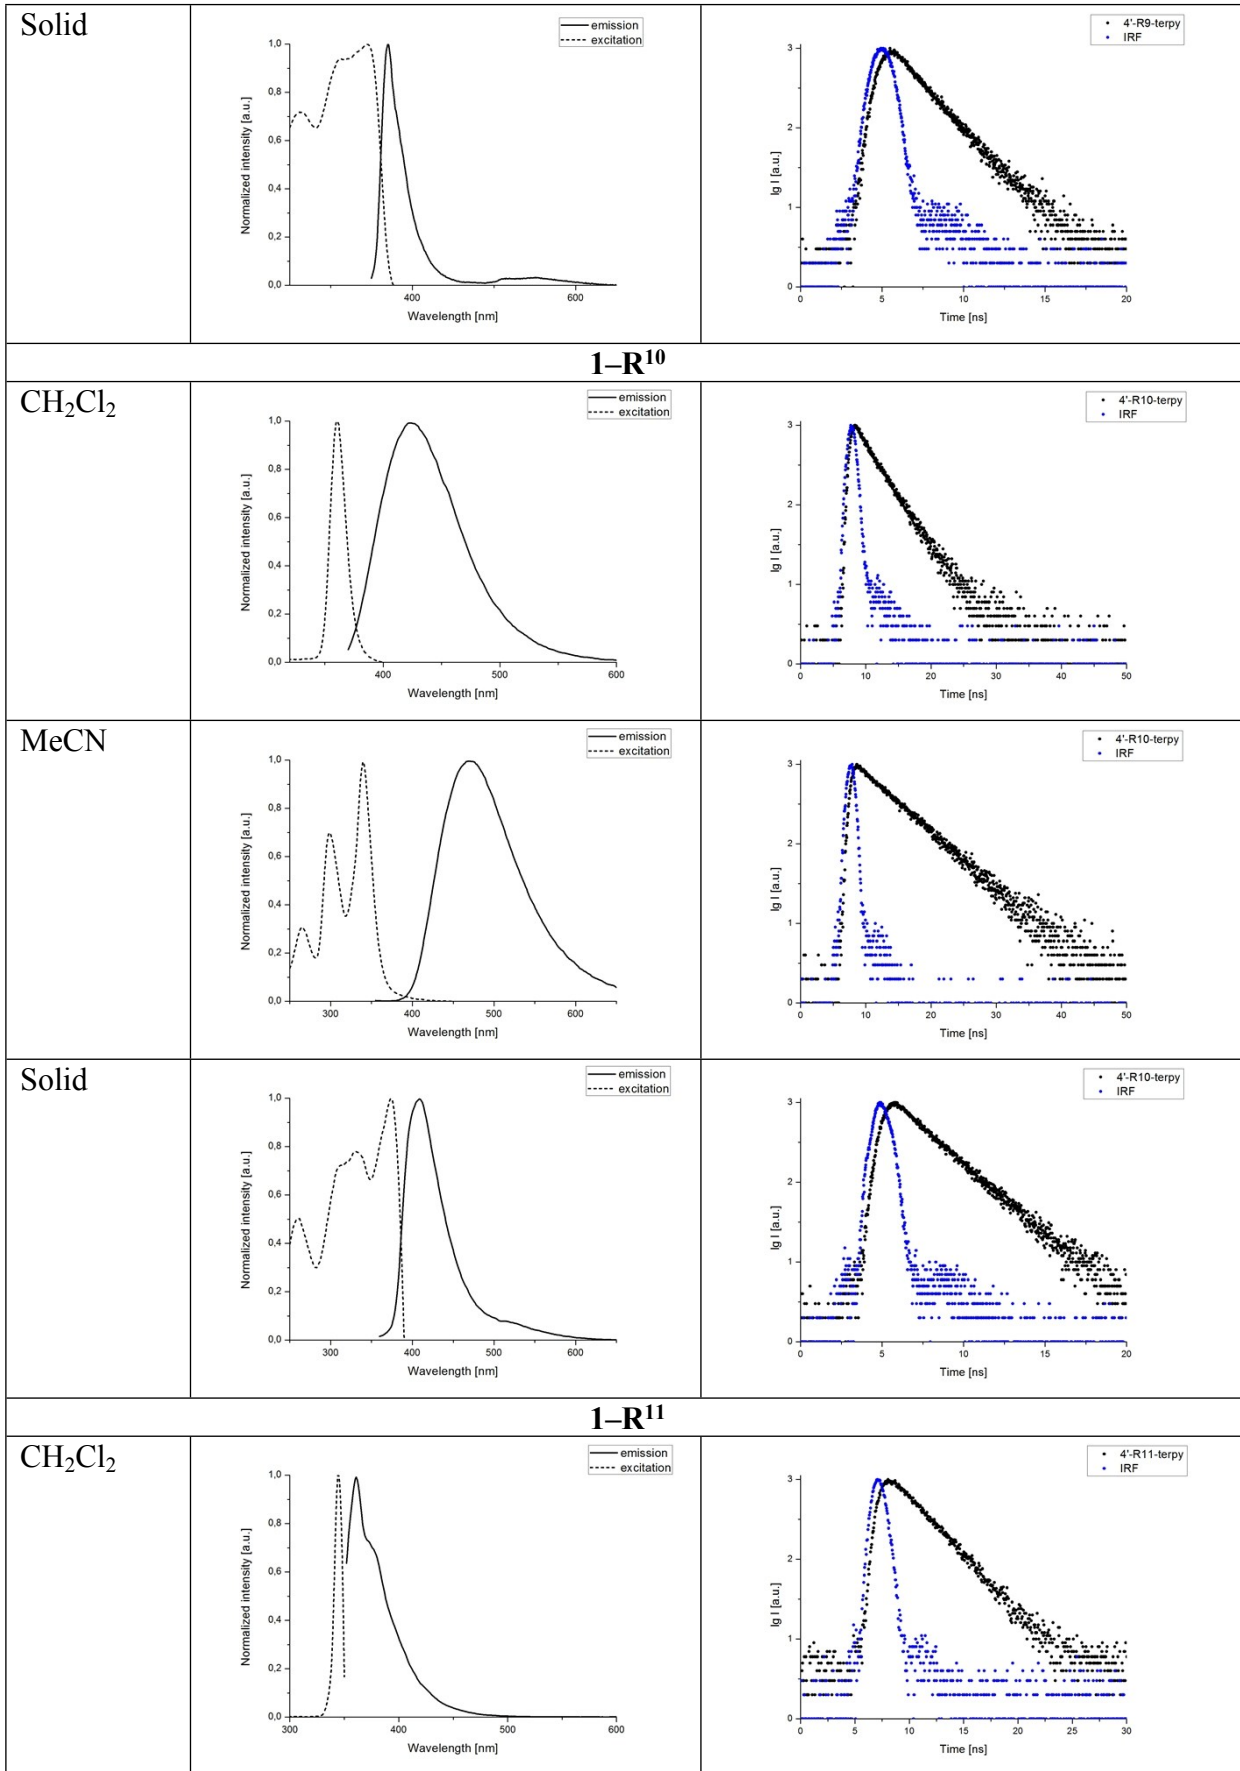

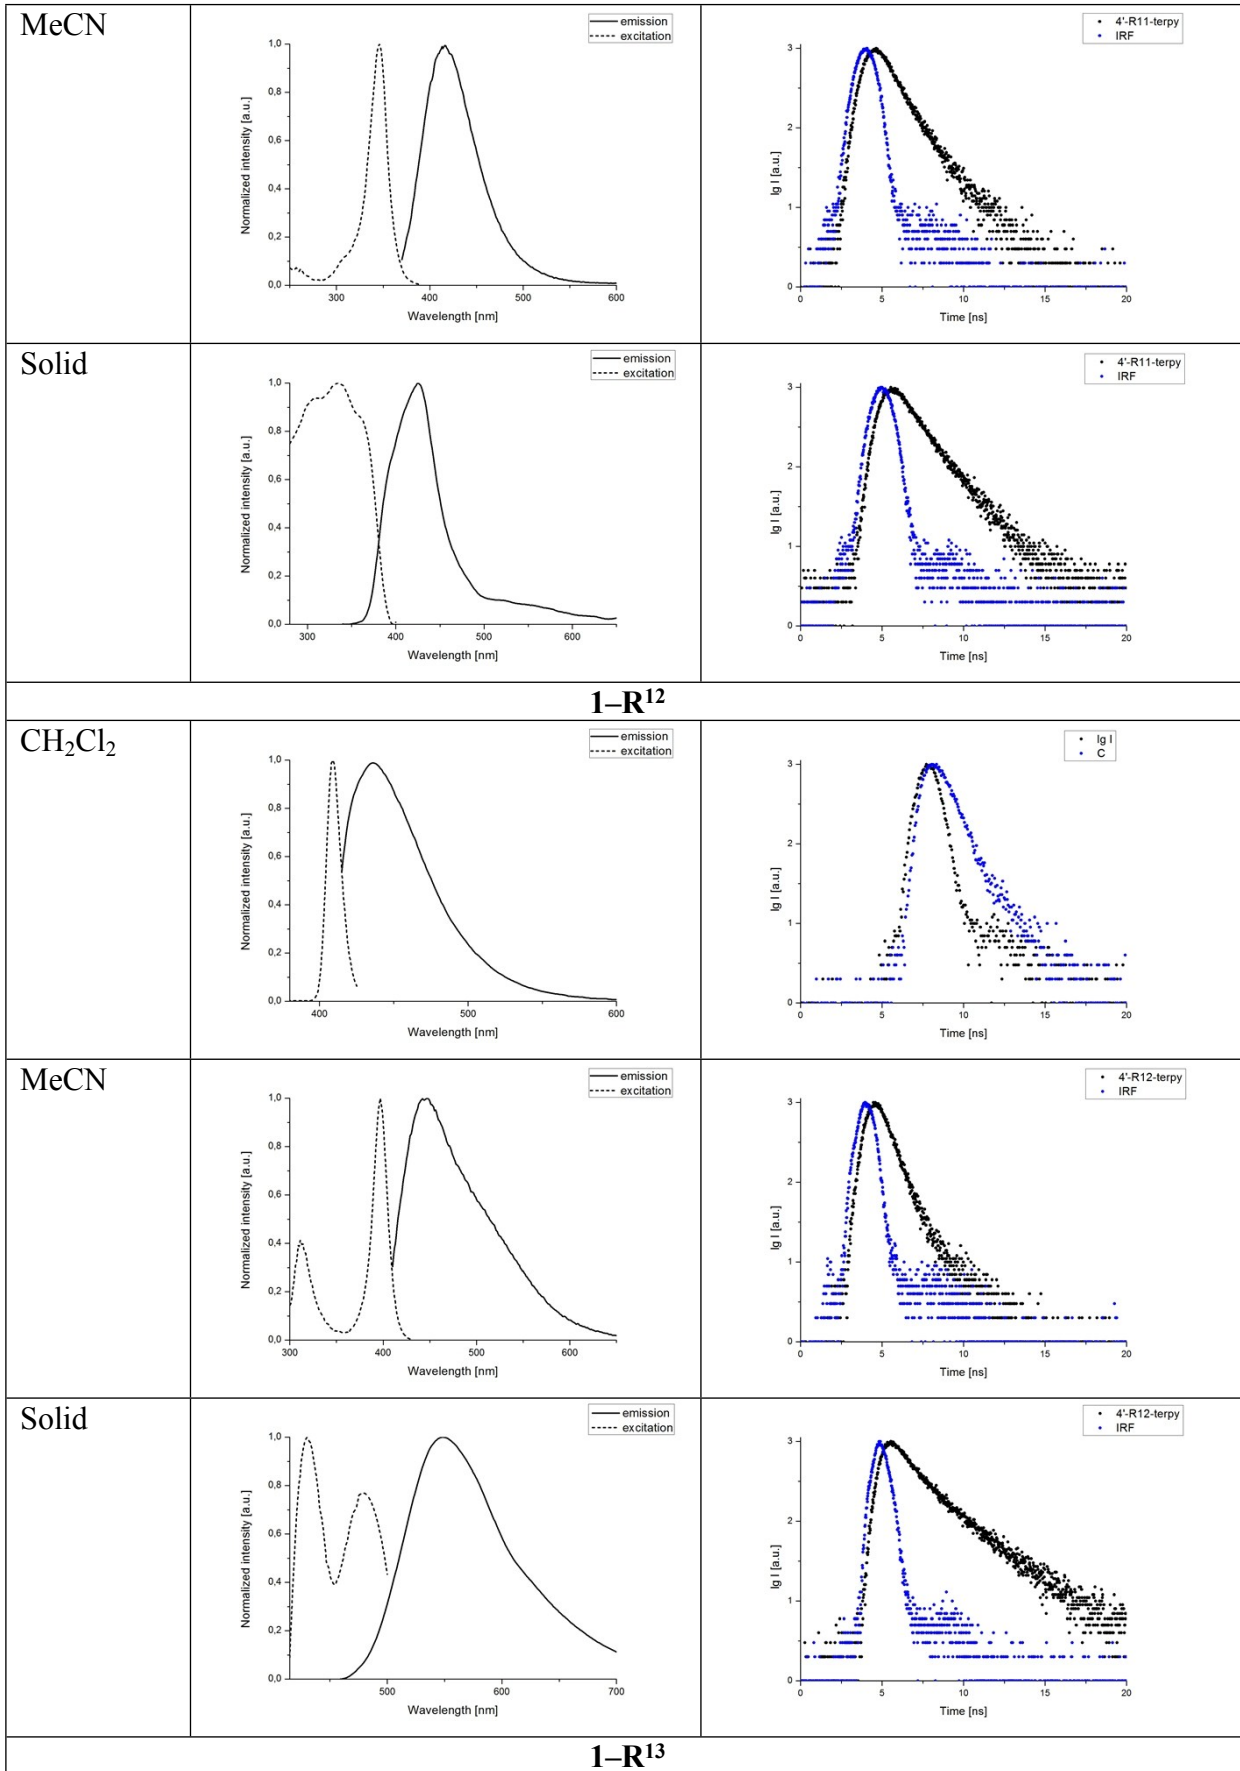

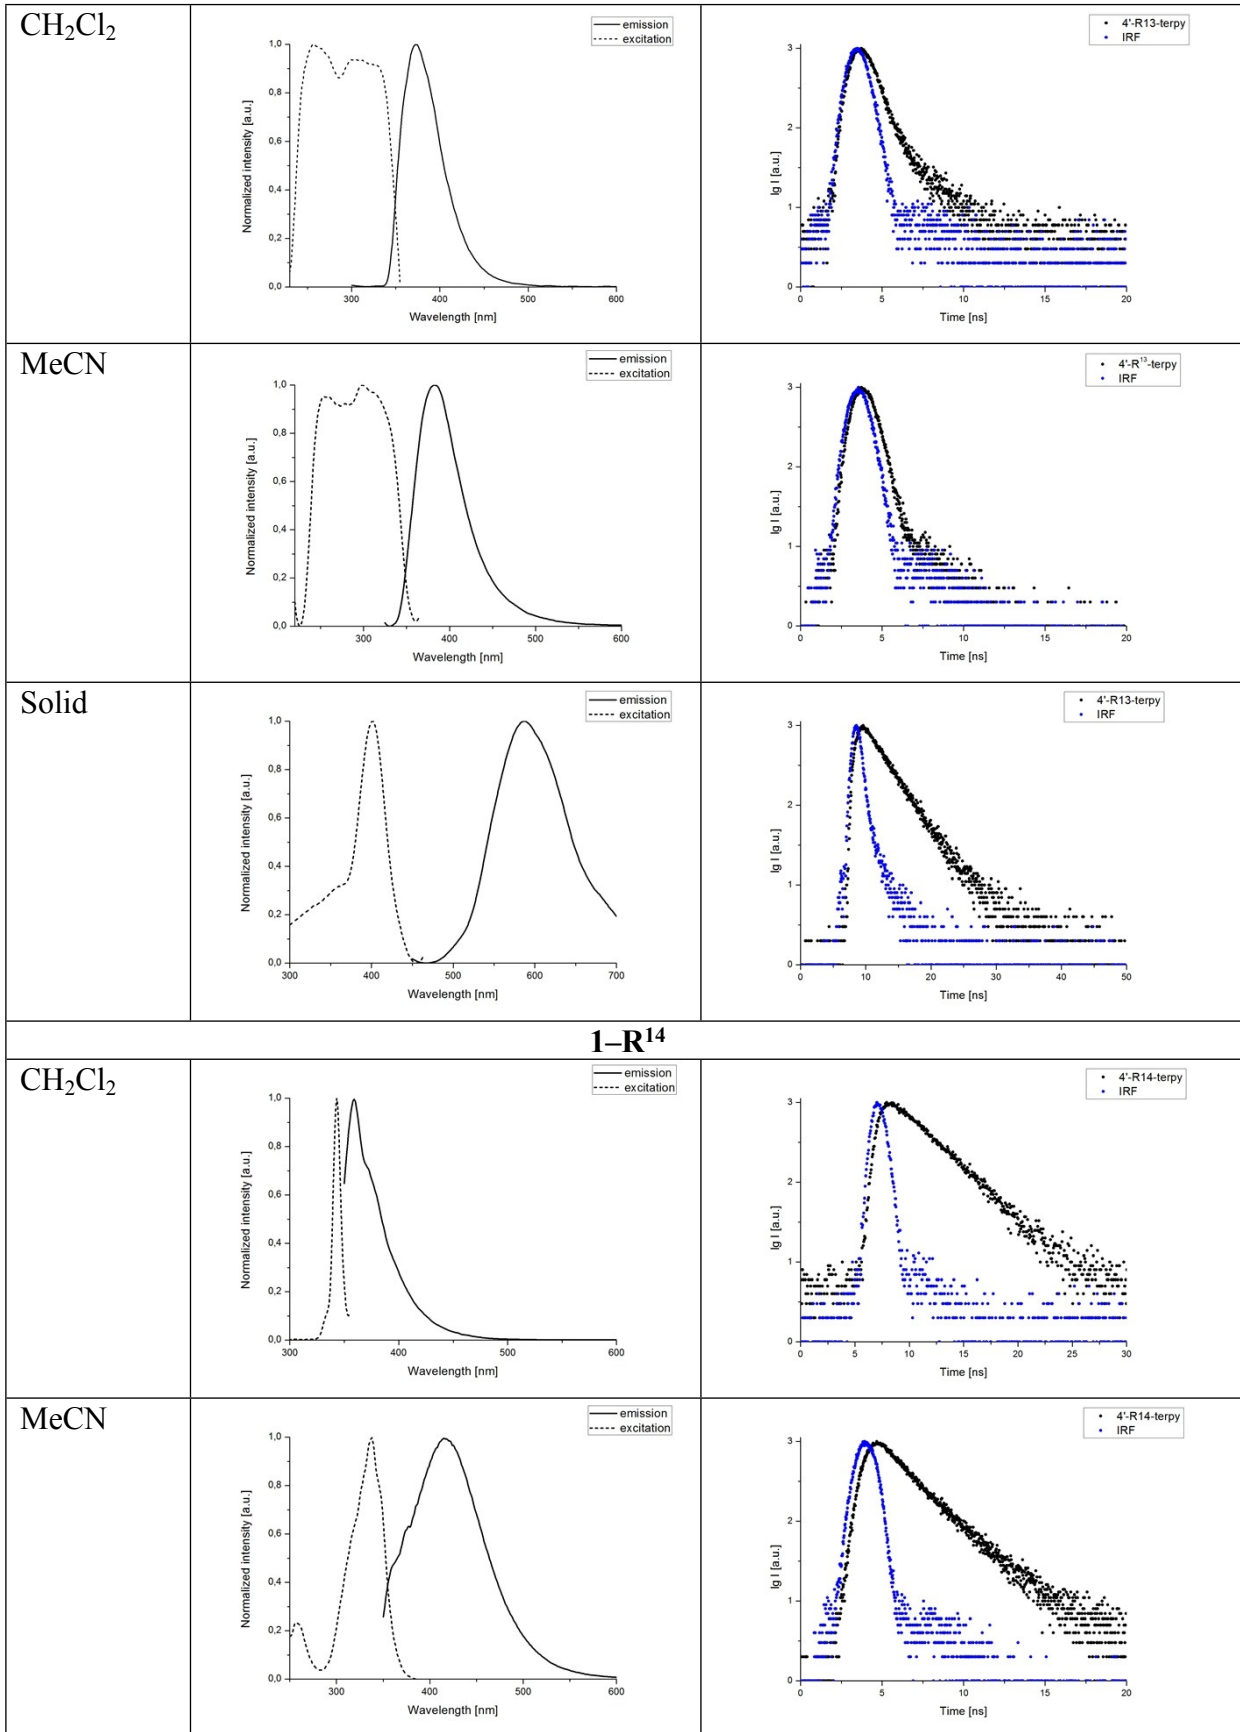

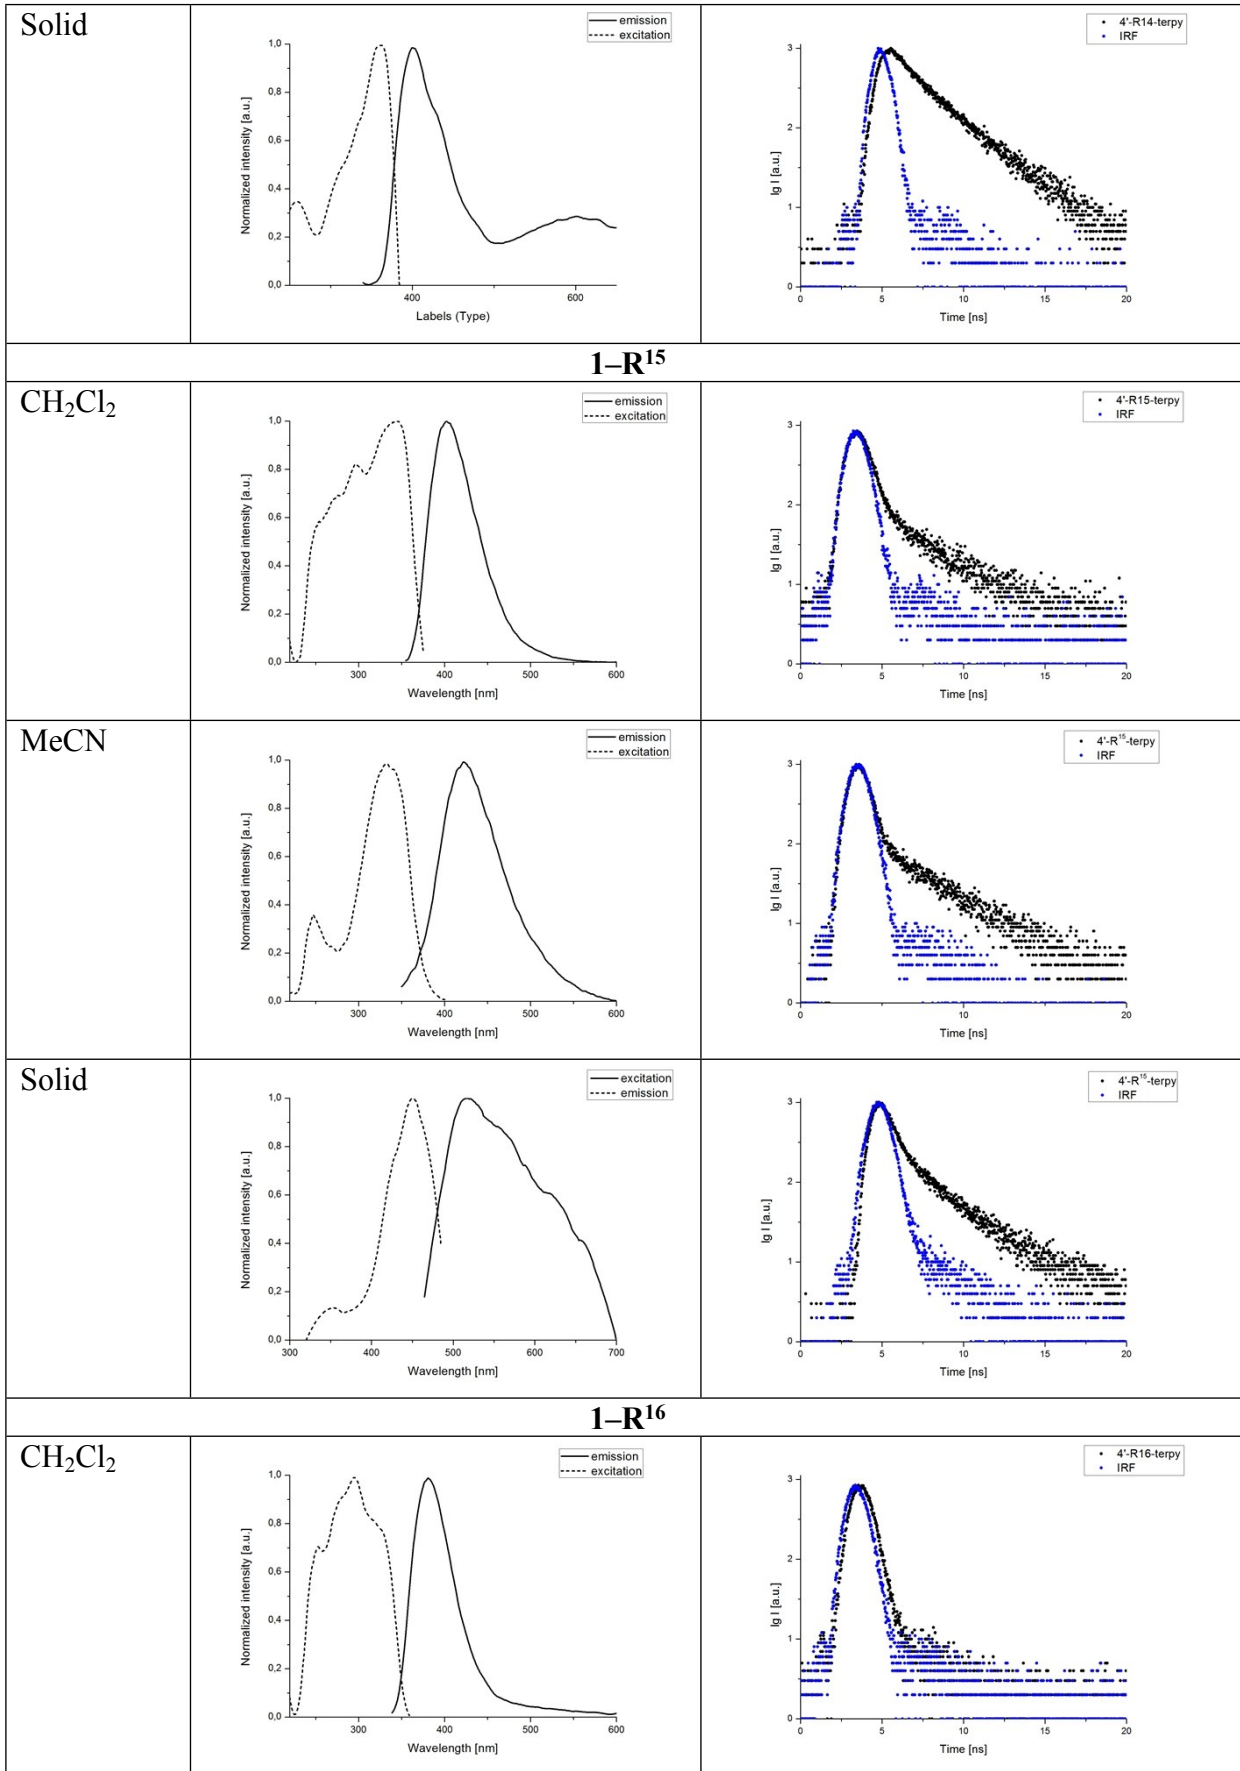



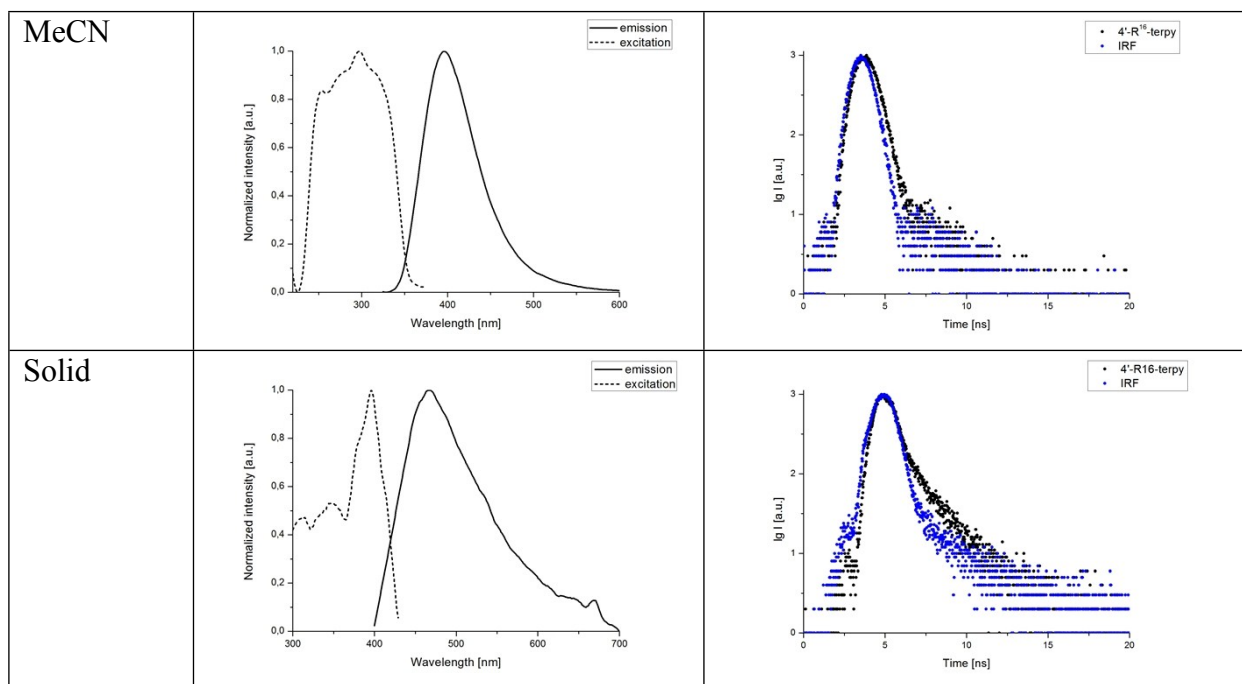

Figure S13. Relative orientation of the experimental (blue) and optimised (red) molecules of **1-R<sup>3</sup>**, **1-R<sup>7</sup>**, **1-R<sup>8</sup>** and **1-R<sup>14</sup>**.

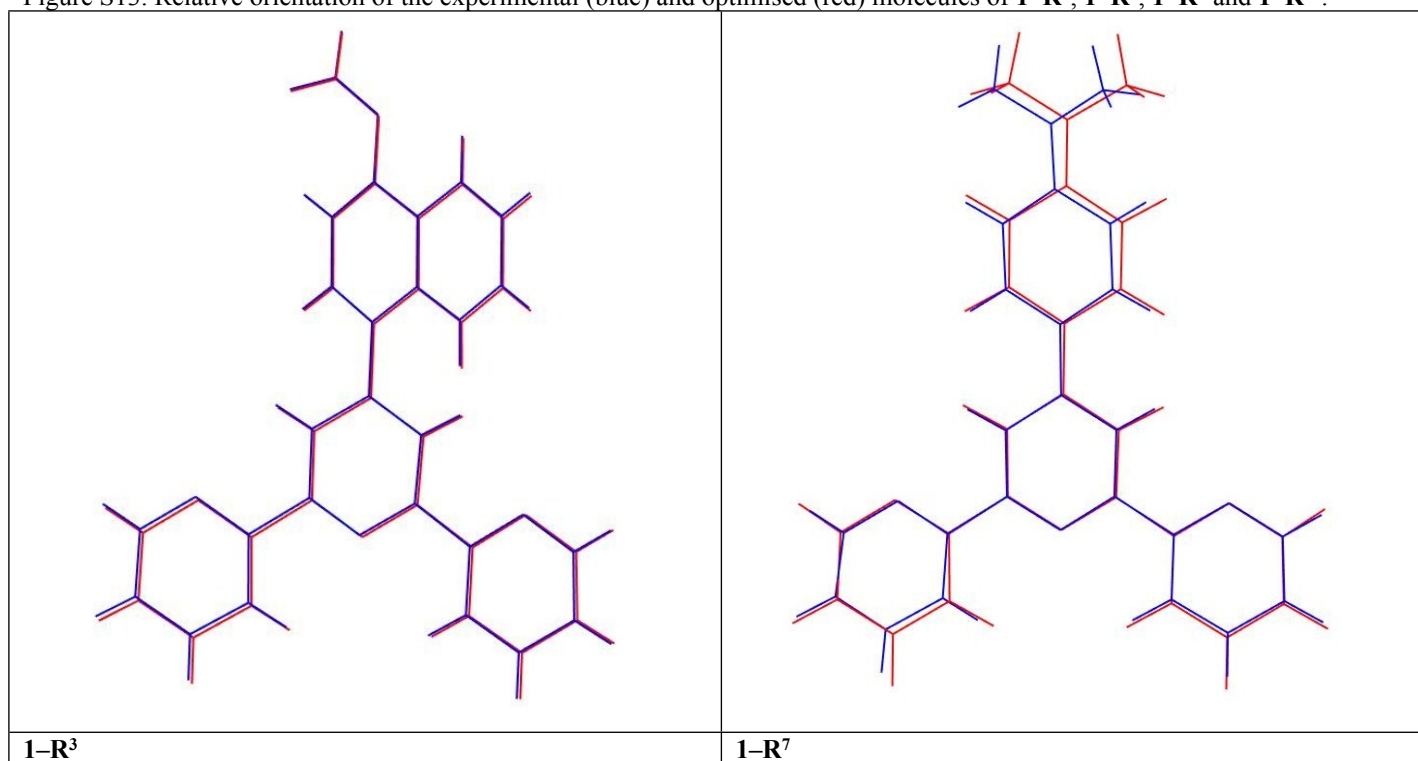

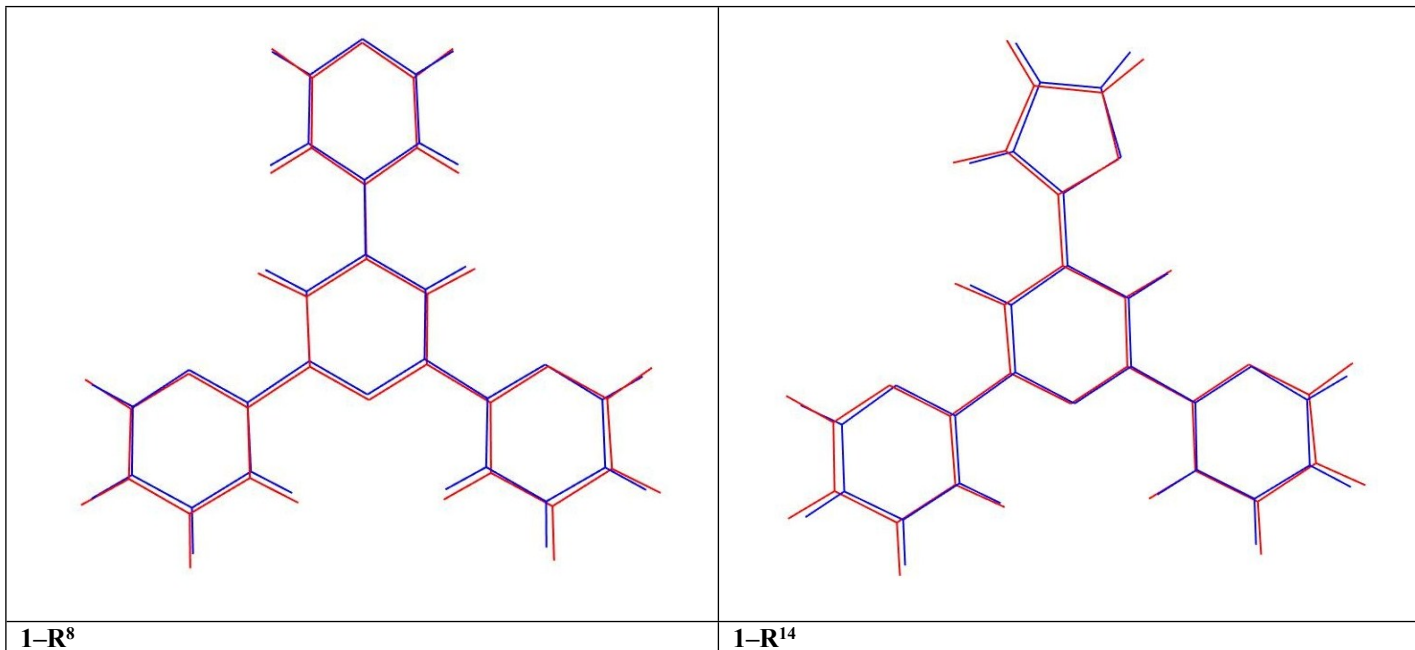

**Figure S14.** Experimental and calculated with CIS(D) and TD-DFT method absorption spectra

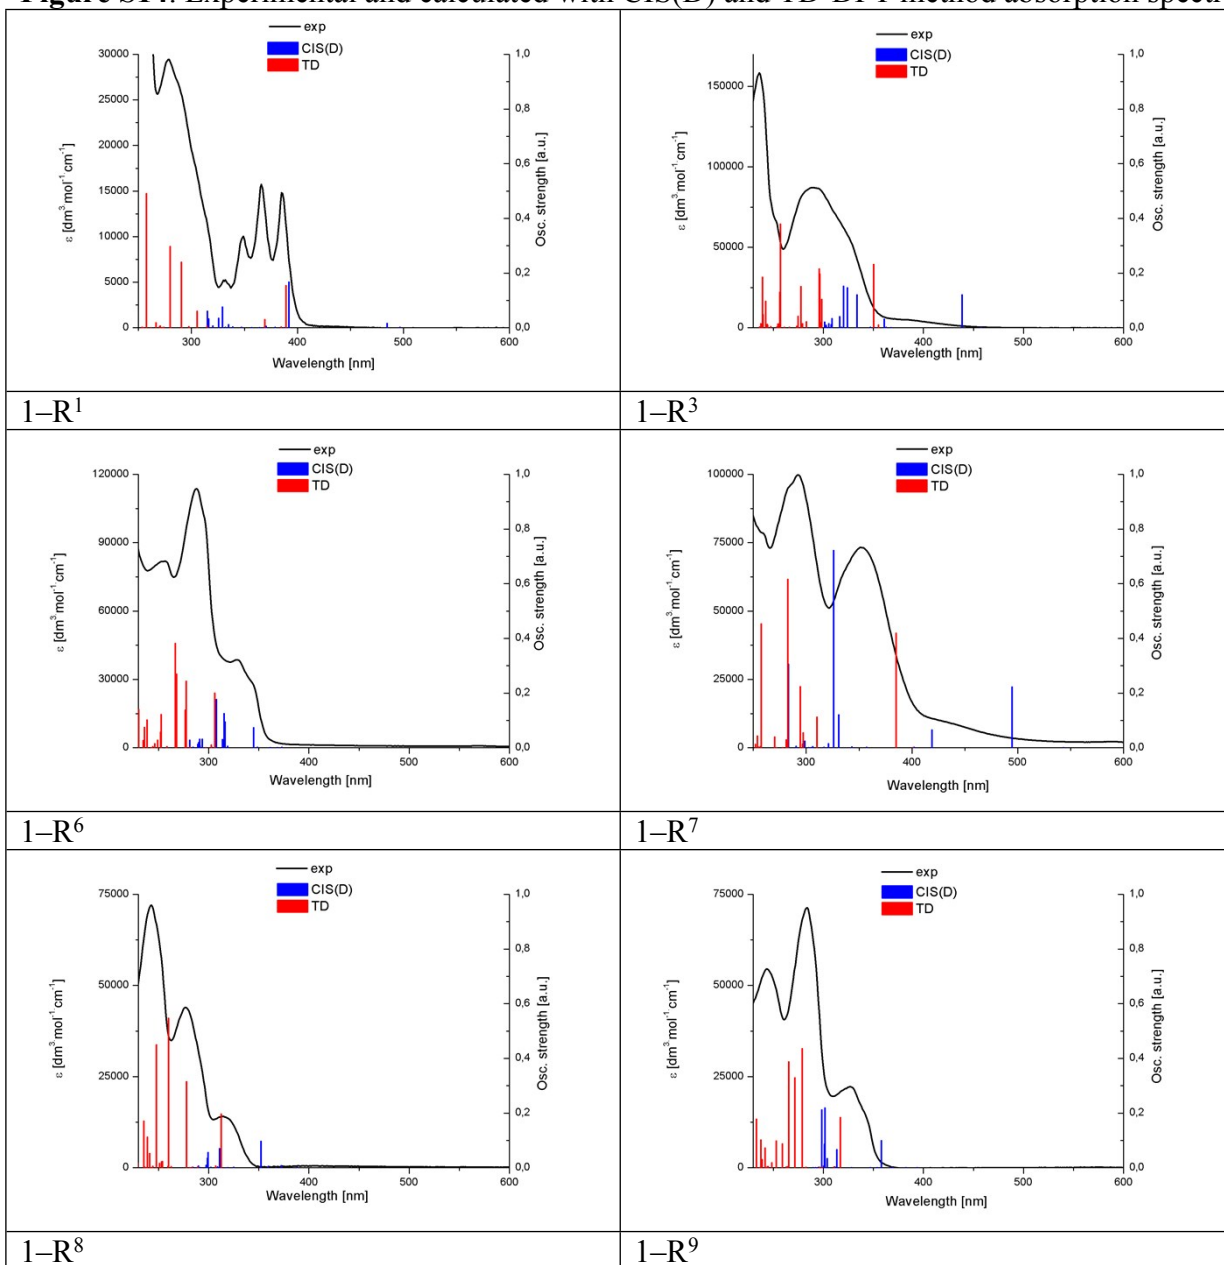

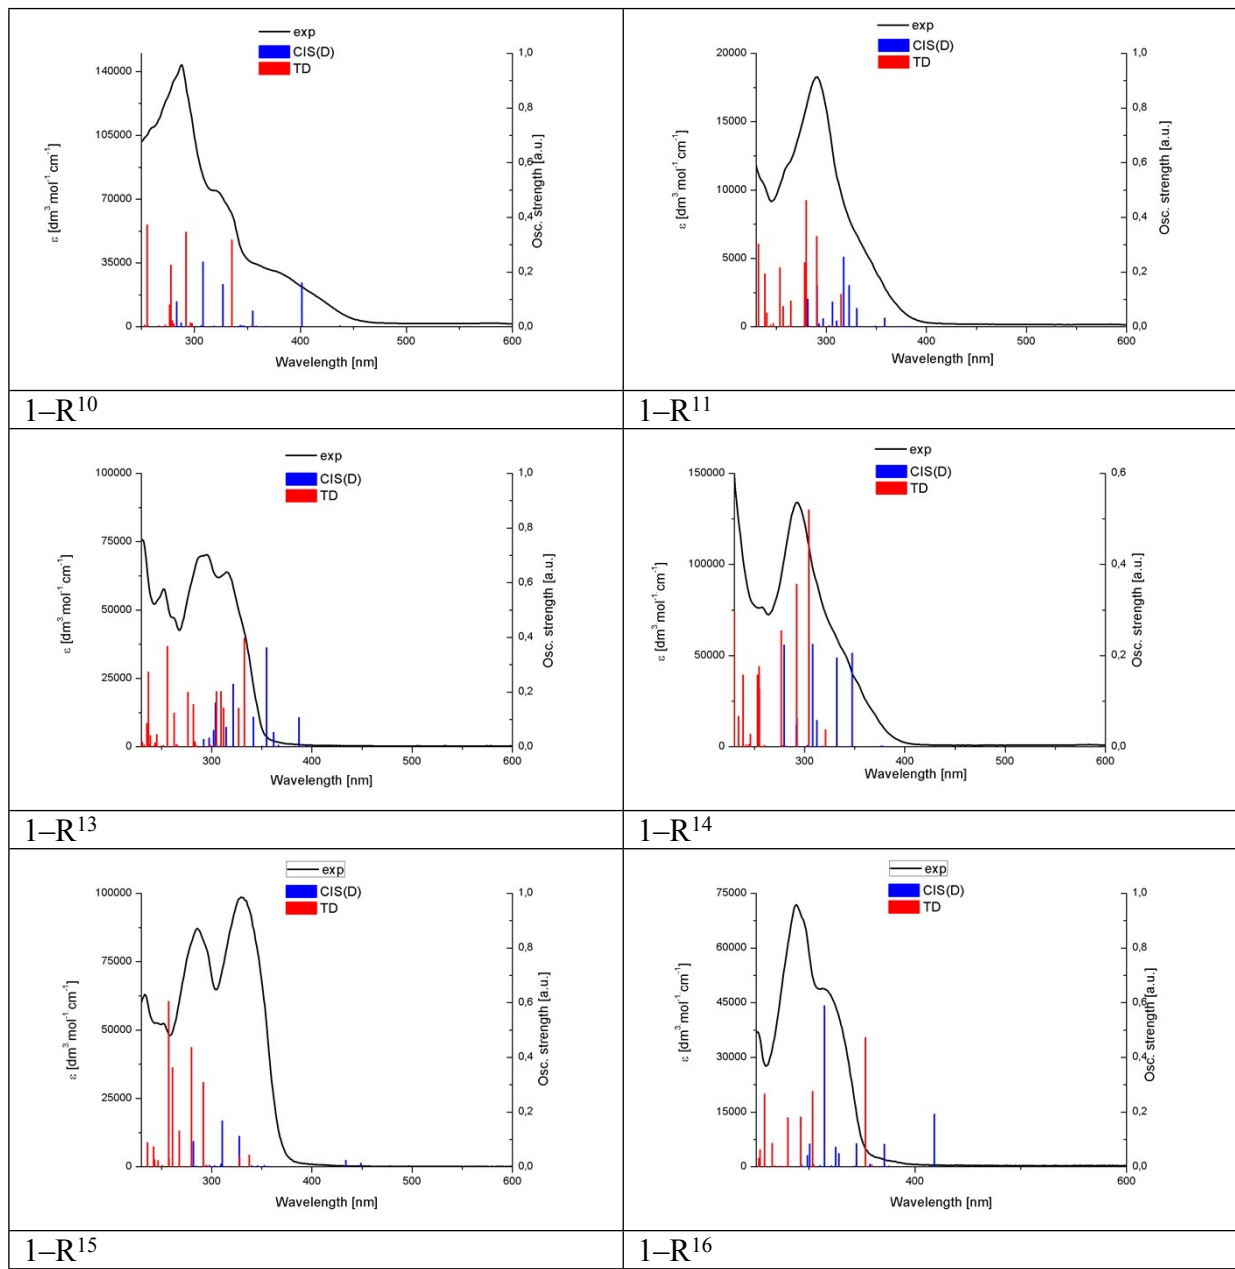

Supplement: c6ob00038j1.pdf [file c6ob00038j1.pdf]
